# Supplementary material for: An unusual Wittig reaction with sugar derivatives: exclusive formation of a 4-deoxy analogue of α-galactosyl ceramide
Source: Royal Society of Chemistry journal article supplement (doi:10.1039/c4ra03369h), 2014-01-01

## Supporting Information

# **An Unusual Wittig Reaction with Sugar Derivatives: Exclusive Formation of a 4-Deoxy Analogue of $\alpha$ -Galactosyl Ceramide**

*Ratnadeep C. Sawant, Yu-Hsuan Lih, Shih-An Yang, Chun-Hong Yeh, Hung-Ju Tai,*

*Chung-Li Huang, Hua-Shuan Lin, Satpal Singh Badsara and Shun-Yuan Luo\**

Department of Chemistry, National Chung Hsing University, Taichung 402, Taiwan

Fax: +886(4)22862547; E-mail: [syluo@dragon.nchu.edu.tw](mailto:syluo@dragon.nchu.edu.tw)

### **Content**

#### **Page**

|                                                          |    |
|----------------------------------------------------------|----|
| List of Content.....                                     | 01 |
| <sup>1</sup> H NMR spectrum of compound <b>5a</b> .....  | 05 |
| <sup>13</sup> C NMR spectrum of compound <b>5a</b> ..... | 06 |
| DEPT NMR spectrum of compound <b>5a</b> .....            | 07 |
| <sup>1</sup> H NMR spectrum of compound <b>5b</b> .....  | 08 |
| <sup>13</sup> C NMR spectrum of compound <b>5b</b> ..... | 09 |
| DEPT NMR spectrum of compound <b>5b</b> .....            | 10 |
| <sup>1</sup> H NMR spectrum of compound <b>5c</b> .....  | 11 |
| <sup>13</sup> C NMR spectrum of compound <b>5c</b> ..... | 12 |
| DEPT NMR spectrum of compound <b>5c</b> .....            | 13 |
| <sup>1</sup> H NMR spectrum of compound <b>6a</b> .....  | 14 |
| <sup>13</sup> C NMR spectrum of compound <b>6a</b> ..... | 15 |
| DEPT NMR spectrum of compound <b>6a</b> .....            | 16 |

|                                                                              |    |
|------------------------------------------------------------------------------|----|
| $^1\text{H}$ - $^1\text{H}$ COSY NMR spectrum of compound <b>6a</b> .....    | 17 |
| $^{13}\text{C}$ - $^1\text{H}$ HSQC NMR spectrum of compound <b>6a</b> ..... | 18 |
| $^1\text{H}$ NMR spectrum of compound <b>6b</b> .....                        | 19 |
| $^{13}\text{C}$ NMR spectrum of compound <b>6b</b> .....                     | 20 |
| DEPT NMR spectrum of compound <b>6b</b> .....                                | 21 |
| $^1\text{H}$ - $^1\text{H}$ COSY NMR spectrum of compound <b>6b</b> .....    | 22 |
| $^{13}\text{C}$ - $^1\text{H}$ HSQC NMR spectrum of compound <b>6b</b> ..... | 23 |
| $^1\text{H}$ NMR spectrum of compound <b>7a</b> .....                        | 24 |
| $^{13}\text{C}$ NMR spectrum of compound <b>7a</b> .....                     | 25 |
| DEPT NMR spectrum of compound <b>7a</b> .....                                | 26 |
| $^1\text{H}$ NMR spectrum of compound <b>7b</b> .....                        | 27 |
| $^{13}\text{C}$ NMR spectrum of compound <b>7b</b> .....                     | 28 |
| DEPT NMR spectrum of compound <b>7b</b> .....                                | 29 |
| $^1\text{H}$ NMR spectrum of compound <b>7c</b> .....                        | 30 |
| $^{13}\text{C}$ NMR spectrum of compound <b>7c</b> .....                     | 31 |
| DEPT NMR spectrum of compound <b>7c</b> .....                                | 32 |
| $^1\text{H}$ NMR spectrum of compound <b>9a</b> .....                        | 33 |
| $^{13}\text{C}$ NMR spectrum of compound <b>9a</b> .....                     | 34 |
| DEPT NMR spectrum of compound <b>9a</b> .....                                | 35 |
| $^1\text{H}$ - $^1\text{H}$ COSY NMR spectrum of compound <b>9a</b> .....    | 36 |
| $^{13}\text{C}$ - $^1\text{H}$ HSQC NMR spectrum of compound <b>9a</b> ..... | 37 |
| $^1\text{H}$ NMR spectrum of compound <b>9b</b> .....                        | 38 |
| $^{13}\text{C}$ NMR spectrum of compound <b>9b</b> .....                     | 39 |
| DEPT NMR spectrum of compound <b>9b</b> .....                                | 40 |

|                                                                              |    |
|------------------------------------------------------------------------------|----|
| $^1\text{H}$ - $^1\text{H}$ COSY NMR spectrum of compound <b>9b</b> .....    | 41 |
| $^{13}\text{C}$ - $^1\text{H}$ HSQC NMR spectrum of compound <b>9b</b> ..... | 42 |
| $^1\text{H}$ NMR spectrum of compound <b>10a-Z</b> .....                     | 43 |
| $^{13}\text{C}$ NMR spectrum of compound <b>10a-Z</b> .....                  | 44 |
| DEPT NMR spectrum of compound <b>10a-Z</b> .....                             | 45 |
| $^1\text{H}$ NMR spectrum of compound <b>10a-E</b> .....                     | 46 |
| $^{13}\text{C}$ NMR spectrum of compound <b>10a-E</b> .....                  | 47 |
| DEPT NMR spectrum of compound <b>10a-E</b> .....                             | 48 |
| $^1\text{H}$ NMR spectrum of compound <b>10b</b> .....                       | 49 |
| $^{13}\text{C}$ NMR spectrum of compound <b>10b</b> .....                    | 50 |
| DEPT NMR spectrum of compound <b>10b</b> .....                               | 51 |
| $^1\text{H}$ NMR spectrum of compound <b>10c</b> .....                       | 52 |
| $^{13}\text{C}$ NMR spectrum of compound <b>10c</b> .....                    | 53 |
| DEPT NMR spectrum of compound <b>10c</b> .....                               | 54 |
| $^1\text{H}$ NMR spectrum of compound <b>10d-Z</b> .....                     | 55 |
| $^{13}\text{C}$ NMR spectrum of compound <b>10d-Z</b> .....                  | 56 |
| DEPT NMR spectrum of compound <b>10d-Z</b> .....                             | 57 |
| $^1\text{H}$ NMR spectrum of compound <b>10d-E</b> .....                     | 58 |
| $^{13}\text{C}$ NMR spectrum of compound <b>10d-E</b> .....                  | 59 |
| DEPT NMR spectrum of compound <b>10d-E</b> .....                             | 60 |
| $^1\text{H}$ NMR spectrum of compound <b>13</b> .....                        | 61 |
| $^{13}\text{C}$ NMR spectrum of compound <b>13</b> .....                     | 62 |
| DEPT NMR spectrum of compound <b>13</b> .....                                | 63 |
| $^1\text{H}$ - $^1\text{H}$ COSY NMR spectrum of compound <b>13</b> .....    | 64 |

|                                                                              |    |
|------------------------------------------------------------------------------|----|
| $^{13}\text{C}$ - $^1\text{H}$ HSQC NMR spectrum of compound <b>13</b> ..... | 65 |
| $^1\text{H}$ NMR spectrum of compound <b>2</b> .....                         | 66 |
| $^{13}\text{C}$ NMR spectrum of compound <b>2</b> .....                      | 67 |
| DEPT NMR spectrum of compound <b>2</b> .....                                 | 68 |

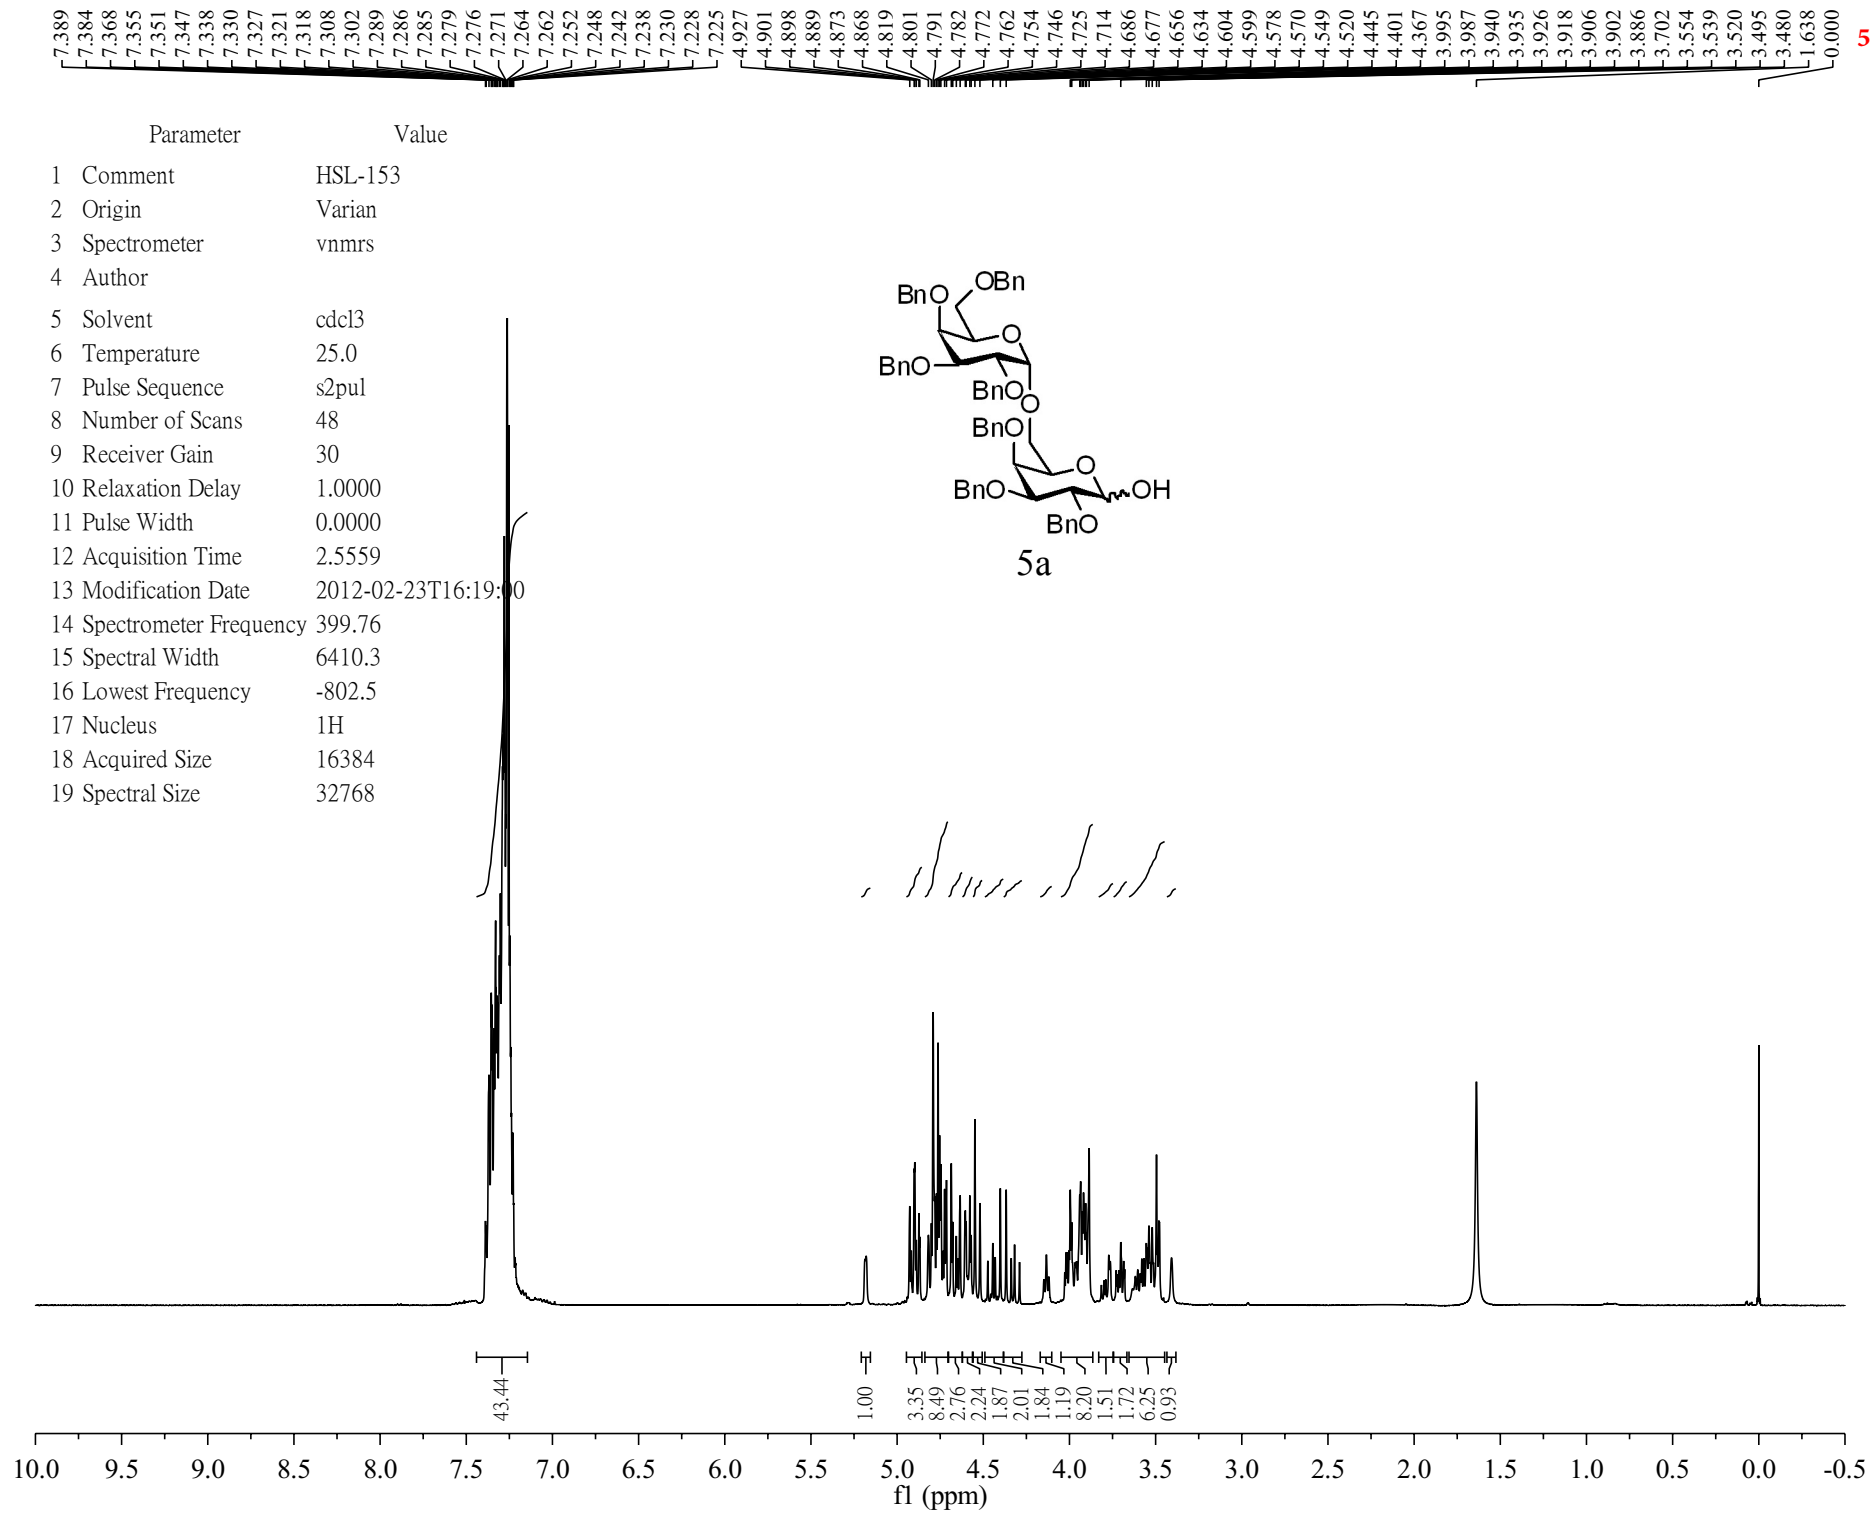

| Parameter              | Value               |
|------------------------|---------------------|
| Title                  | HSL-153-C13         |
| Origin                 | Varian              |
| Spectrometer           | inova               |
| Solvent                | CDC13               |
| Temperature            | 22.0                |
| Pulse Sequence         | s2pul               |
| Experiment             | 1D                  |
| Number of Scans        | 256                 |
| Receiver Gain          | 58                  |
| Relaxation Delay       | 0.5000              |
| Pulse Width            | 0.0000              |
| Acquisition Date       | 2011-11-29T12:29:47 |
| Spectrometer Frequency | 150.87              |
| Spectral Width         | 40000.0             |
| Lowest Frequency       | -4056.5             |
| Nucleus                | <sup>13</sup> C     |
| Acquired Size          | 39987               |
| Spectral Size          | 131072              |

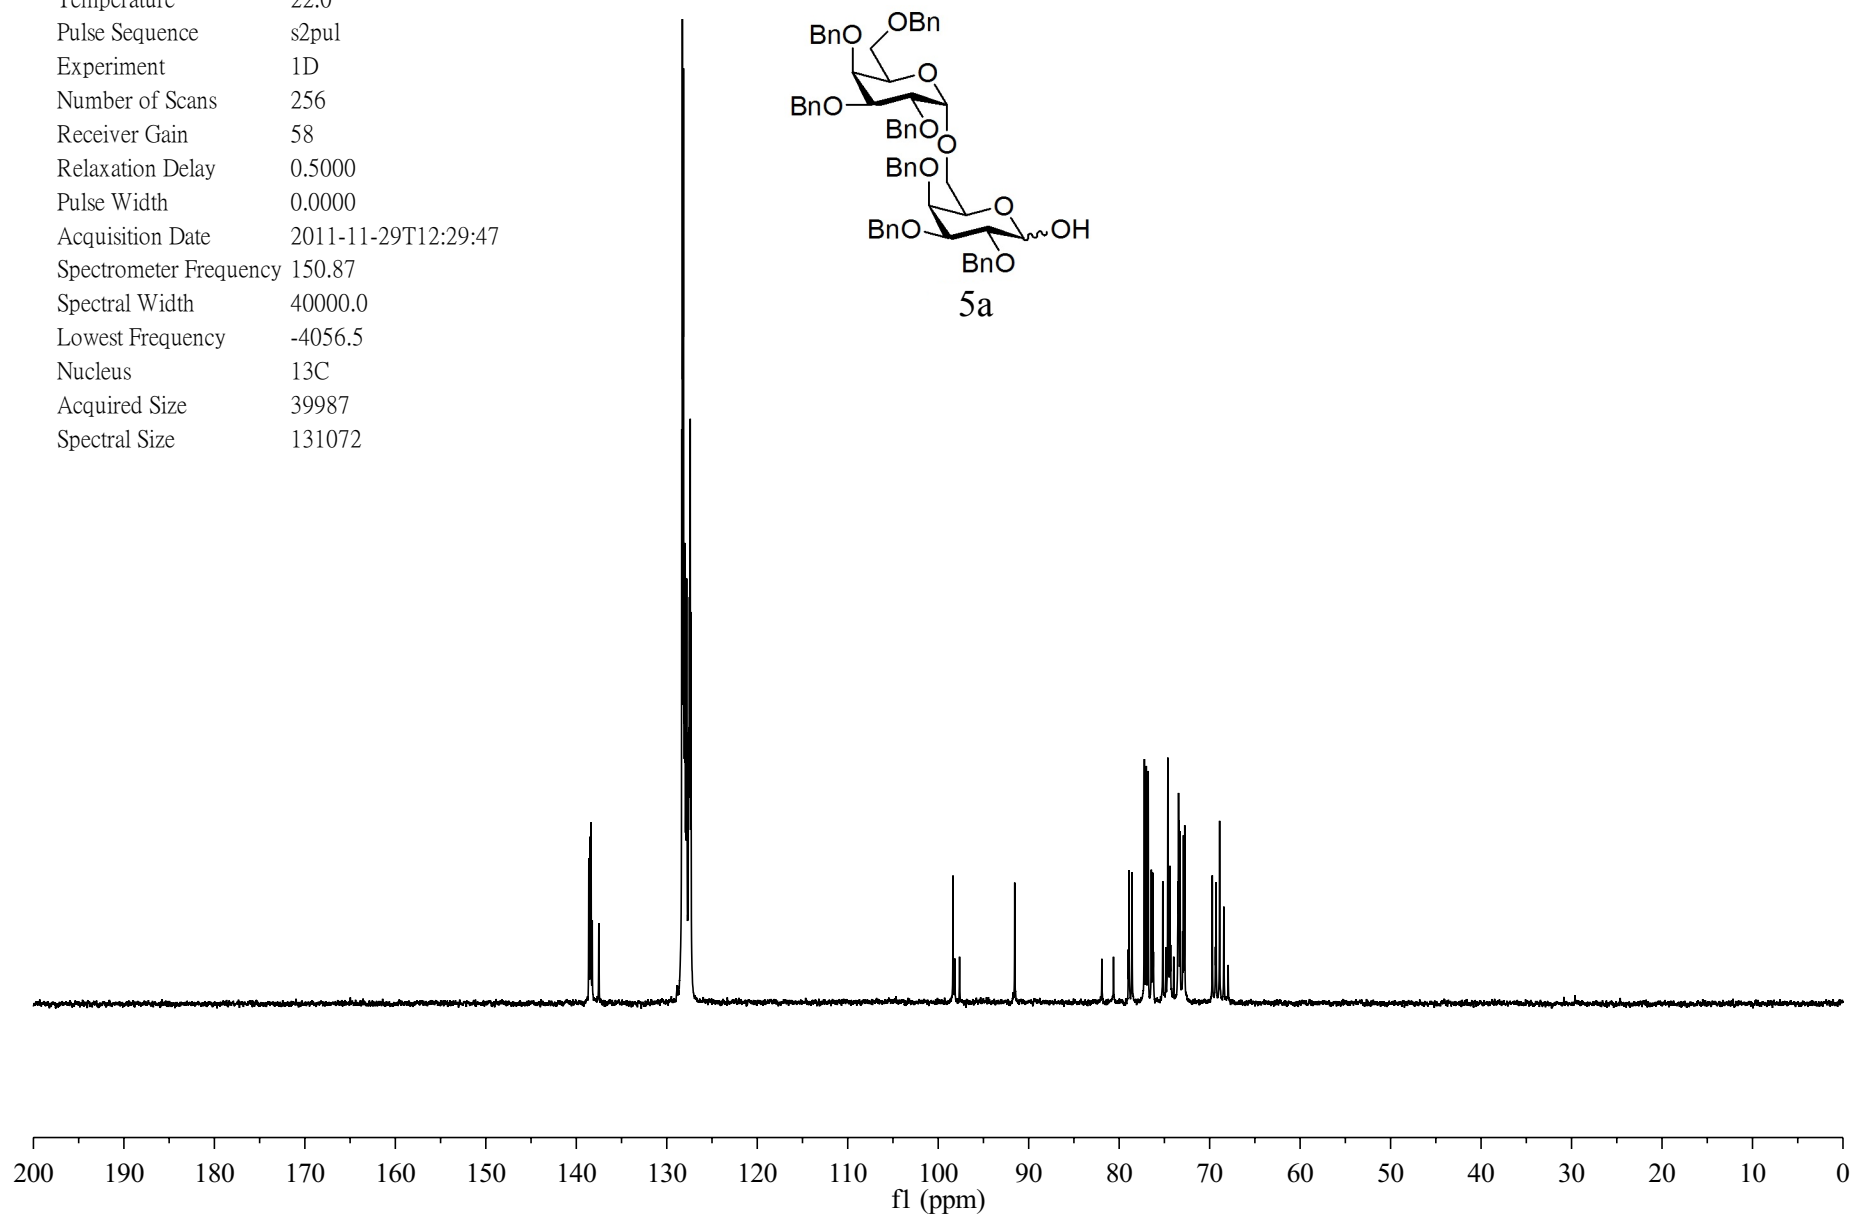

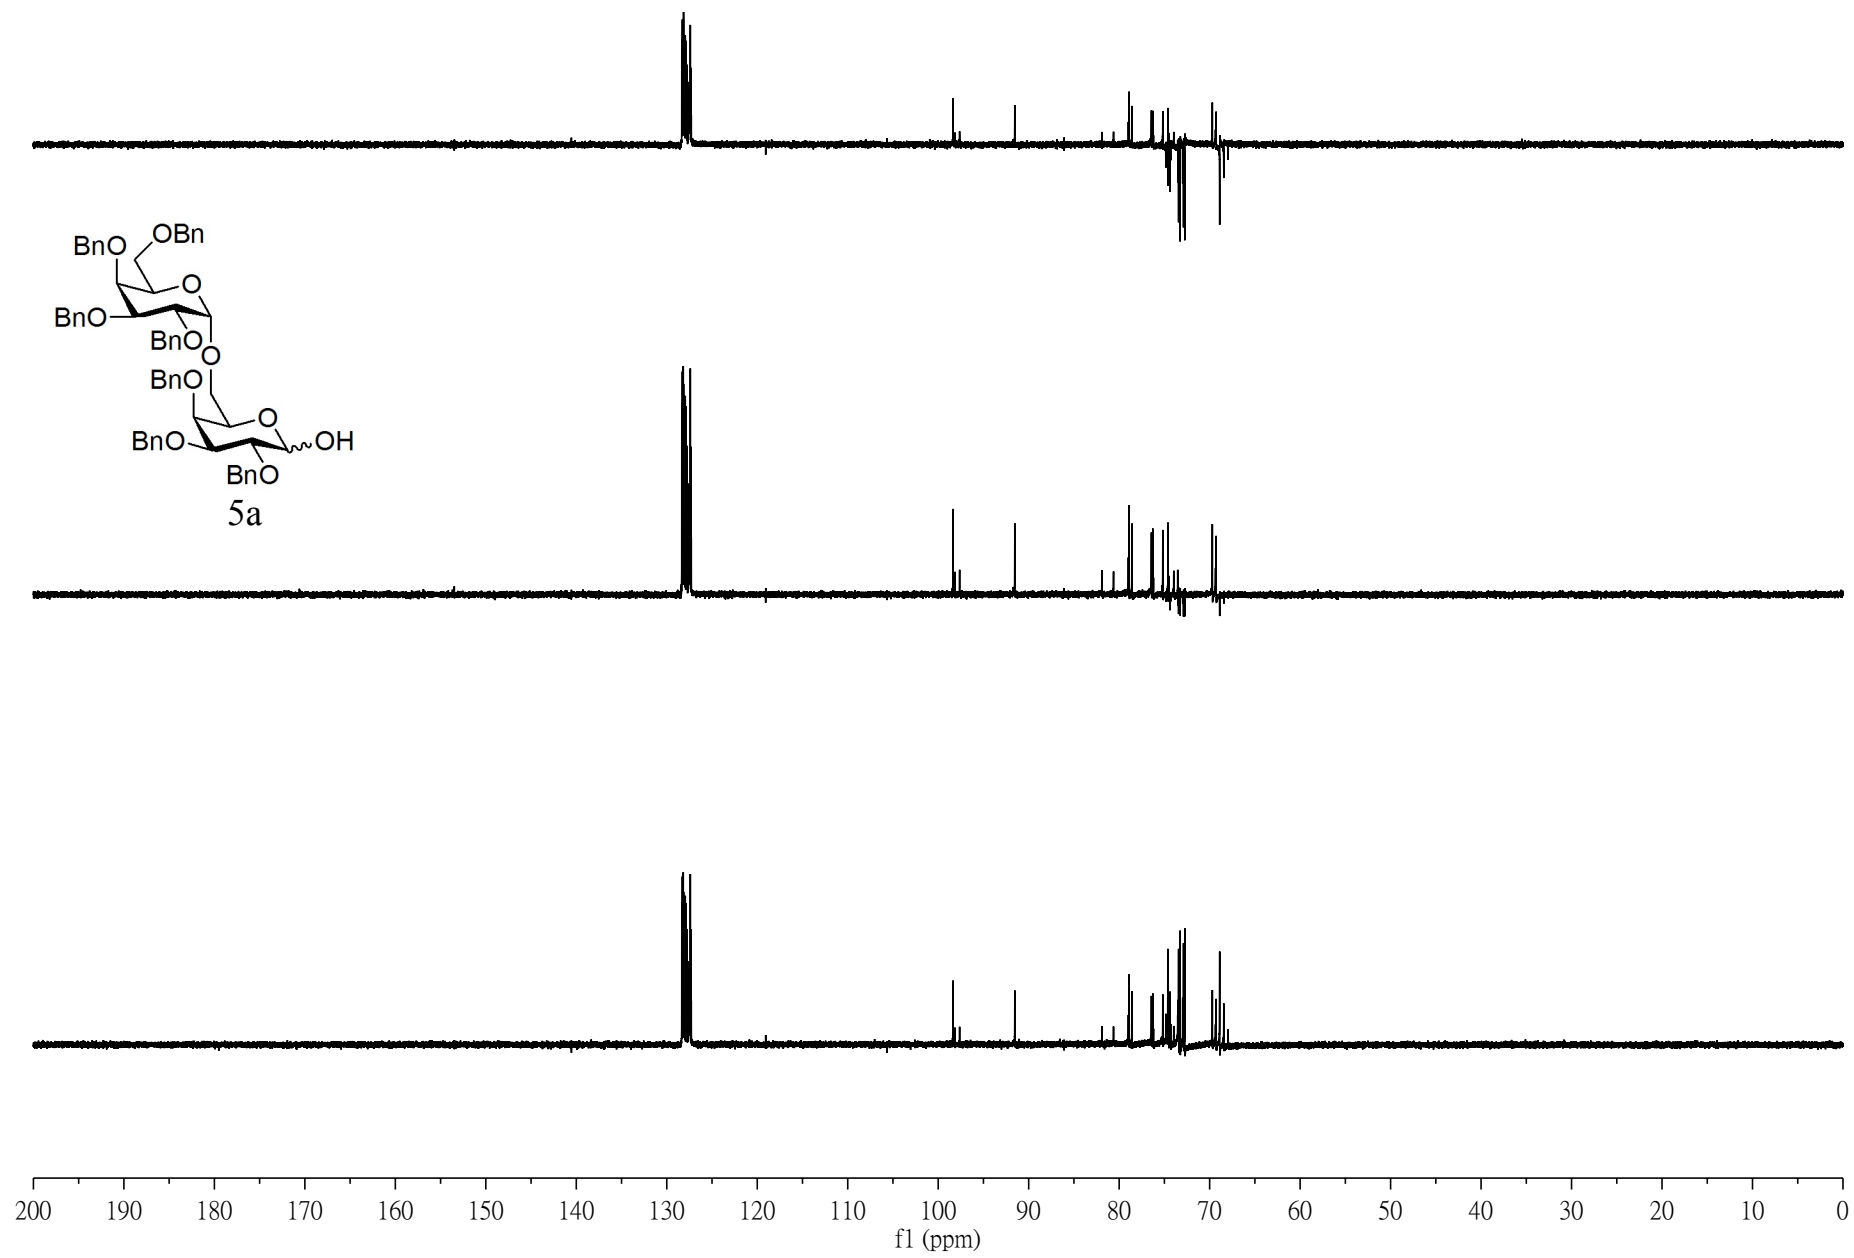

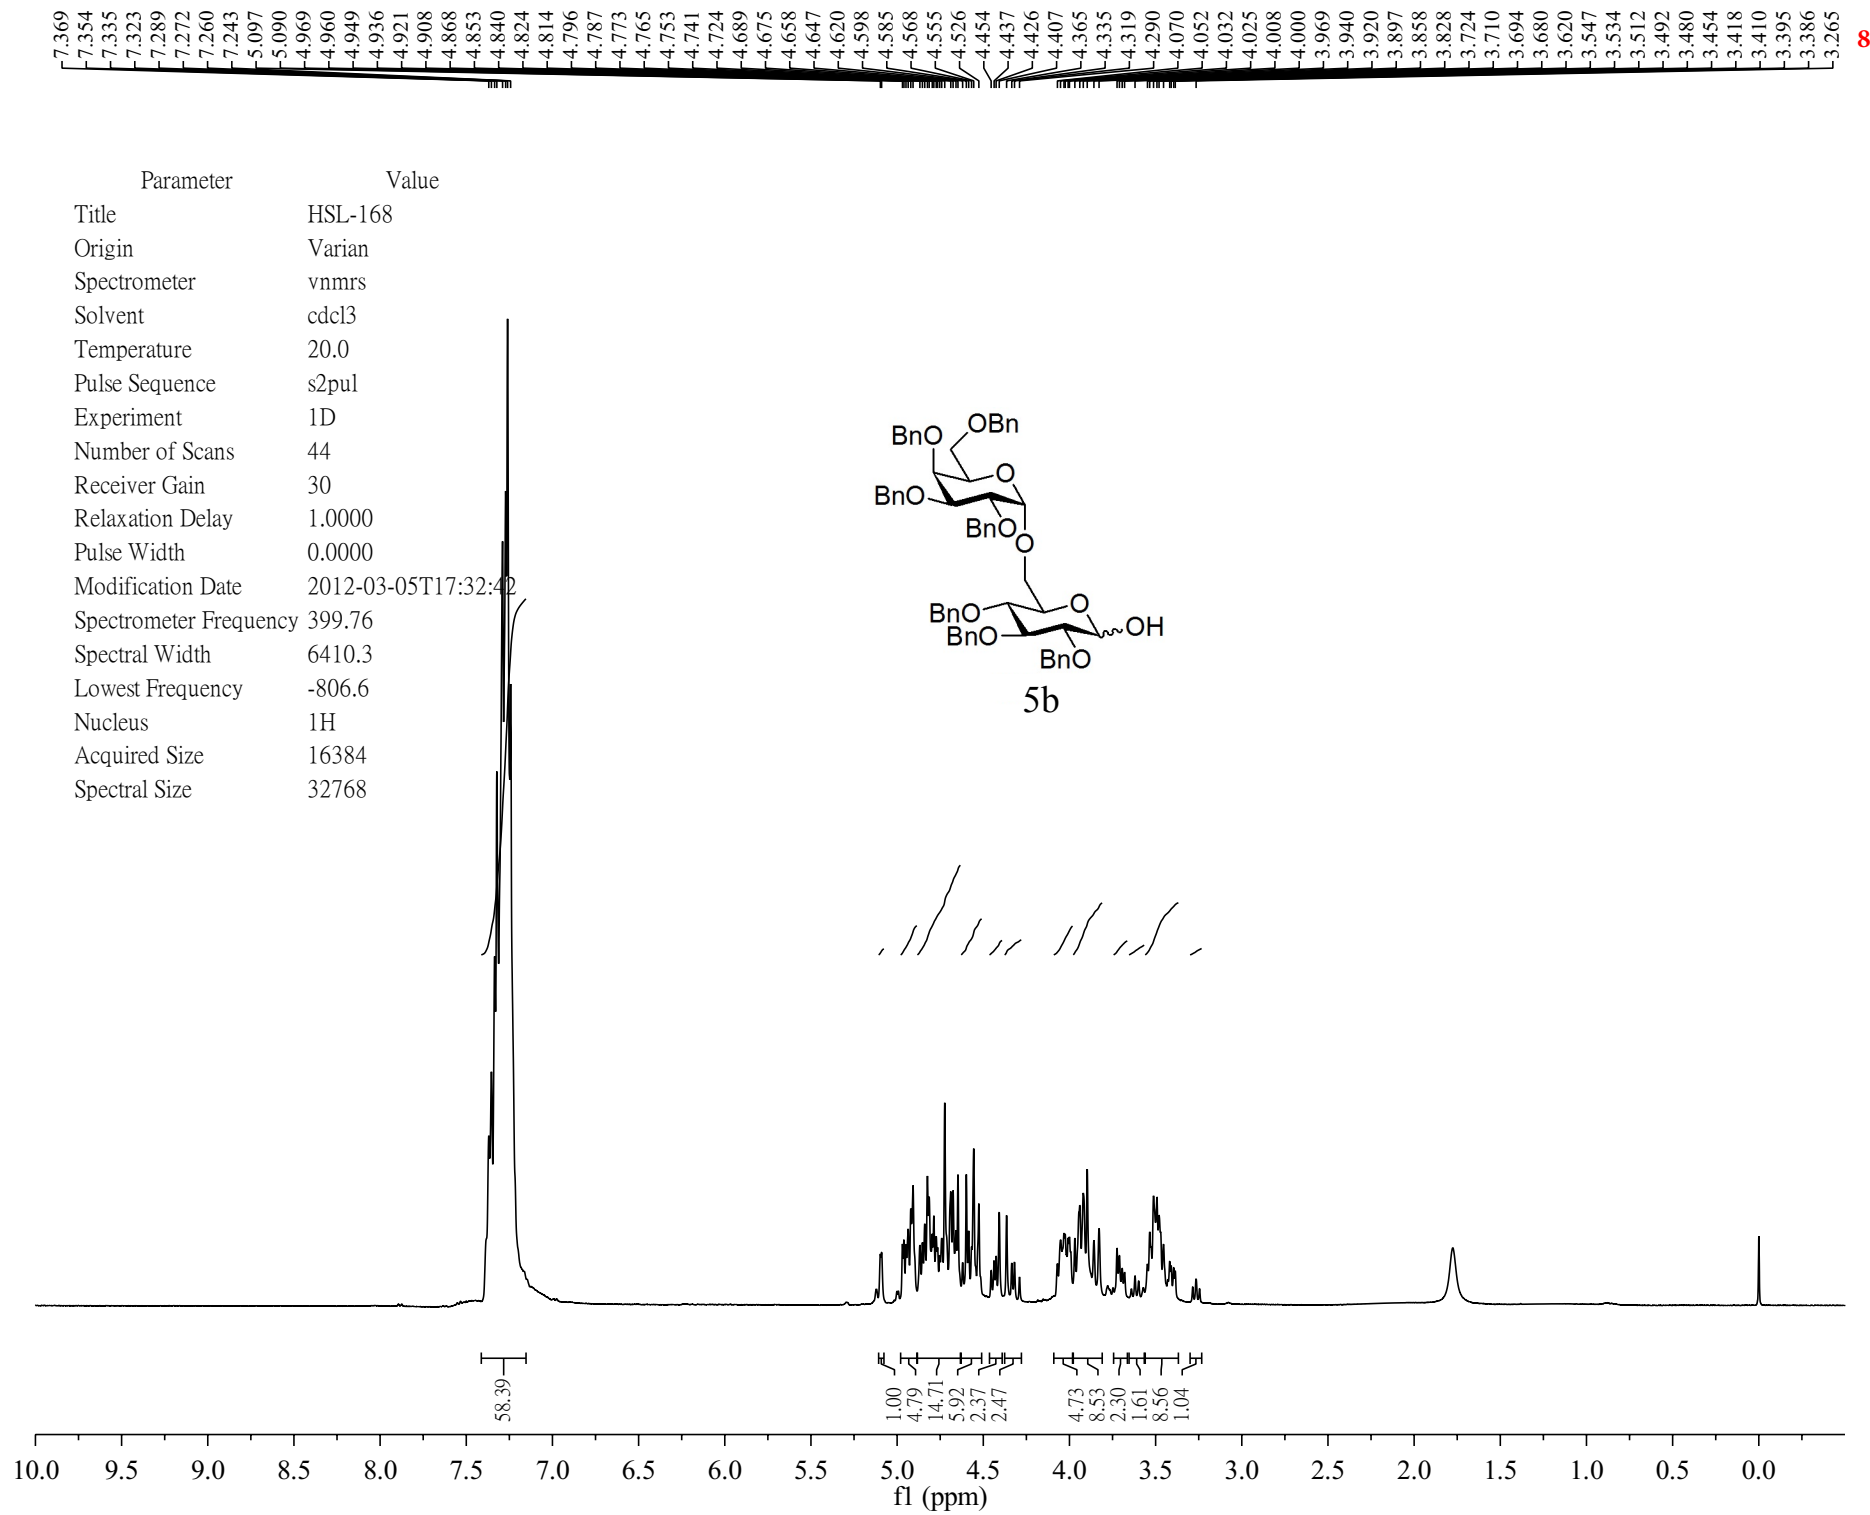



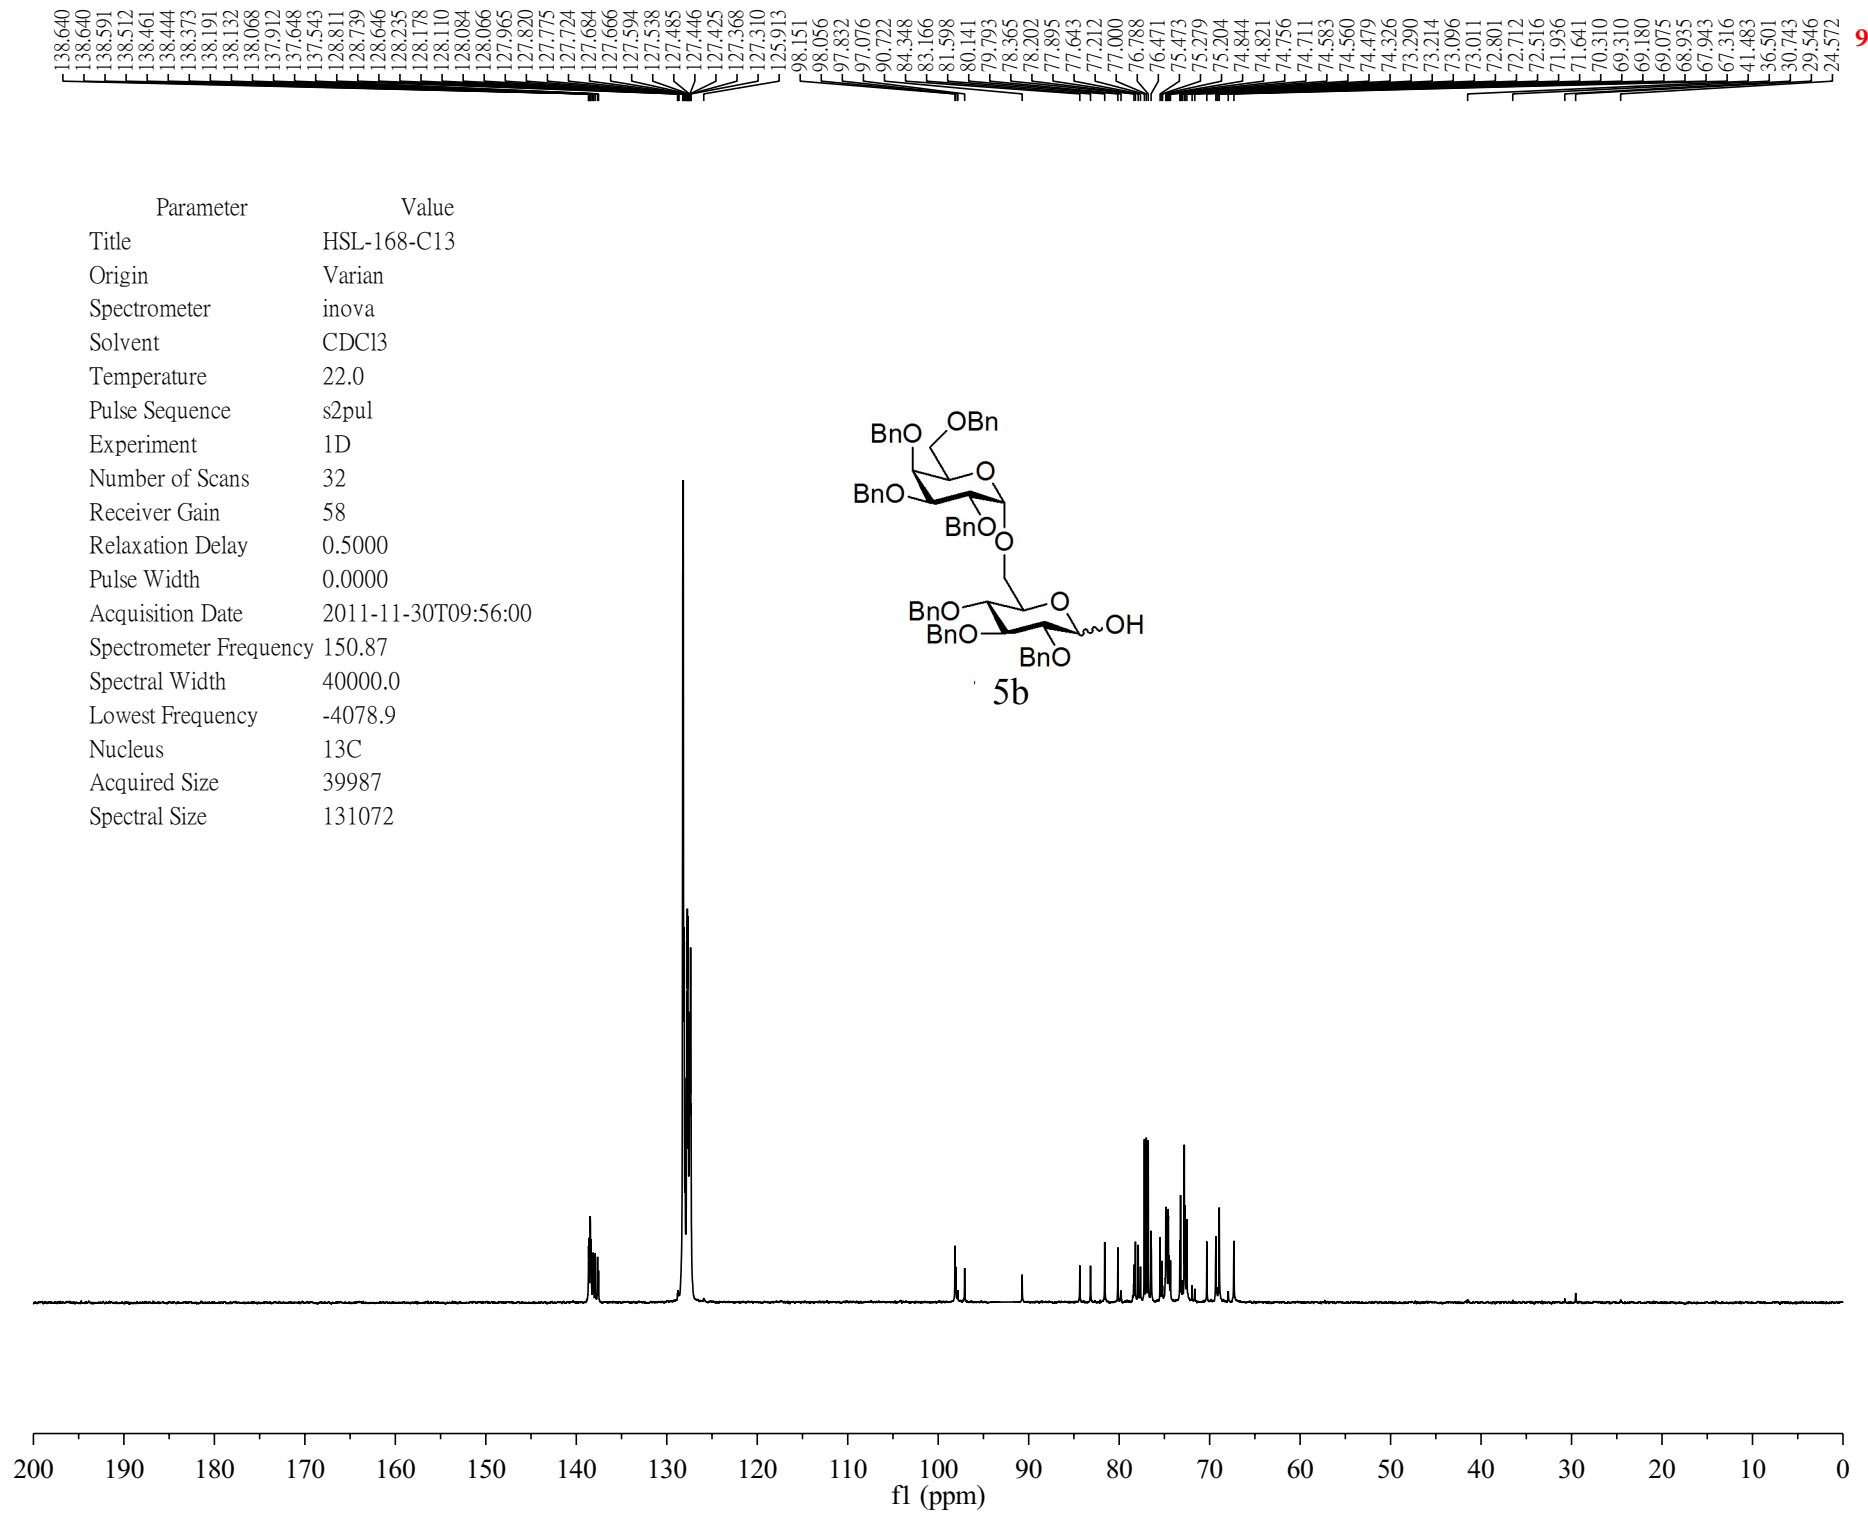

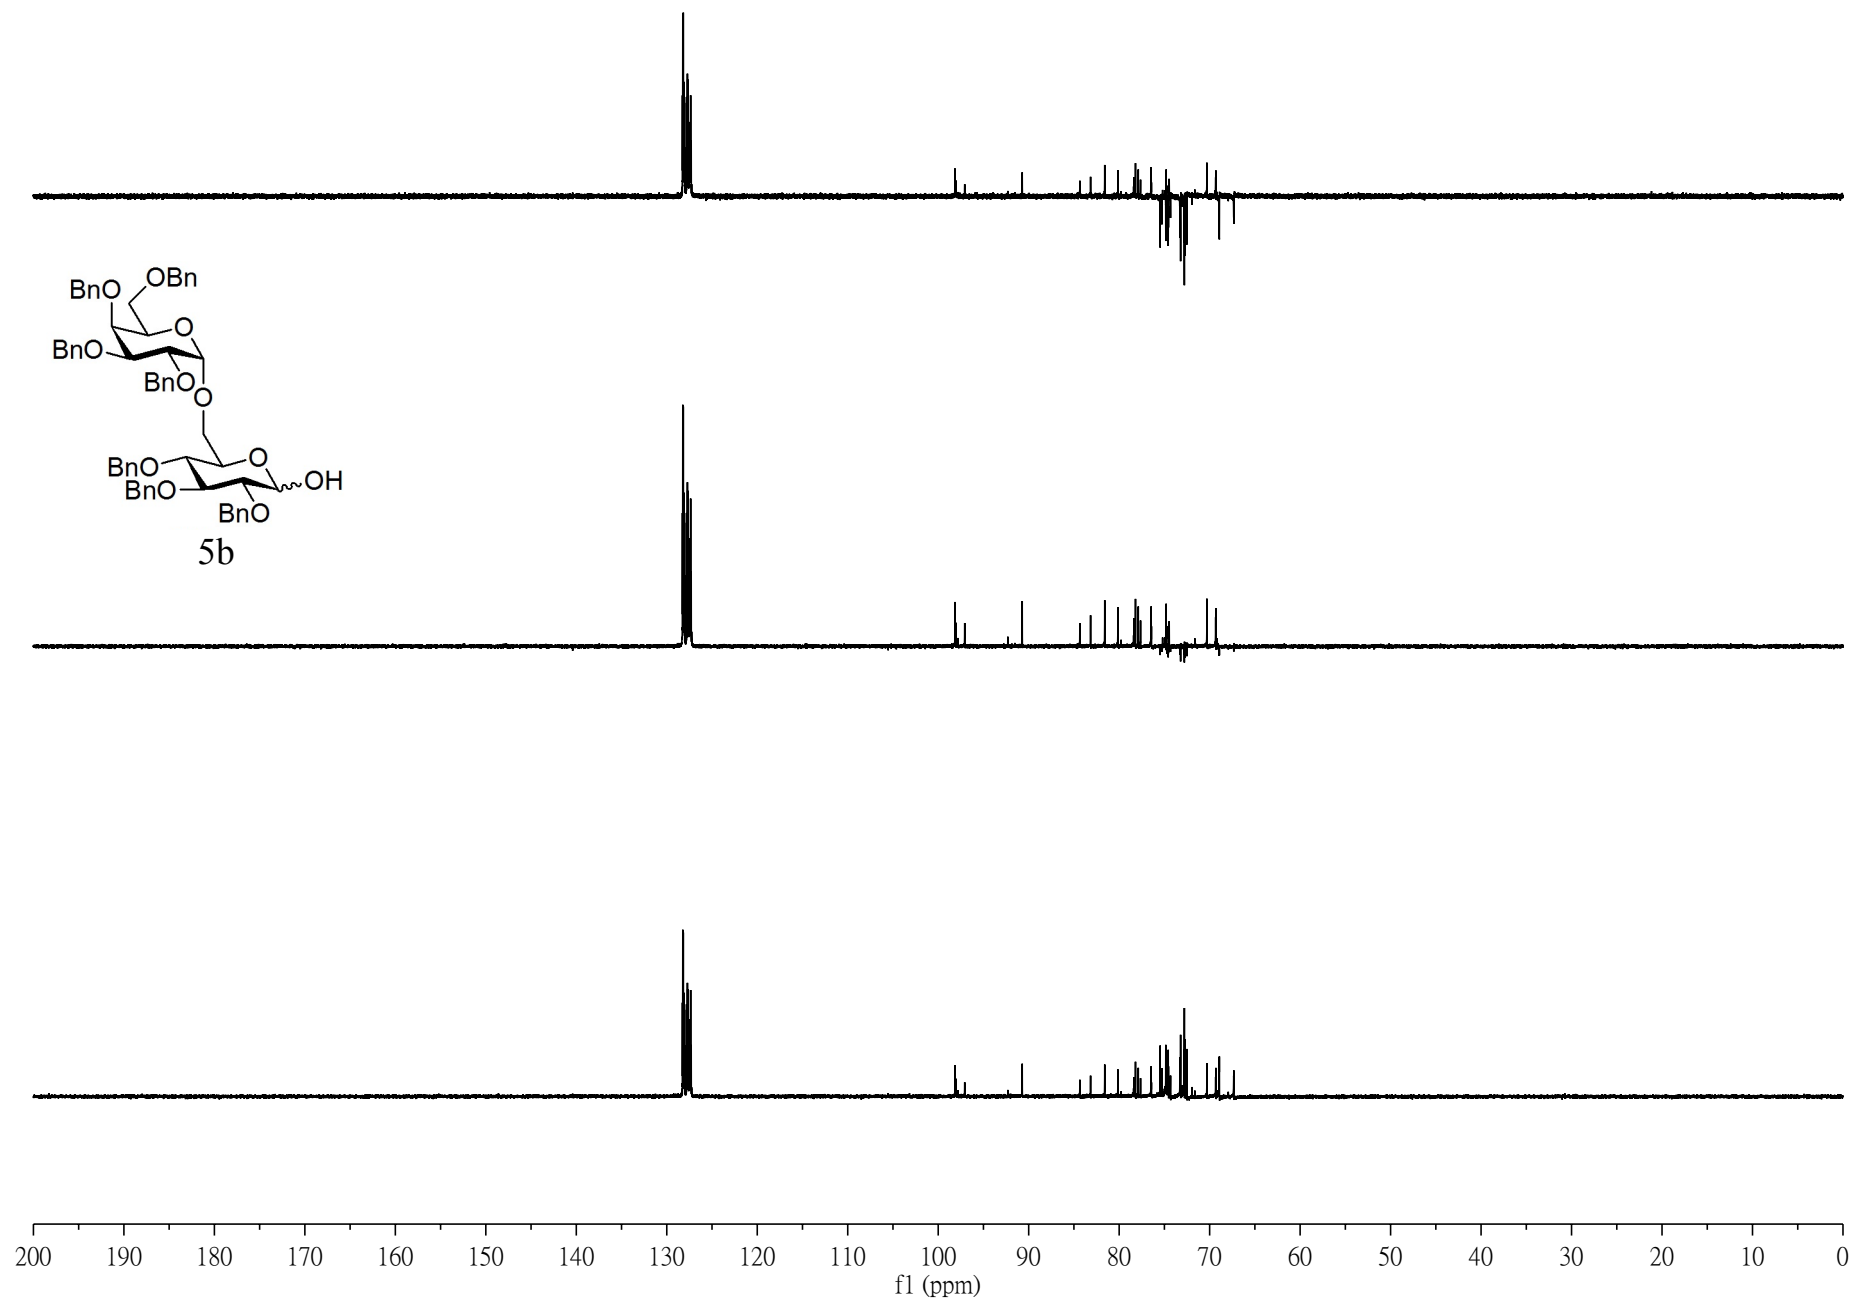

| Parameter              | Value               |
|------------------------|---------------------|
| Title                  | HSL-221             |
| Origin                 | Varian              |
| Spectrometer           | nmrs                |
| Solvent                | cdcl3               |
| Temperature            | 20.0                |
| Pulse Sequence         | s2pul               |
| Experiment             | 1D                  |
| Number of Scans        | 48                  |
| Receiver Gain          | 30                  |
| Relaxation Delay       | 1.0000              |
| Pulse Width            | 0.0000              |
| Acquisition Date       | 2012-01-17T16:19:46 |
| Spectrometer Frequency | 399.76              |
| Spectral Width         | 6410.3              |
| Lowest Frequency       | -808.3              |
| Nucleus                | 1H                  |
| Acquired Size          | 16384               |
| Spectral Size          | 32768               |

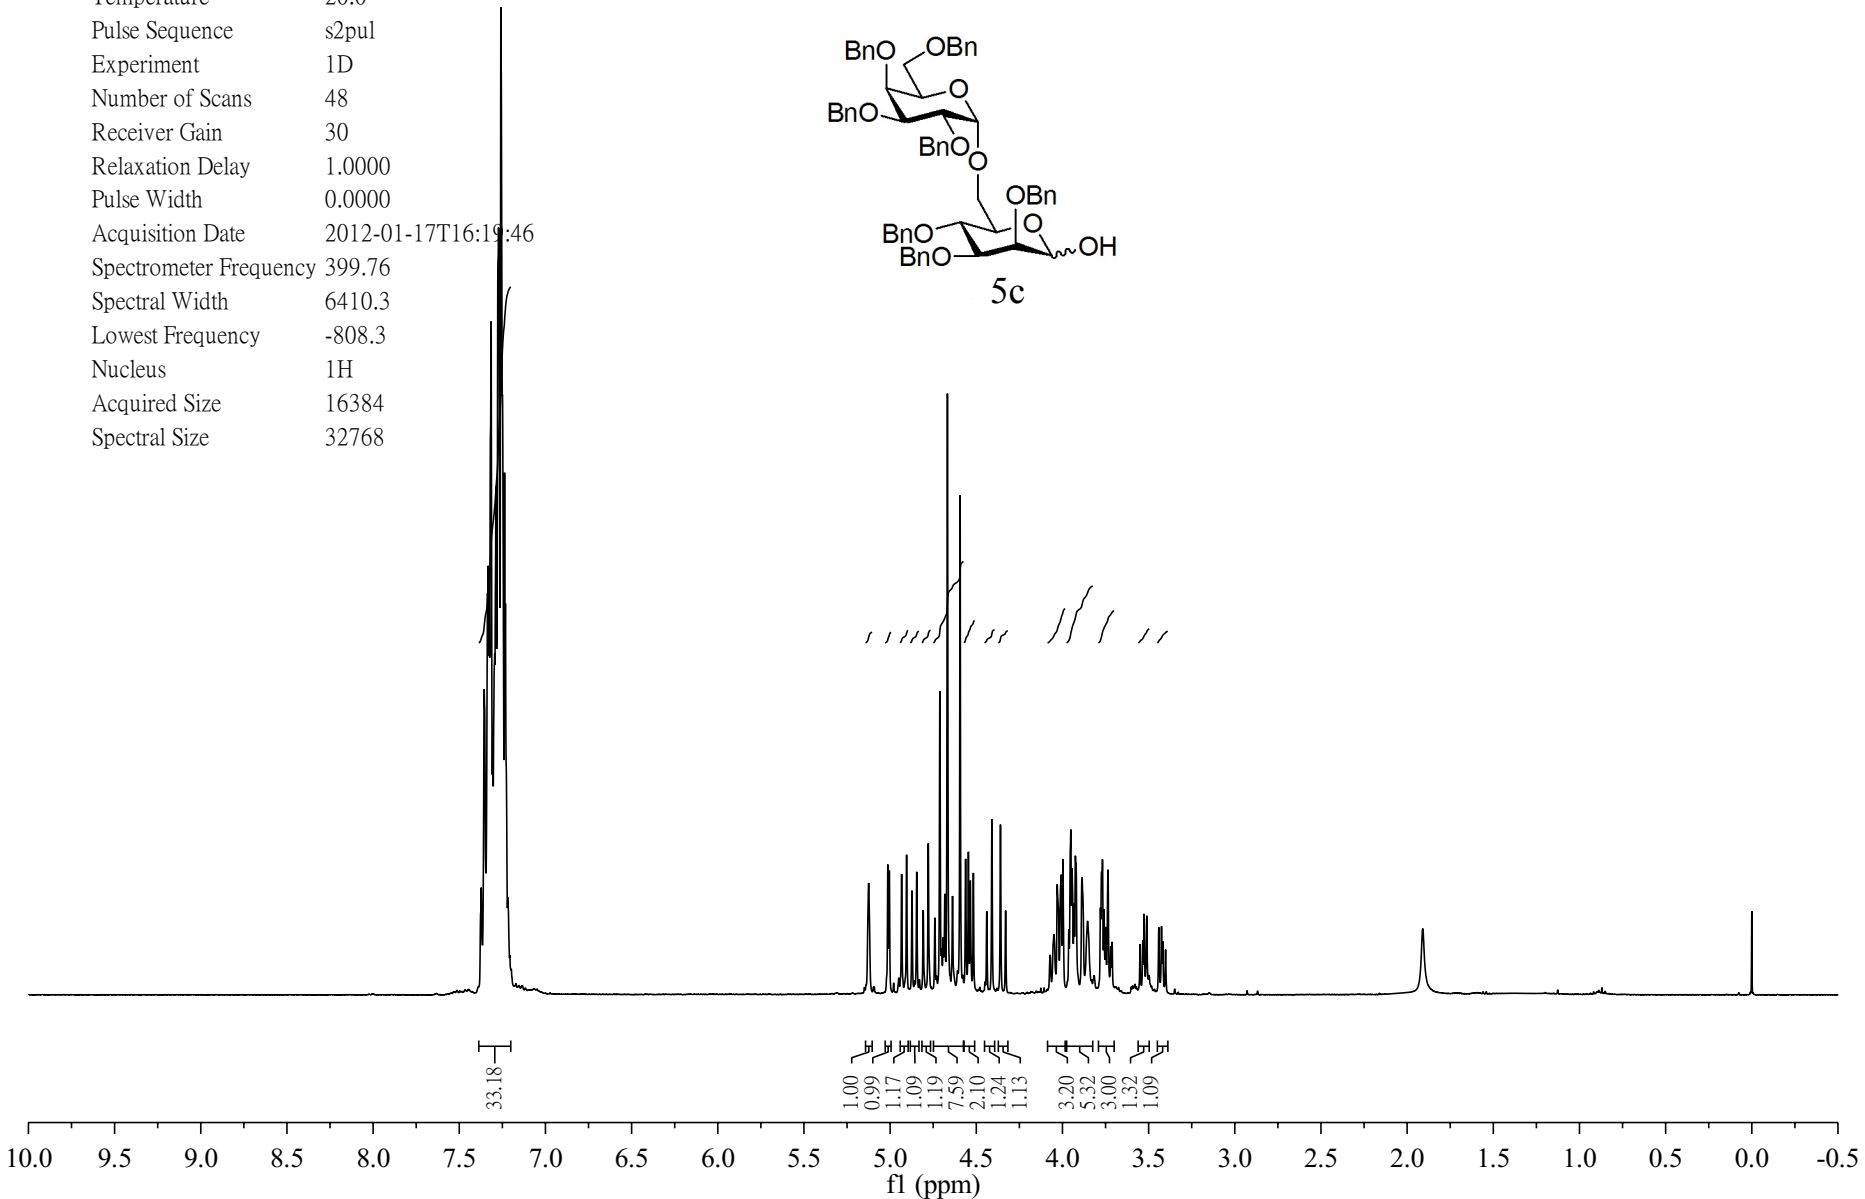

7.372, 7.355, 7.336, 7.332, 7.327, 7.315, 7.305, 7.294, 7.287, 7.272, 7.259, 7.237, 7.232, 7.218, 7.207, 7.198, 5.125, 5.013, 5.004, 4.933, 4.904, 4.873, 4.846, 4.779, 4.711, 4.682, 4.667, 4.638, 4.594, 4.562, 4.546, 4.535, 4.517, 4.409, 4.360, 4.030, 4.007, 3.997, 3.952, 3.944, 3.925, 3.886, 3.773, 3.768, 3.736

0.000

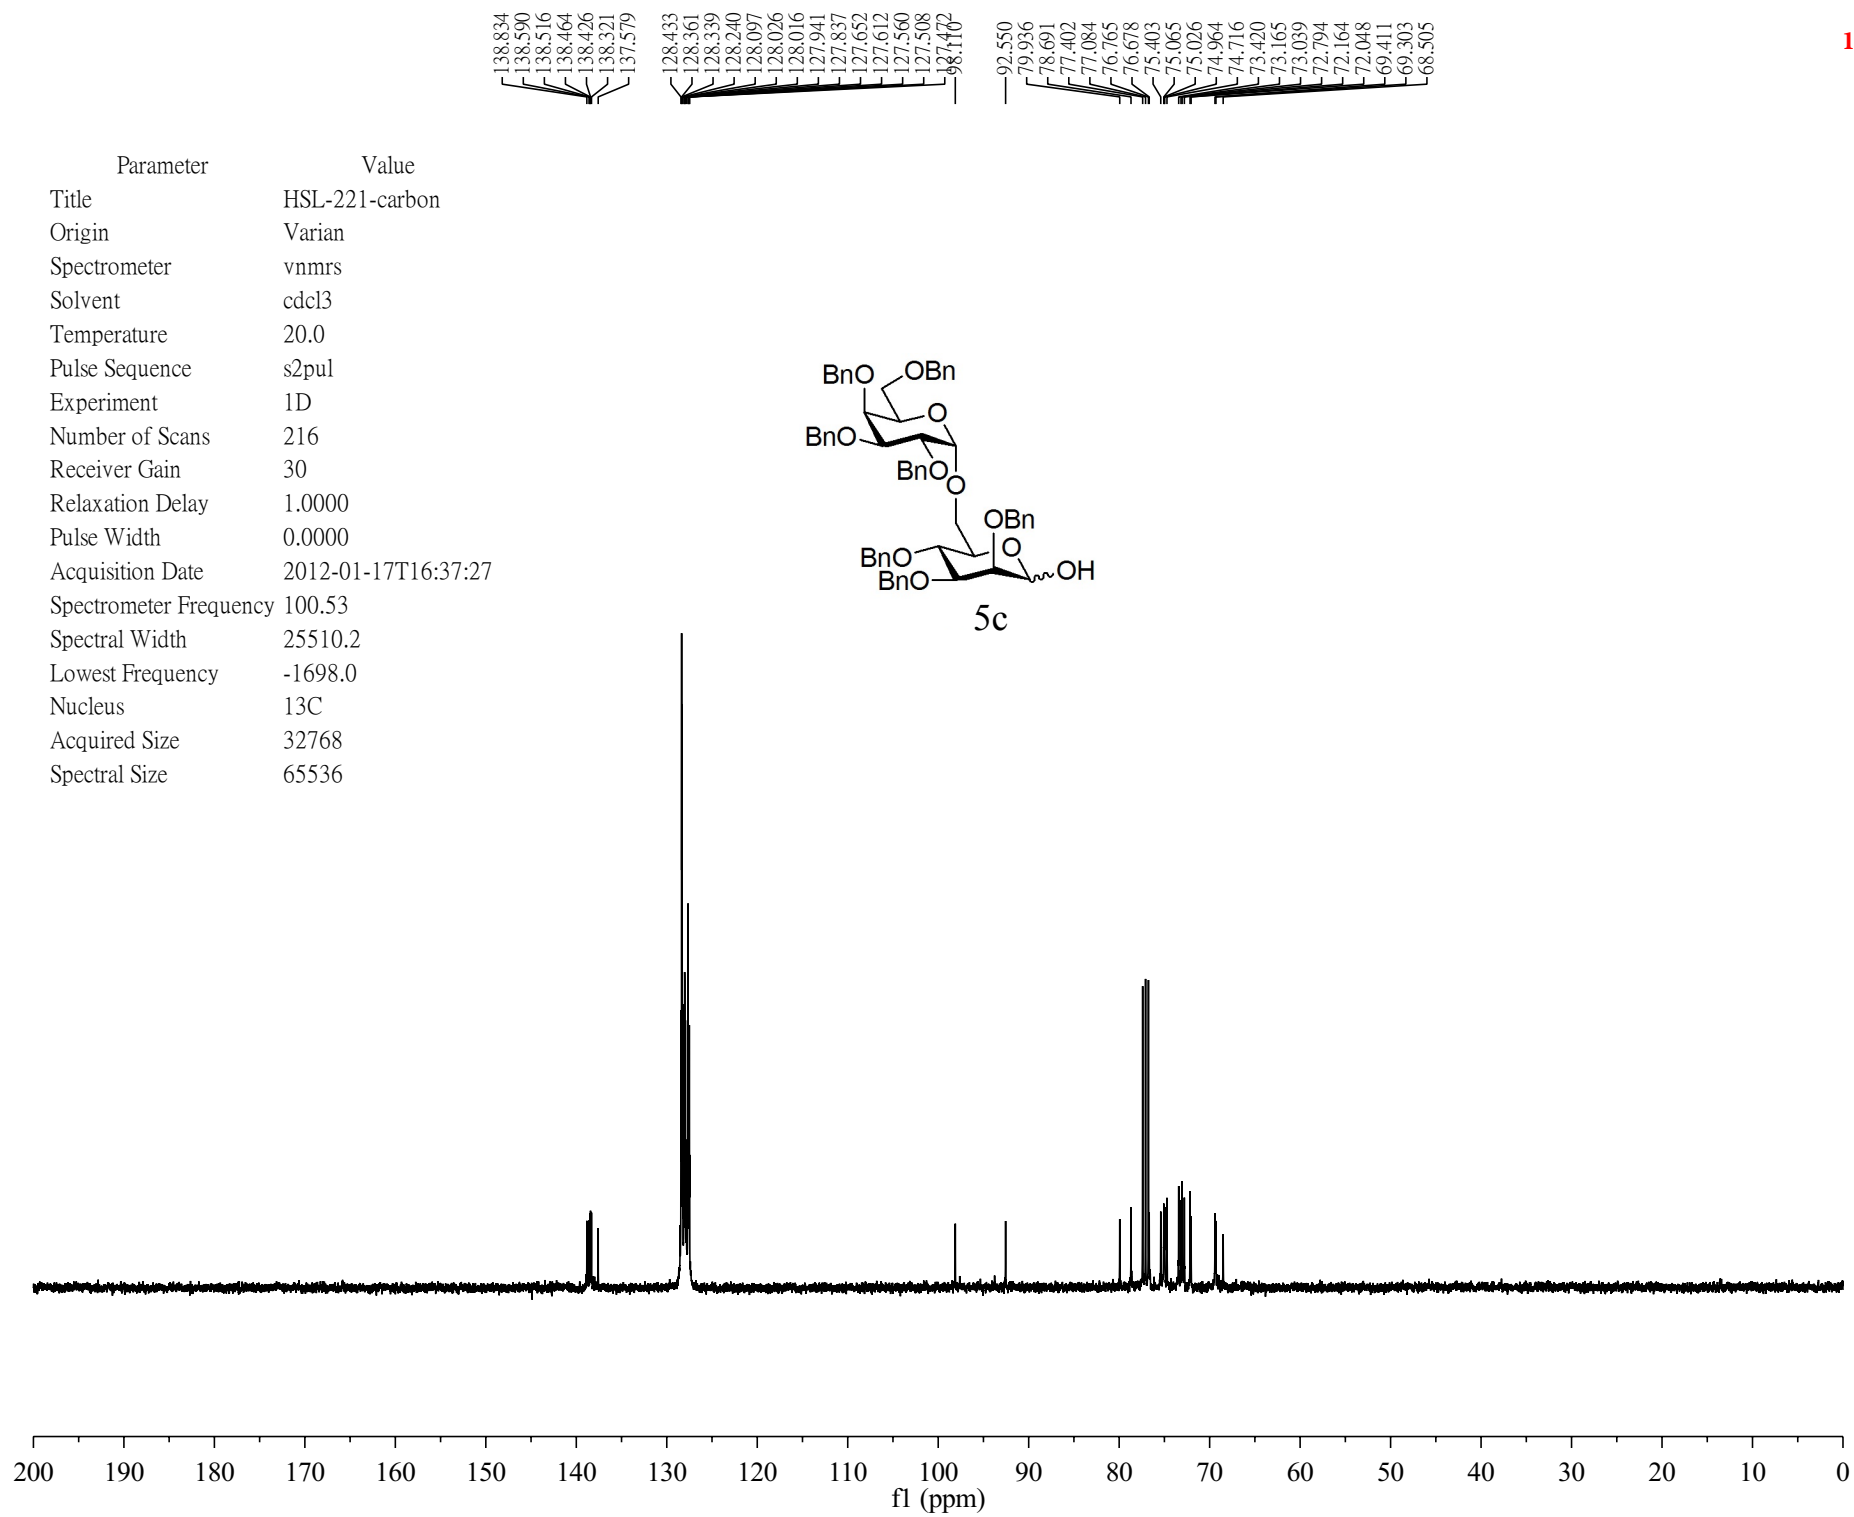

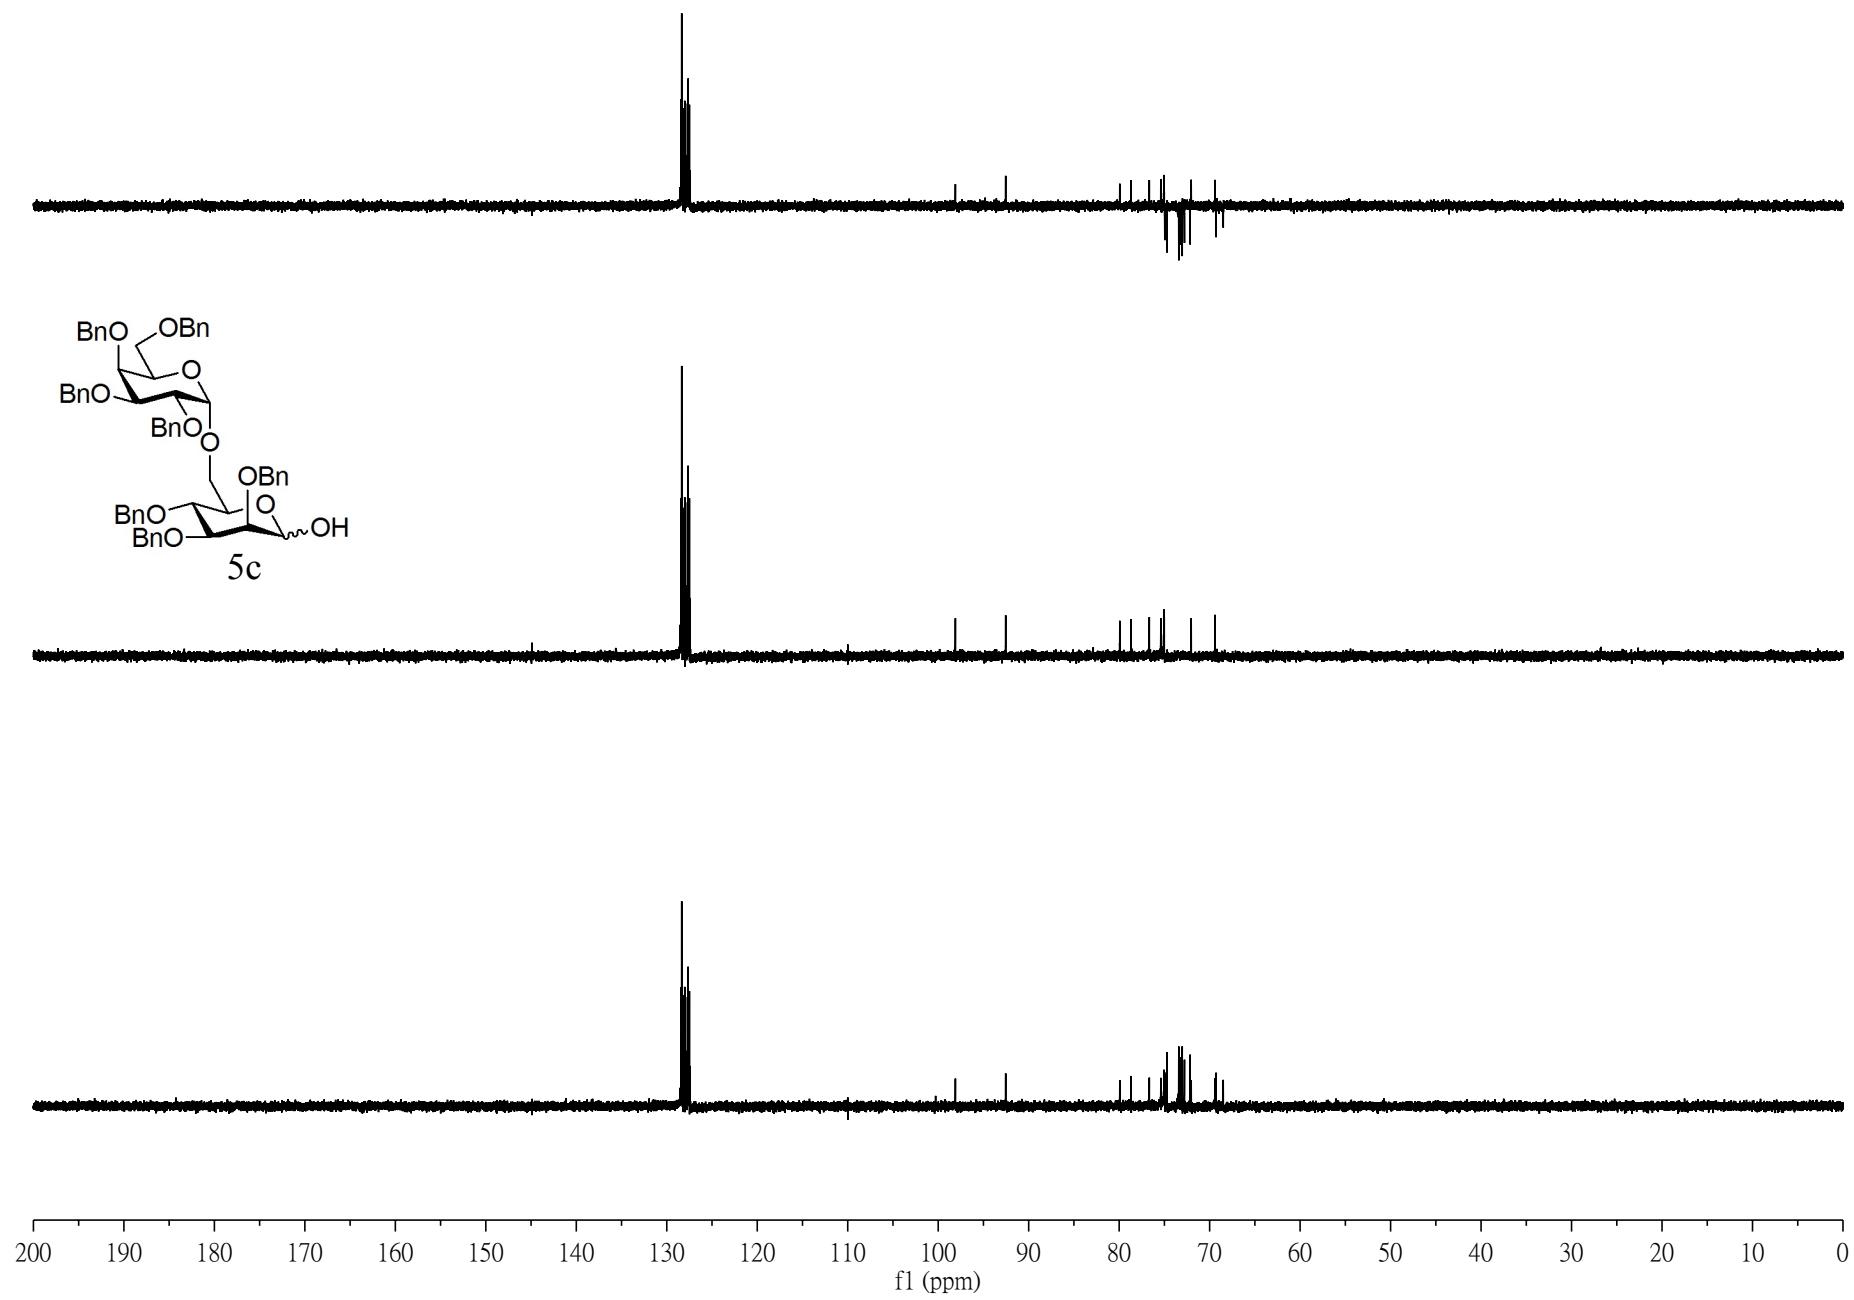

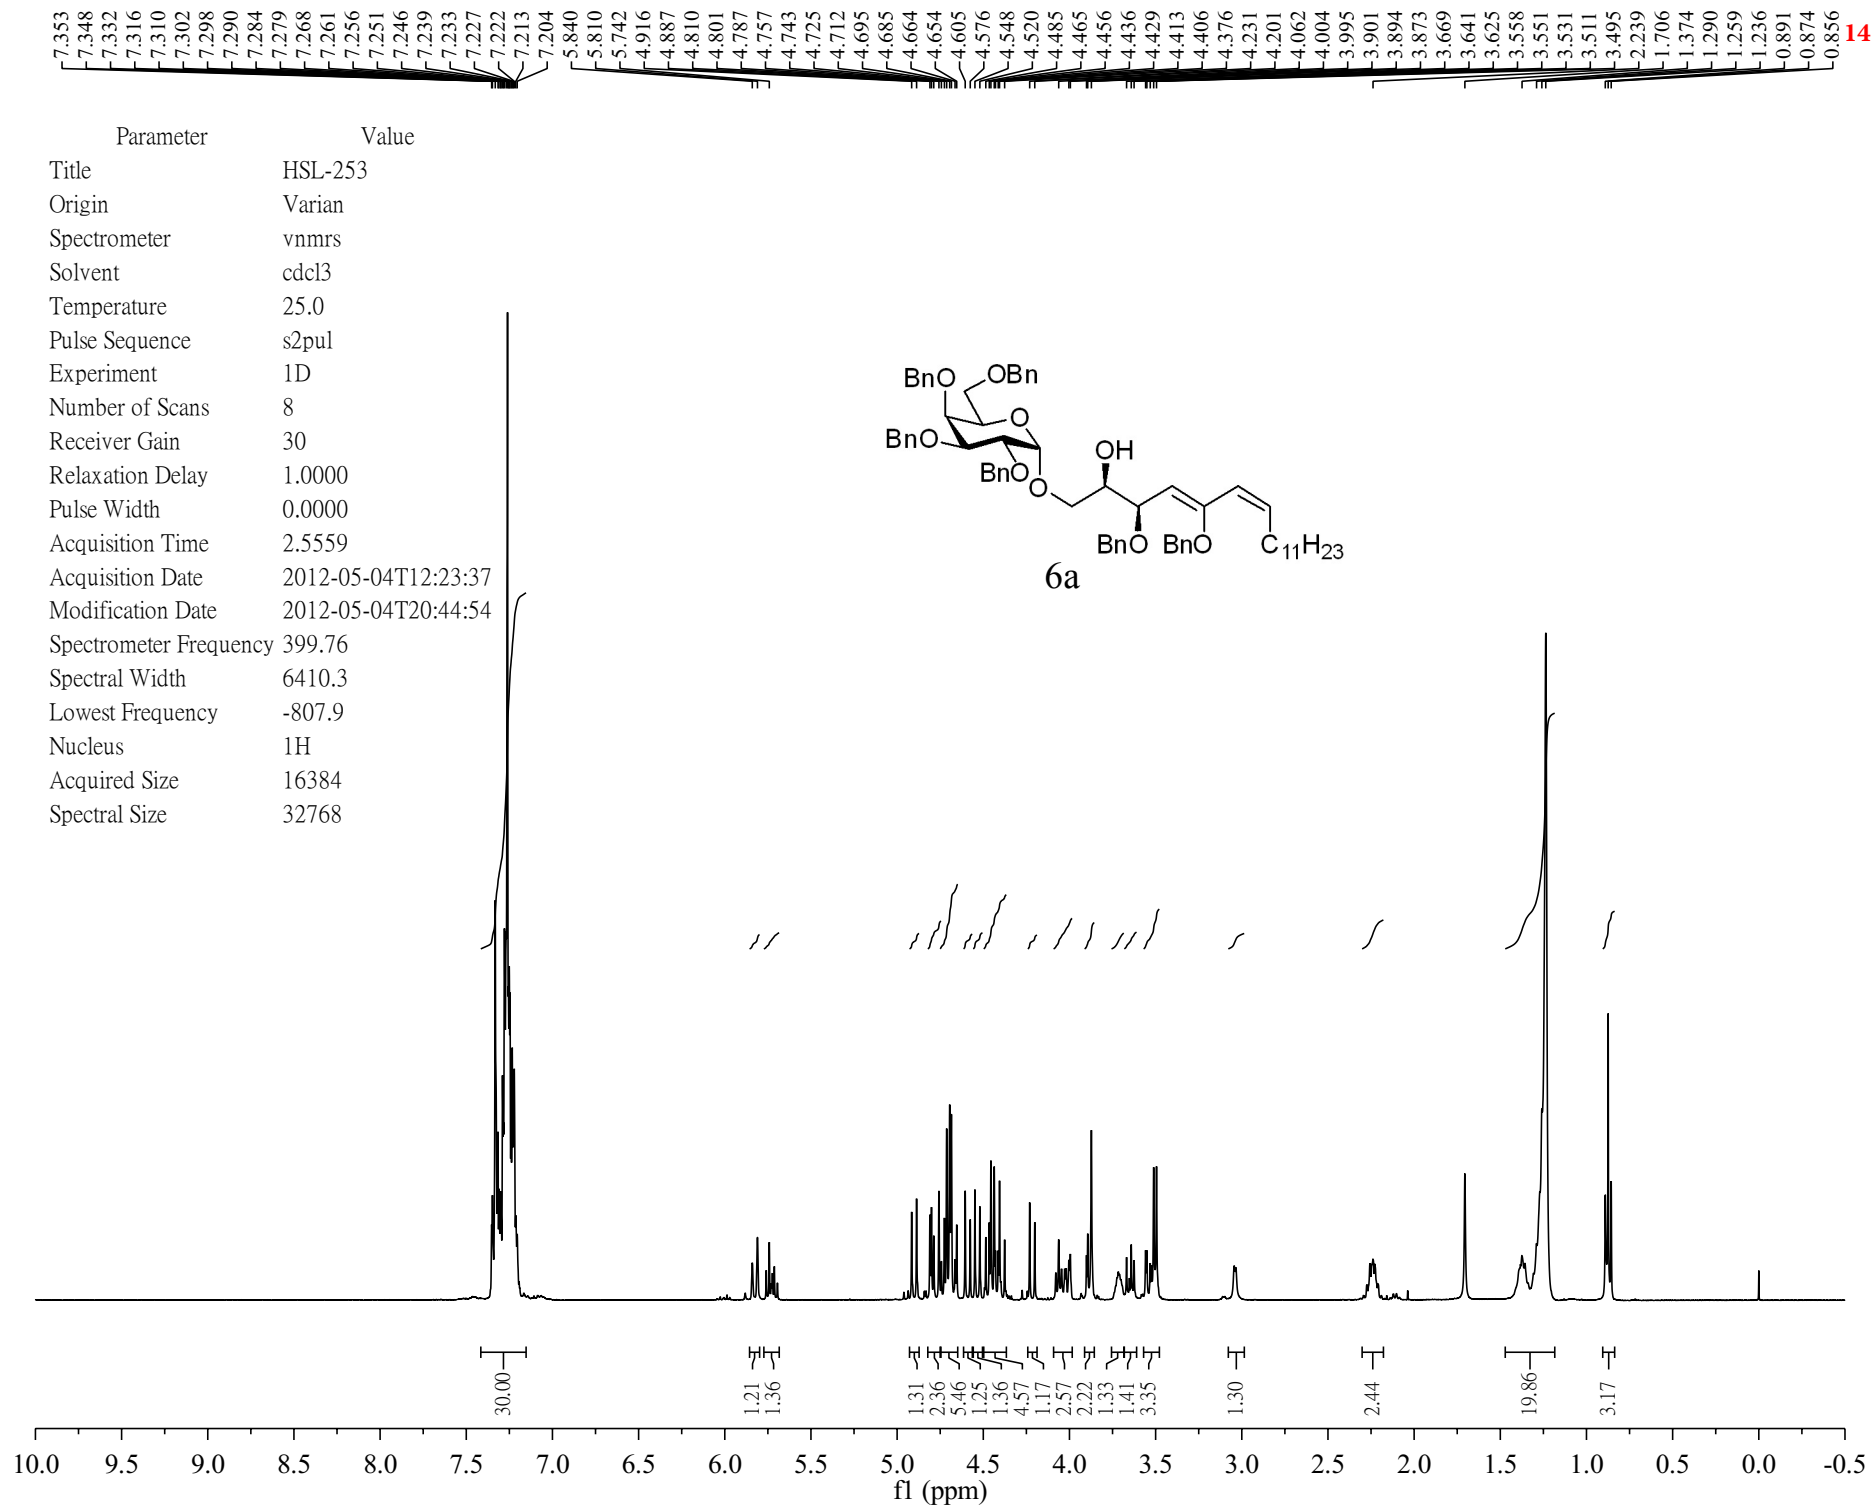

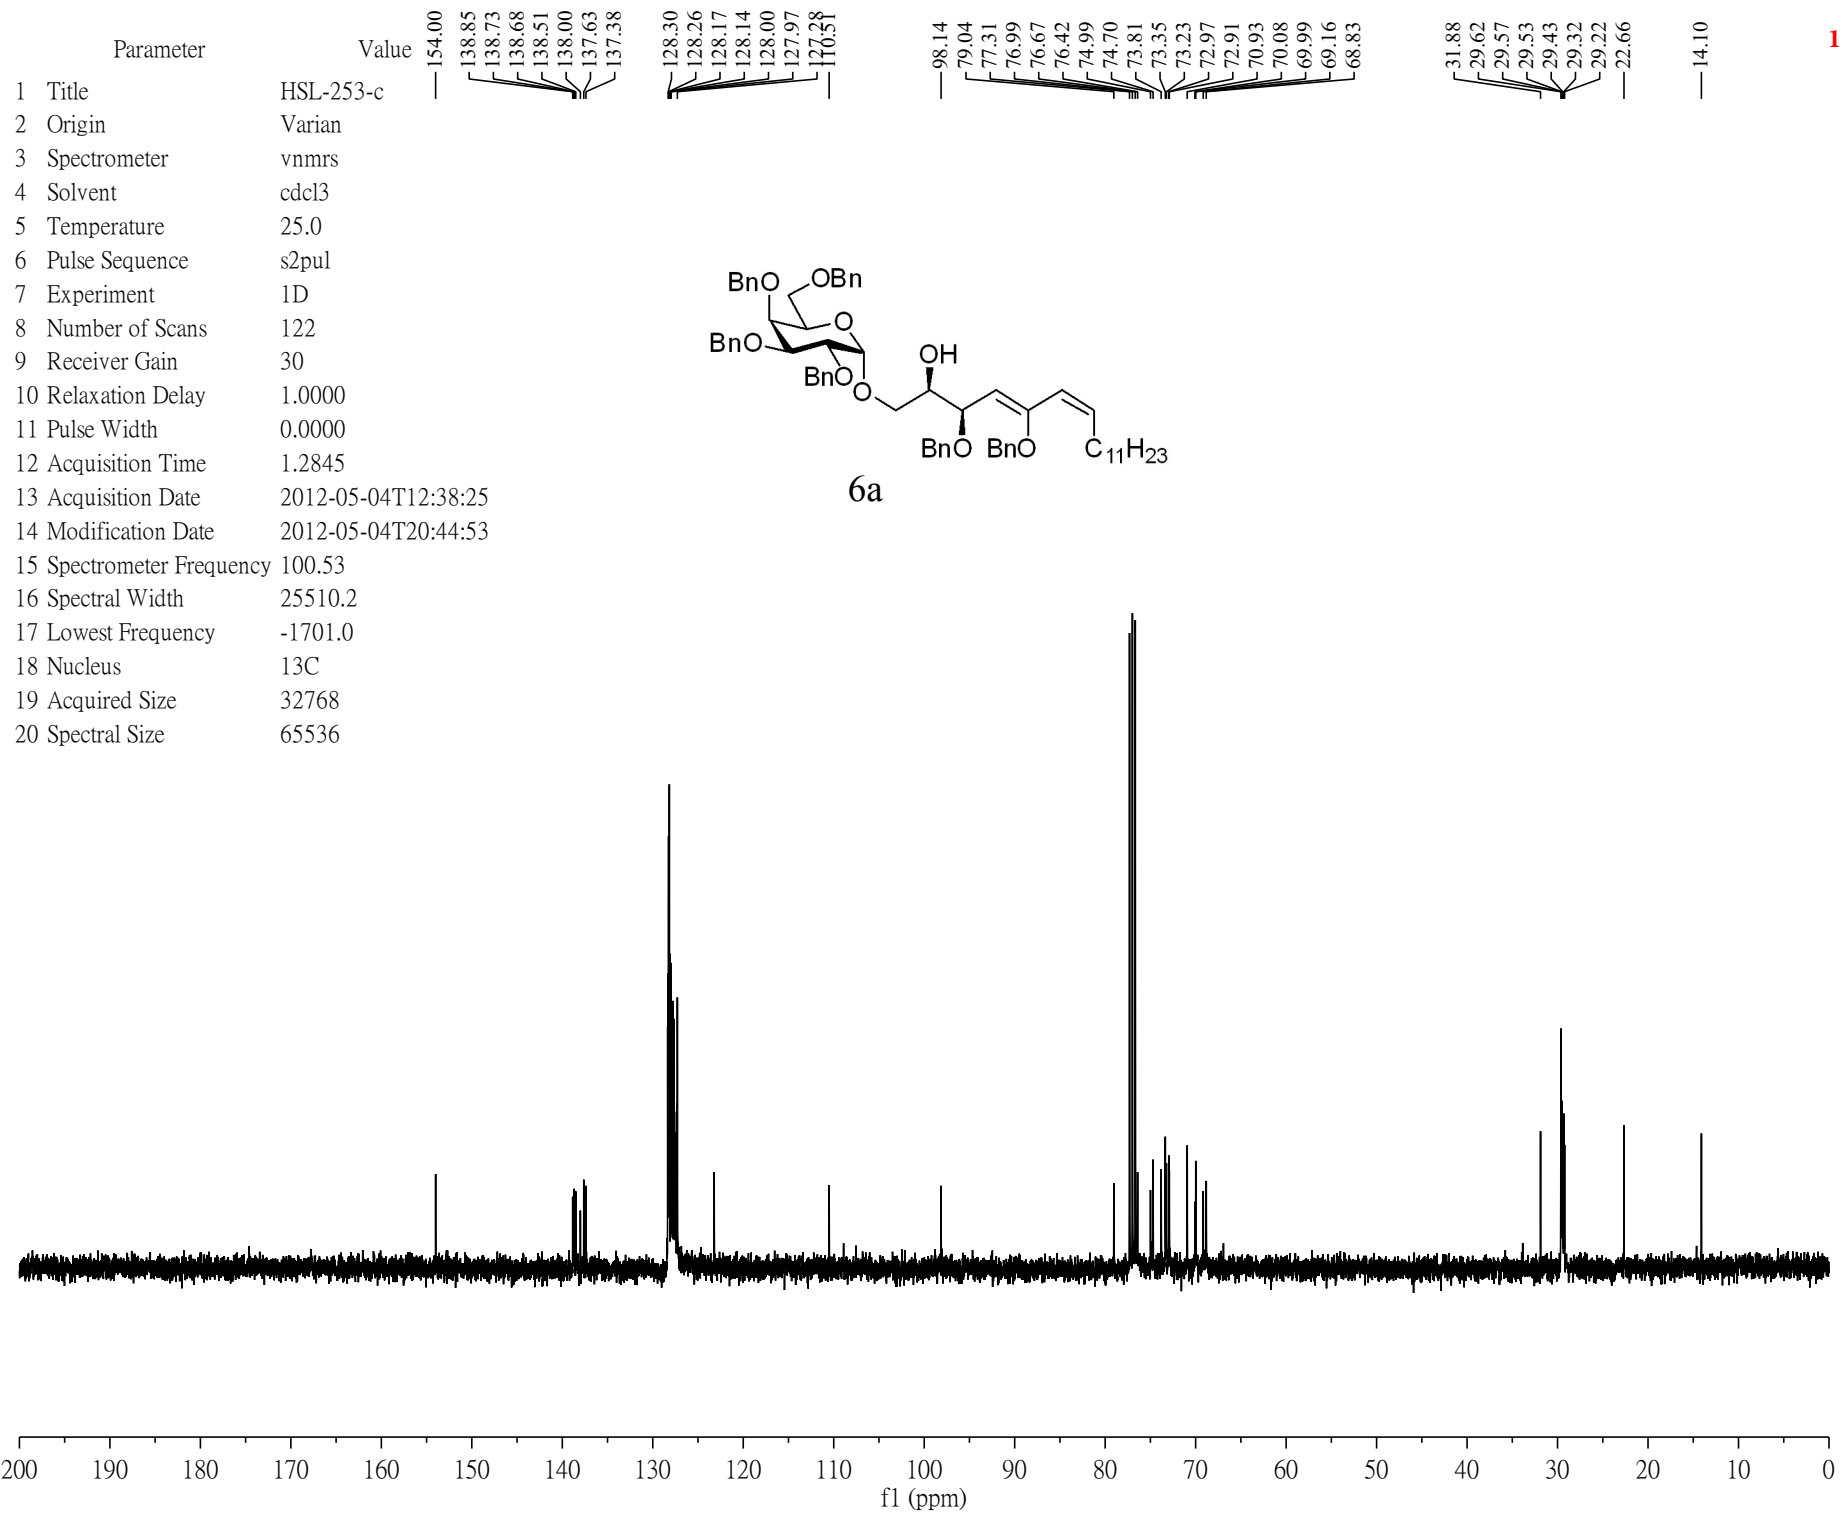

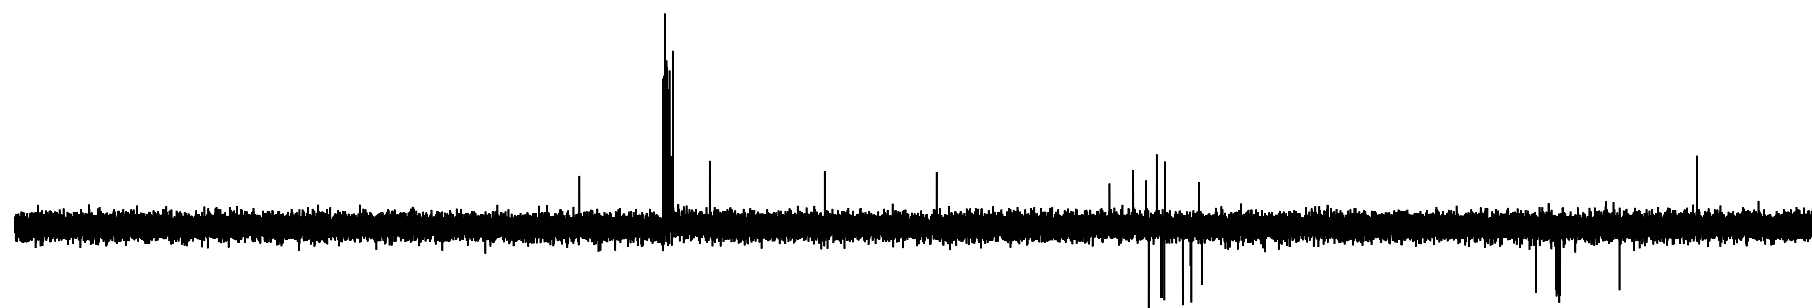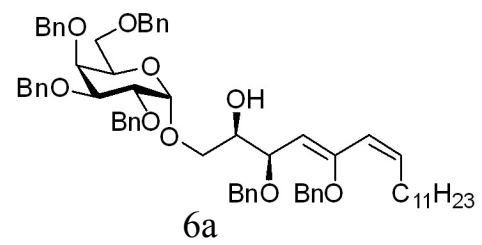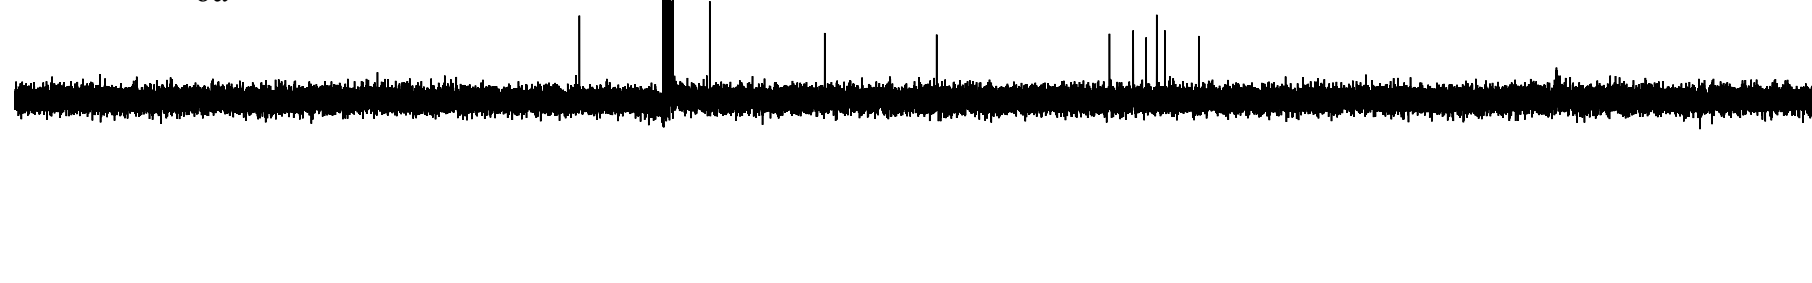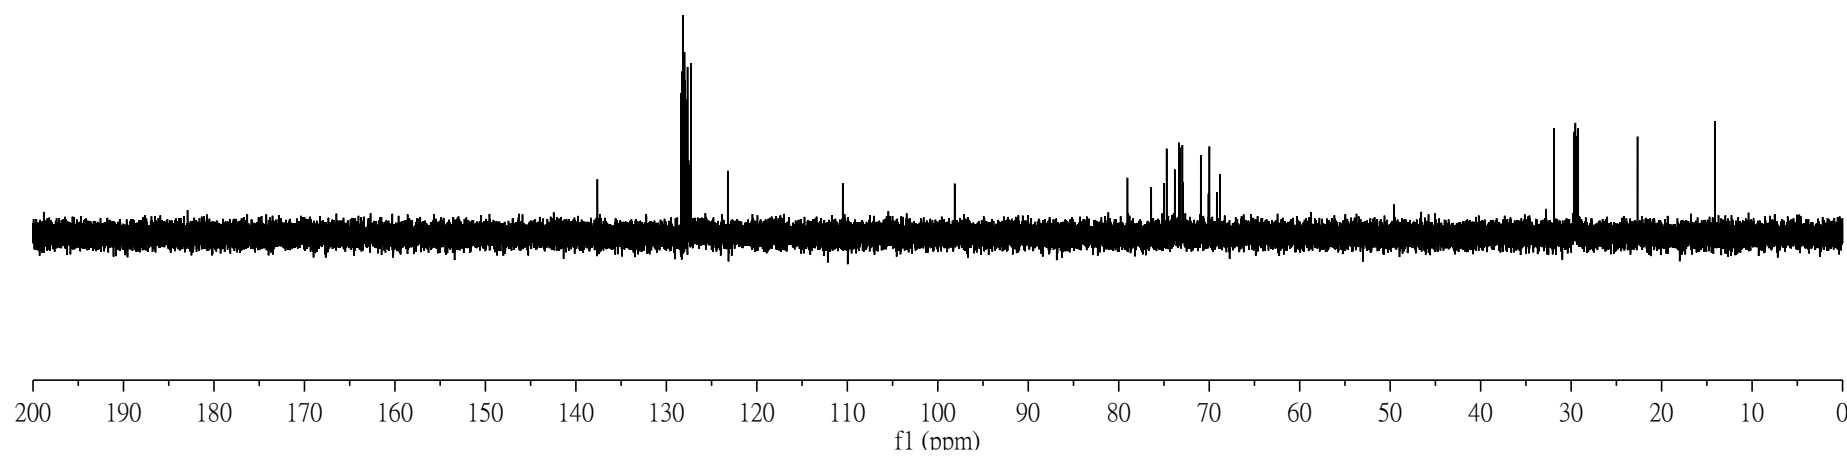



| Parameter              | Value (f2, f1)   |
|------------------------|------------------|
| Origin                 | Varian           |
| Spectrometer           | nmrs             |
| Solvent                | cdcl3            |
| Temperature            | 25.0             |
| Pulse Sequence         | gCOSY            |
| Experiment             | 2D-COSY          |
| Number of Scans        | 1                |
| Receiver Gain          | 30               |
| Relaxation Delay       | 1.0000           |
| Acquisition Time       | 0.1501           |
| Spectrometer Frequency | (399.76, 399.76) |
| Spectral Width         | (6410.3, 6410.3) |
| Lowest Frequency       | (-807.9, -807.9) |
| Nucleus                | (1H, 1H)         |
| Acquired Size          | (962, 128)       |
| Spectral Size          | (1024, 1024)     |

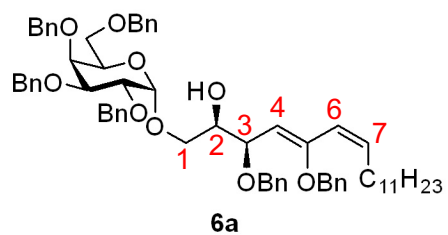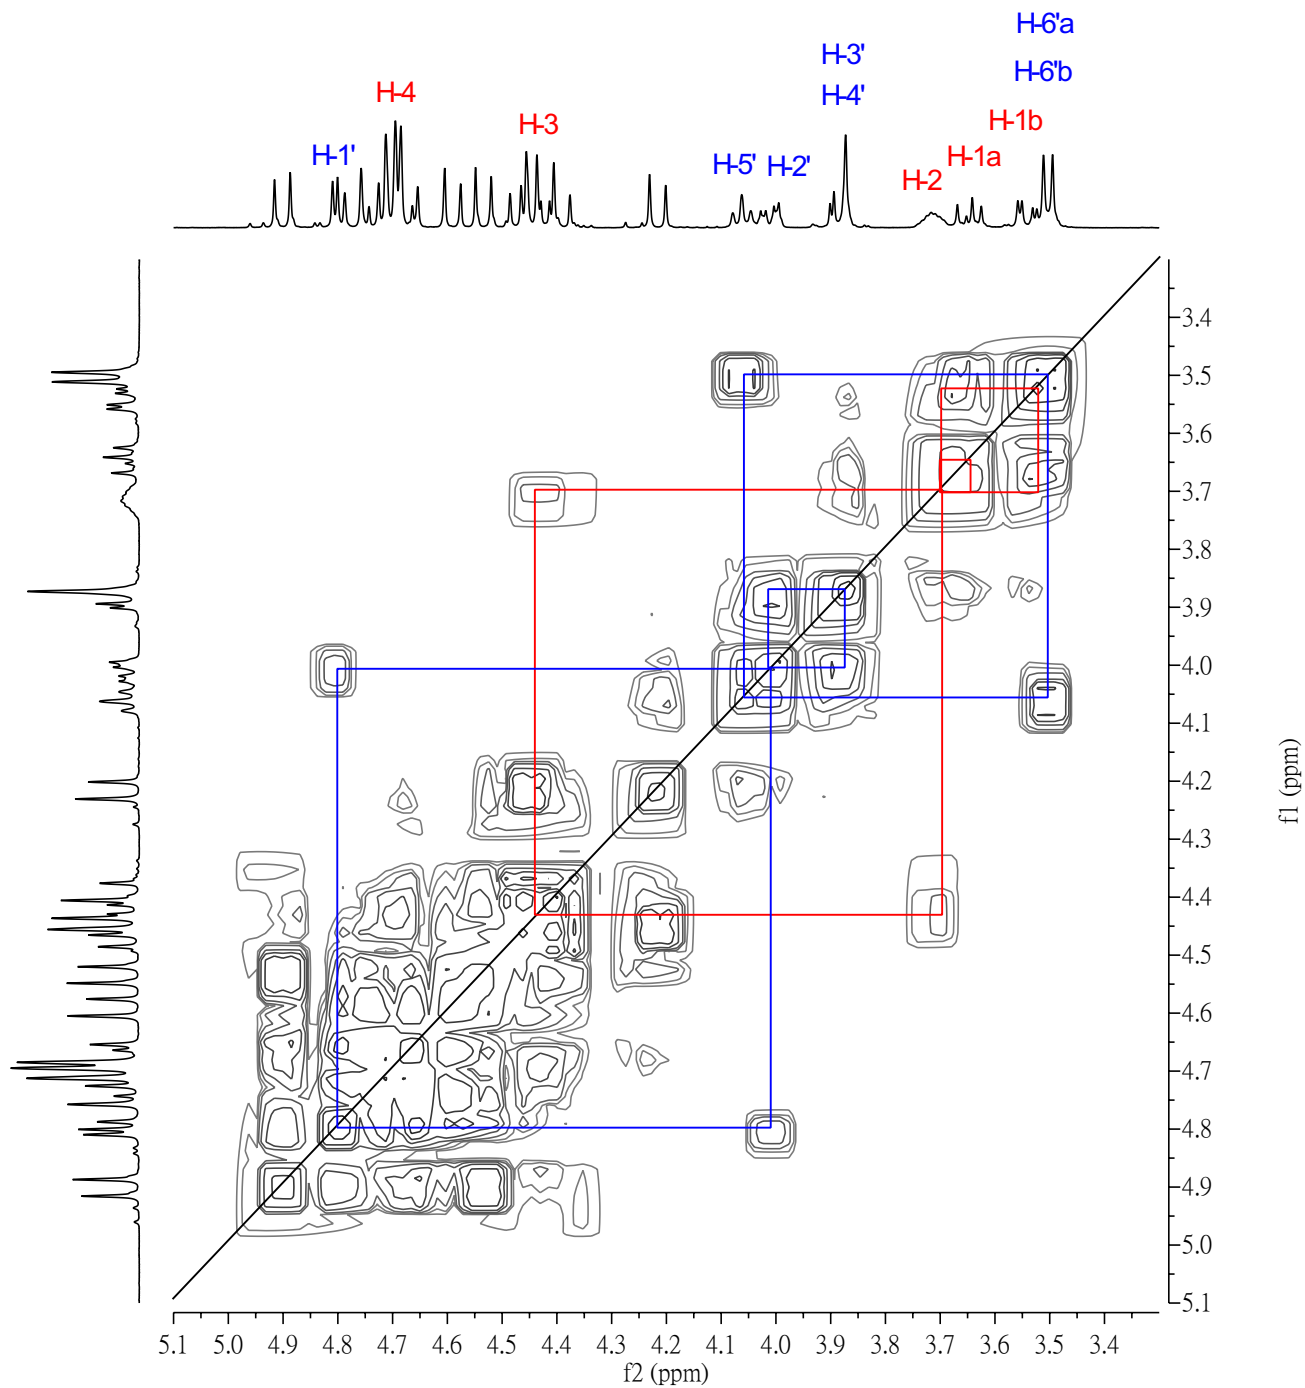

| Parameter              | Value (f2, f1)    |
|------------------------|-------------------|
| Origin                 | Varian            |
| Spectrometer           | nmrs              |
| Solvent                | cdcl3             |
| Temperature            | 25.0              |
| Pulse Sequence         | gHSQC             |
| Experiment             | 2D-HSQC-EDITED    |
| Number of Scans        | 4                 |
| Receiver Gain          | 30                |
| Relaxation Delay       | 1.0000            |
| Acquisition Time       | 0.1501            |
| Spectrometer Frequency | (399.76, 100.53)  |
| Spectral Width         | (6410.3, 17086.7) |
| Lowest Frequency       | (-806.6, -1004.5) |
| Nucleus                | (1H, 13C)         |
| Acquired Size          | (962, 128)        |
| Spectral Size          | (1024, 1024)      |

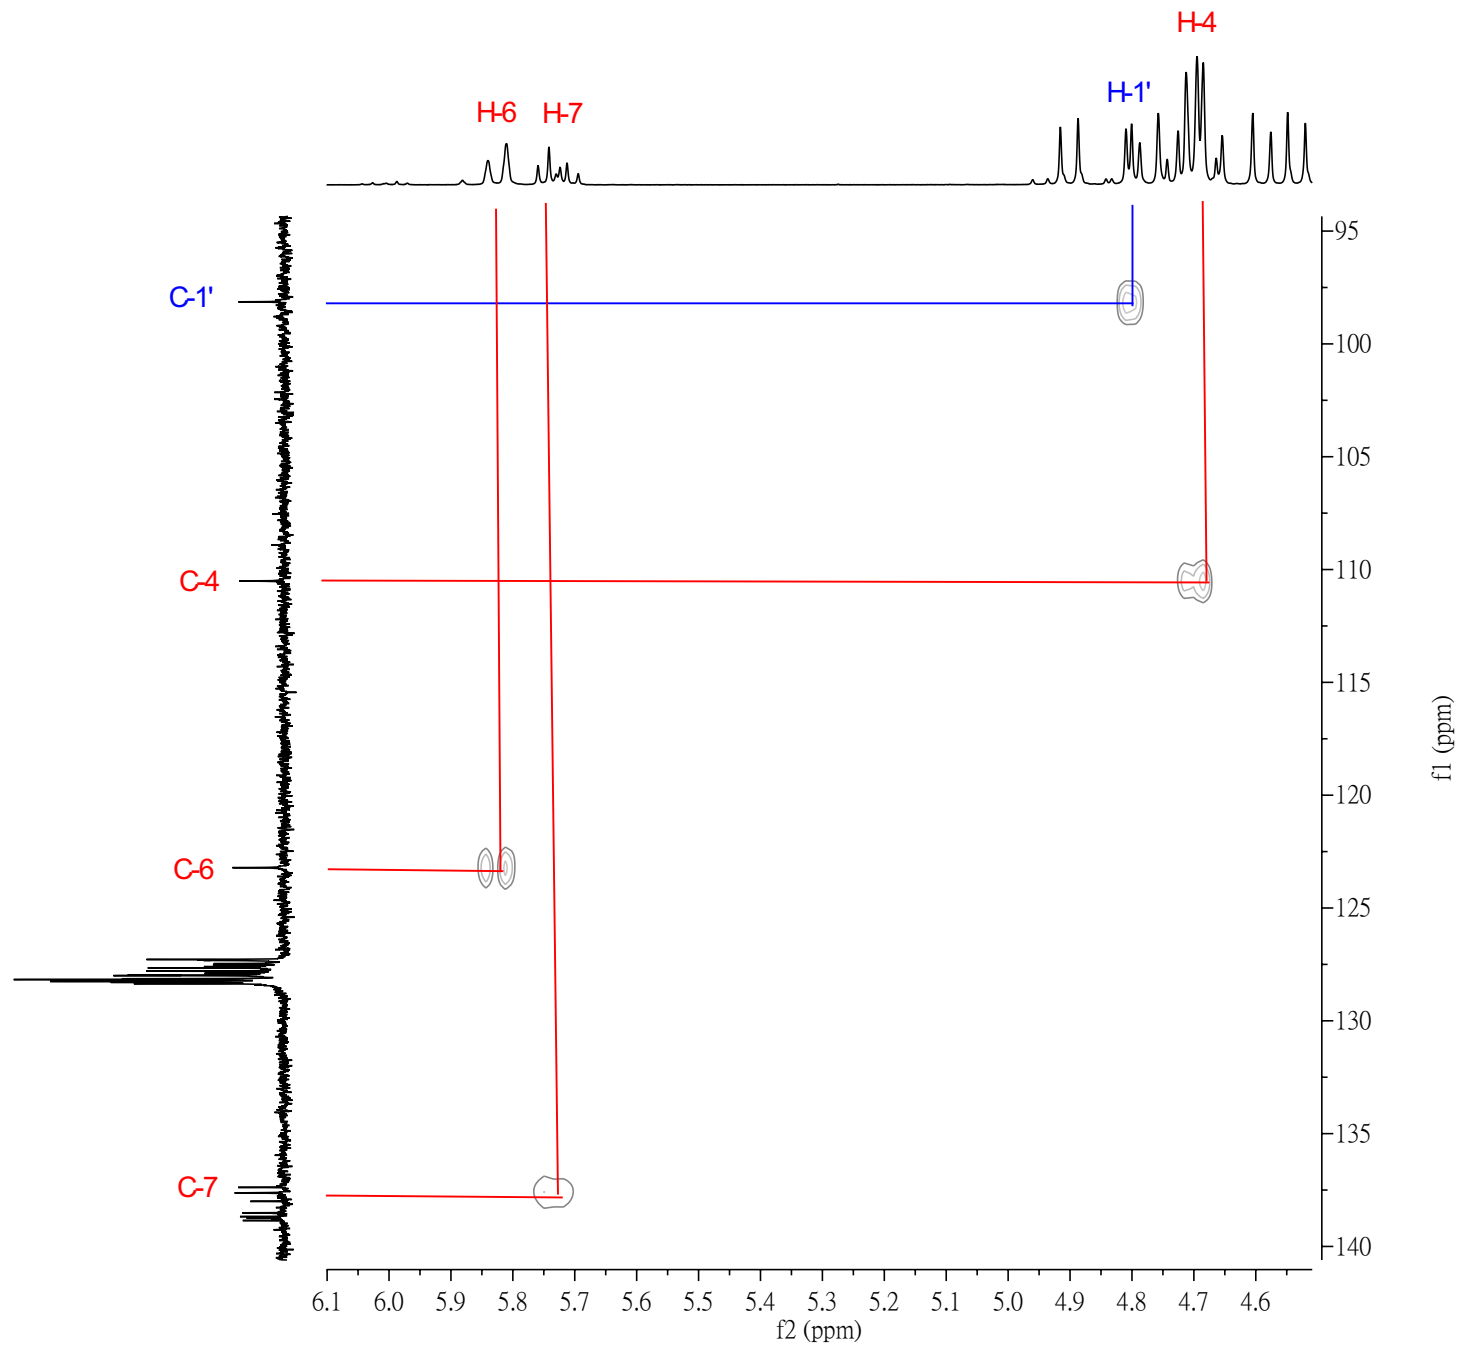

7.347  
7.336  
7.326  
7.323  
7.312  
7.299  
7.293  
7.291  
7.279  
7.270  
7.260  
7.255  
7.248  
7.242  
7.235  
7.229  
7.217  
5.866  
5.846  
5.746  
5.727  
4.923  
4.904  
4.801  
4.795  
4.783  
4.774  
4.759  
4.739  
4.730  
4.725  
4.719  
4.679  
4.659  
4.642  
4.559  
4.540  
4.459  
4.450  
4.443  
4.437  
4.435  
4.417  
4.375  
4.355  
4.215  
4.195  
4.046  
4.033  
4.027  
4.016  
4.010  
3.926  
3.901  
3.897  
3.880  
3.677  
3.665  
3.642  
3.638  
3.494  
3.483  
2.267  
2.255  
2.251  
1.685  
1.379  
1.367  
1.295  
1.283  
1.241  
0.895  
0.883  
0.871

| Parameter              | Value               |
|------------------------|---------------------|
| Origin                 | Varian              |
| Spectrometer           | inova               |
| Solvent                | CDC13               |
| Temperature            | 29.0                |
| Experiment             | 1D                  |
| Number of Scans        | 32                  |
| Receiver Gain          | 30                  |
| Relaxation Delay       | 1.0000              |
| Pulse Width            | 0.0000              |
| Acquisition Date       | 2012-12-18T13:14:46 |
| Modification Date      | 2013-01-03T13:21:56 |
| Spectrometer Frequency | 599.94              |
| Spectral Width         | 8000.0              |
| Lowest Frequency       | -493.1              |
| Nucleus                | 1H                  |
| Acquired Size          | 16000               |
| Spectral Size          | 32768               |

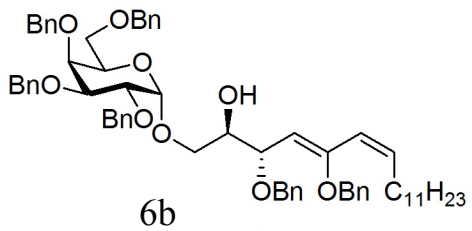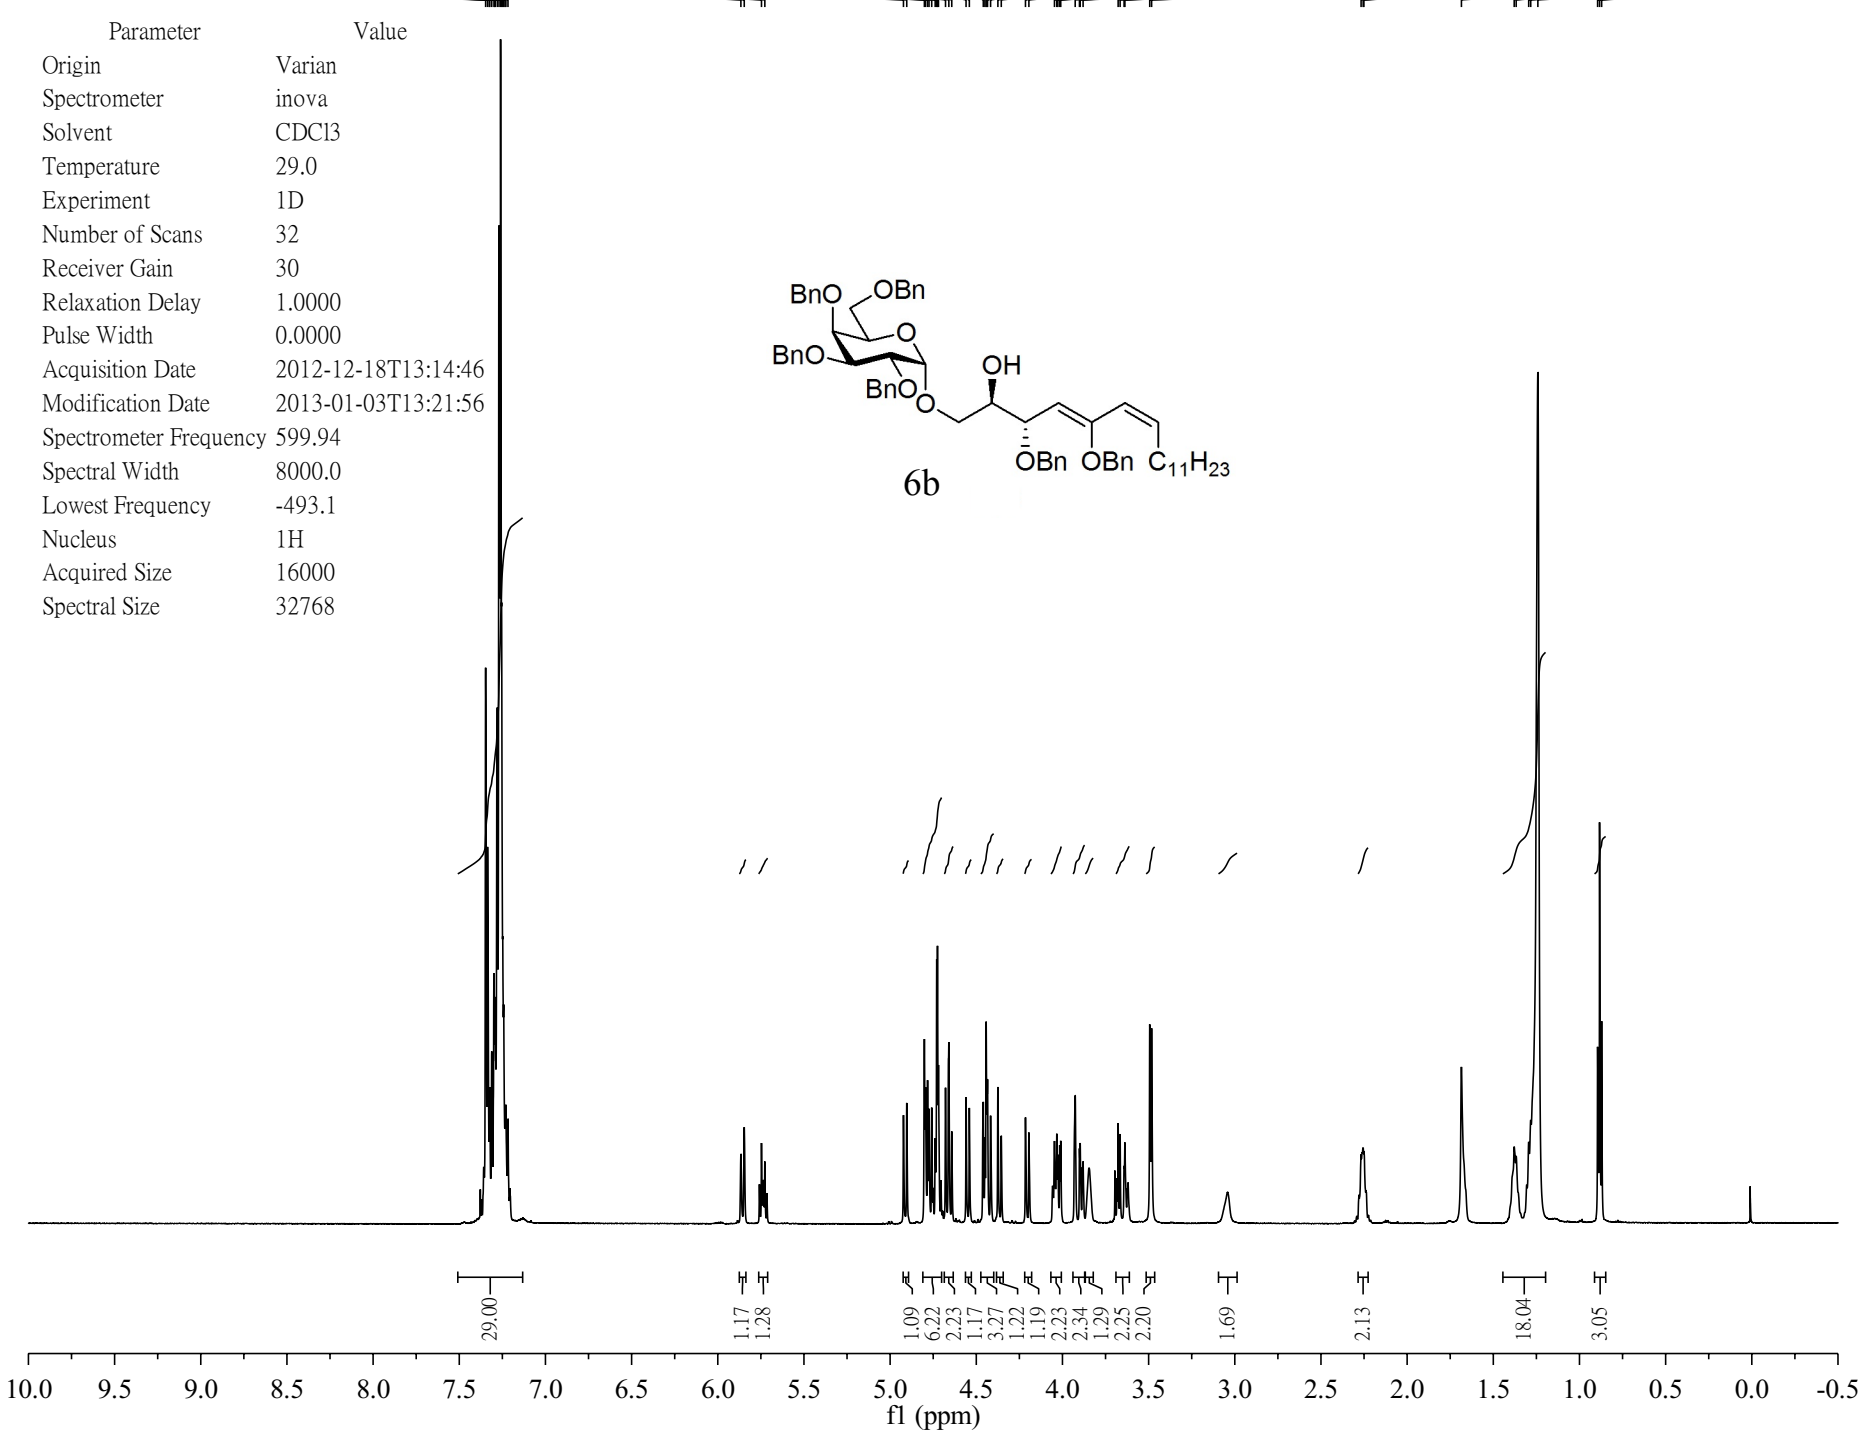

10.0 9.5 9.0 8.5 8.0 7.5 7.0 6.5 6.0 5.5 5.0 4.5 4.0 3.5 3.0 2.5 2.0 1.5 1.0 0.5 0.0 -0.5  
fl (ppm)

| Parameter              | Value               |
|------------------------|---------------------|
| Origin                 | Varian              |
| Spectrometer           | inova               |
| Solvent                | CDC13               |
| Temperature            | 22.0                |
| Experiment             | 1D                  |
| Number of Scans        | 480                 |
| Receiver Gain          | 58                  |
| Relaxation Delay       | 0.5000              |
| Pulse Width            | 0.0000              |
| Acquisition Date       | 2012-12-18T14:58:54 |
| Modification Date      | 2013-01-03T13:21:46 |
| Spectrometer Frequency | 150.87              |
| Spectral Width         | 40000.0             |
| Lowest Frequency       | -4041.0             |
| Nucleus                | <sup>13</sup> C     |
| Acquired Size          | 39987               |
| Spectral Size          | 131072              |

- 151.52
- 138.766
- 138.707
- 138.566
- 138.330
- 137.904
- 137.499
- 128.344
- 128.311
- 128.192
- 128.153
- 128.042
- 127.961
- 127.776
- 117.643
- 117.122
- 98.174
- 79.065
- 77.202
- 76.991
- 76.779
- 76.313
- 74.826
- 74.704
- 73.886
- 73.463
- 73.326
- 72.945
- 72.282
- 71.079
- 70.318
- 69.970
- 69.330
- 68.717
- 31.890
- 29.629
- 29.596
- 29.550
- 29.435
- 29.332
- 29.200
- 22.670
- 14.122

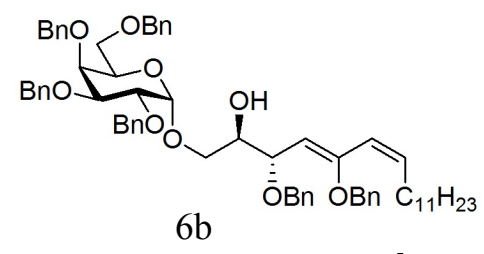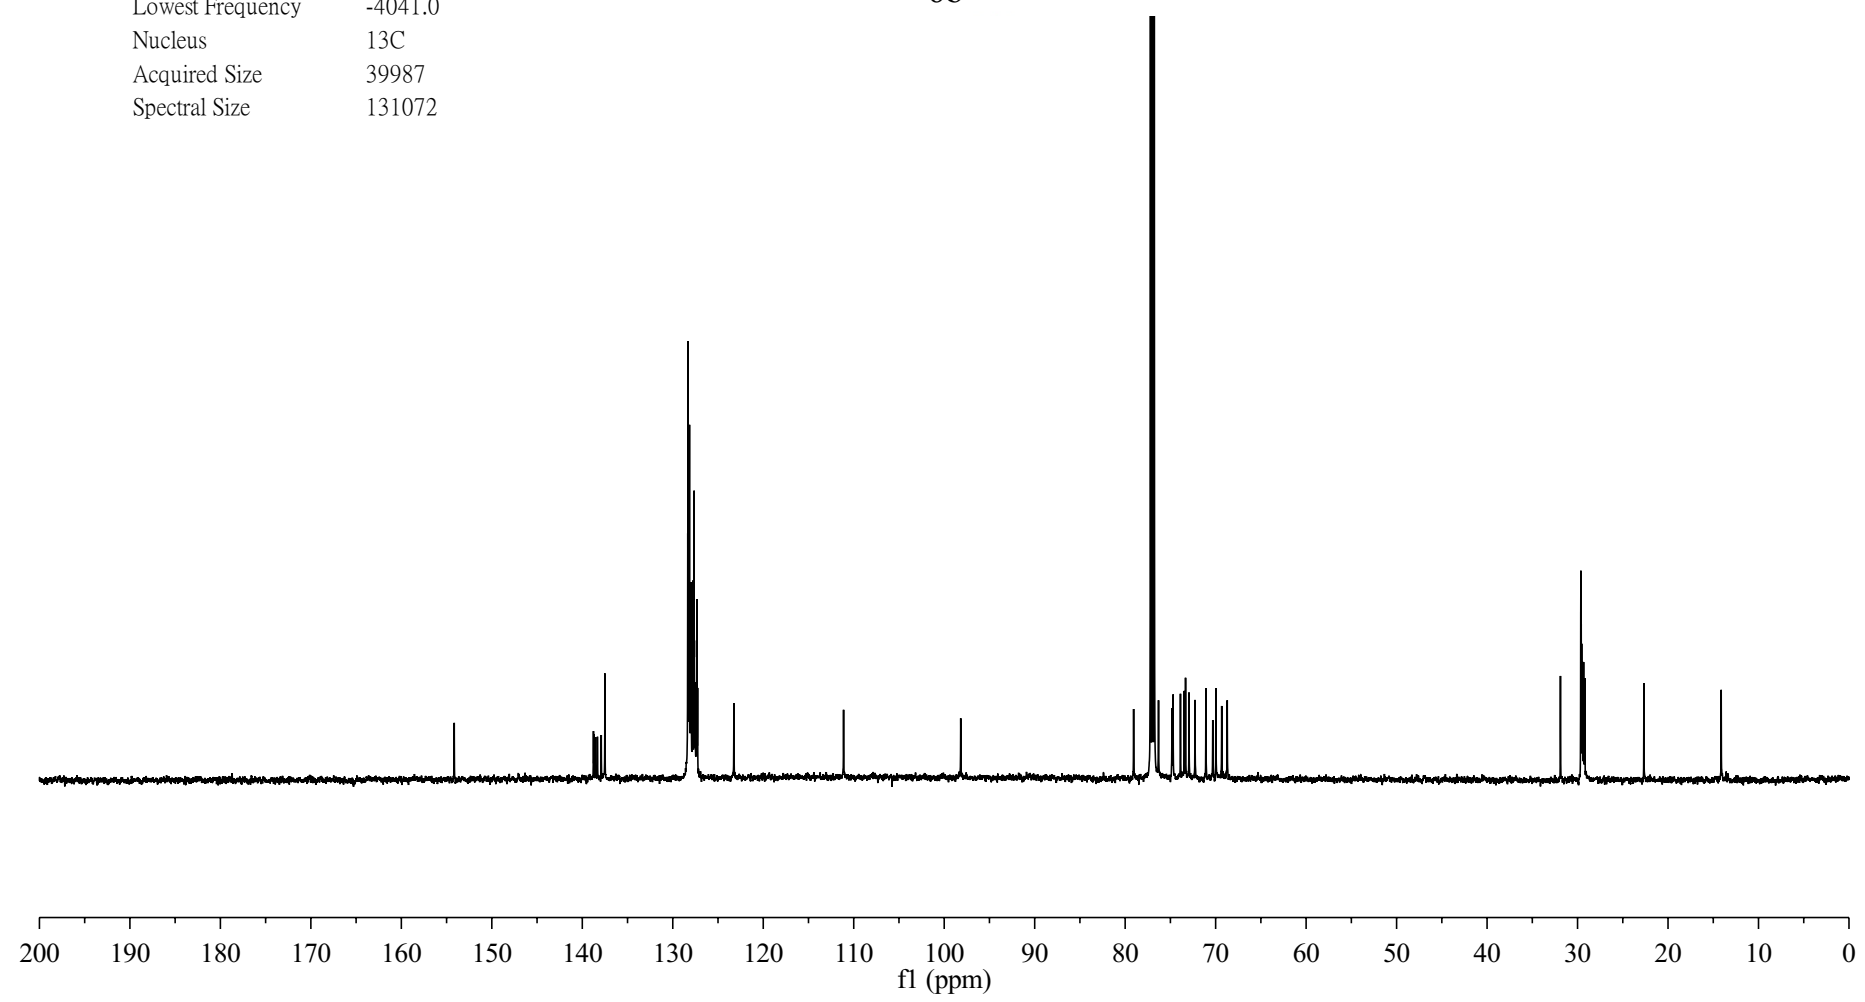

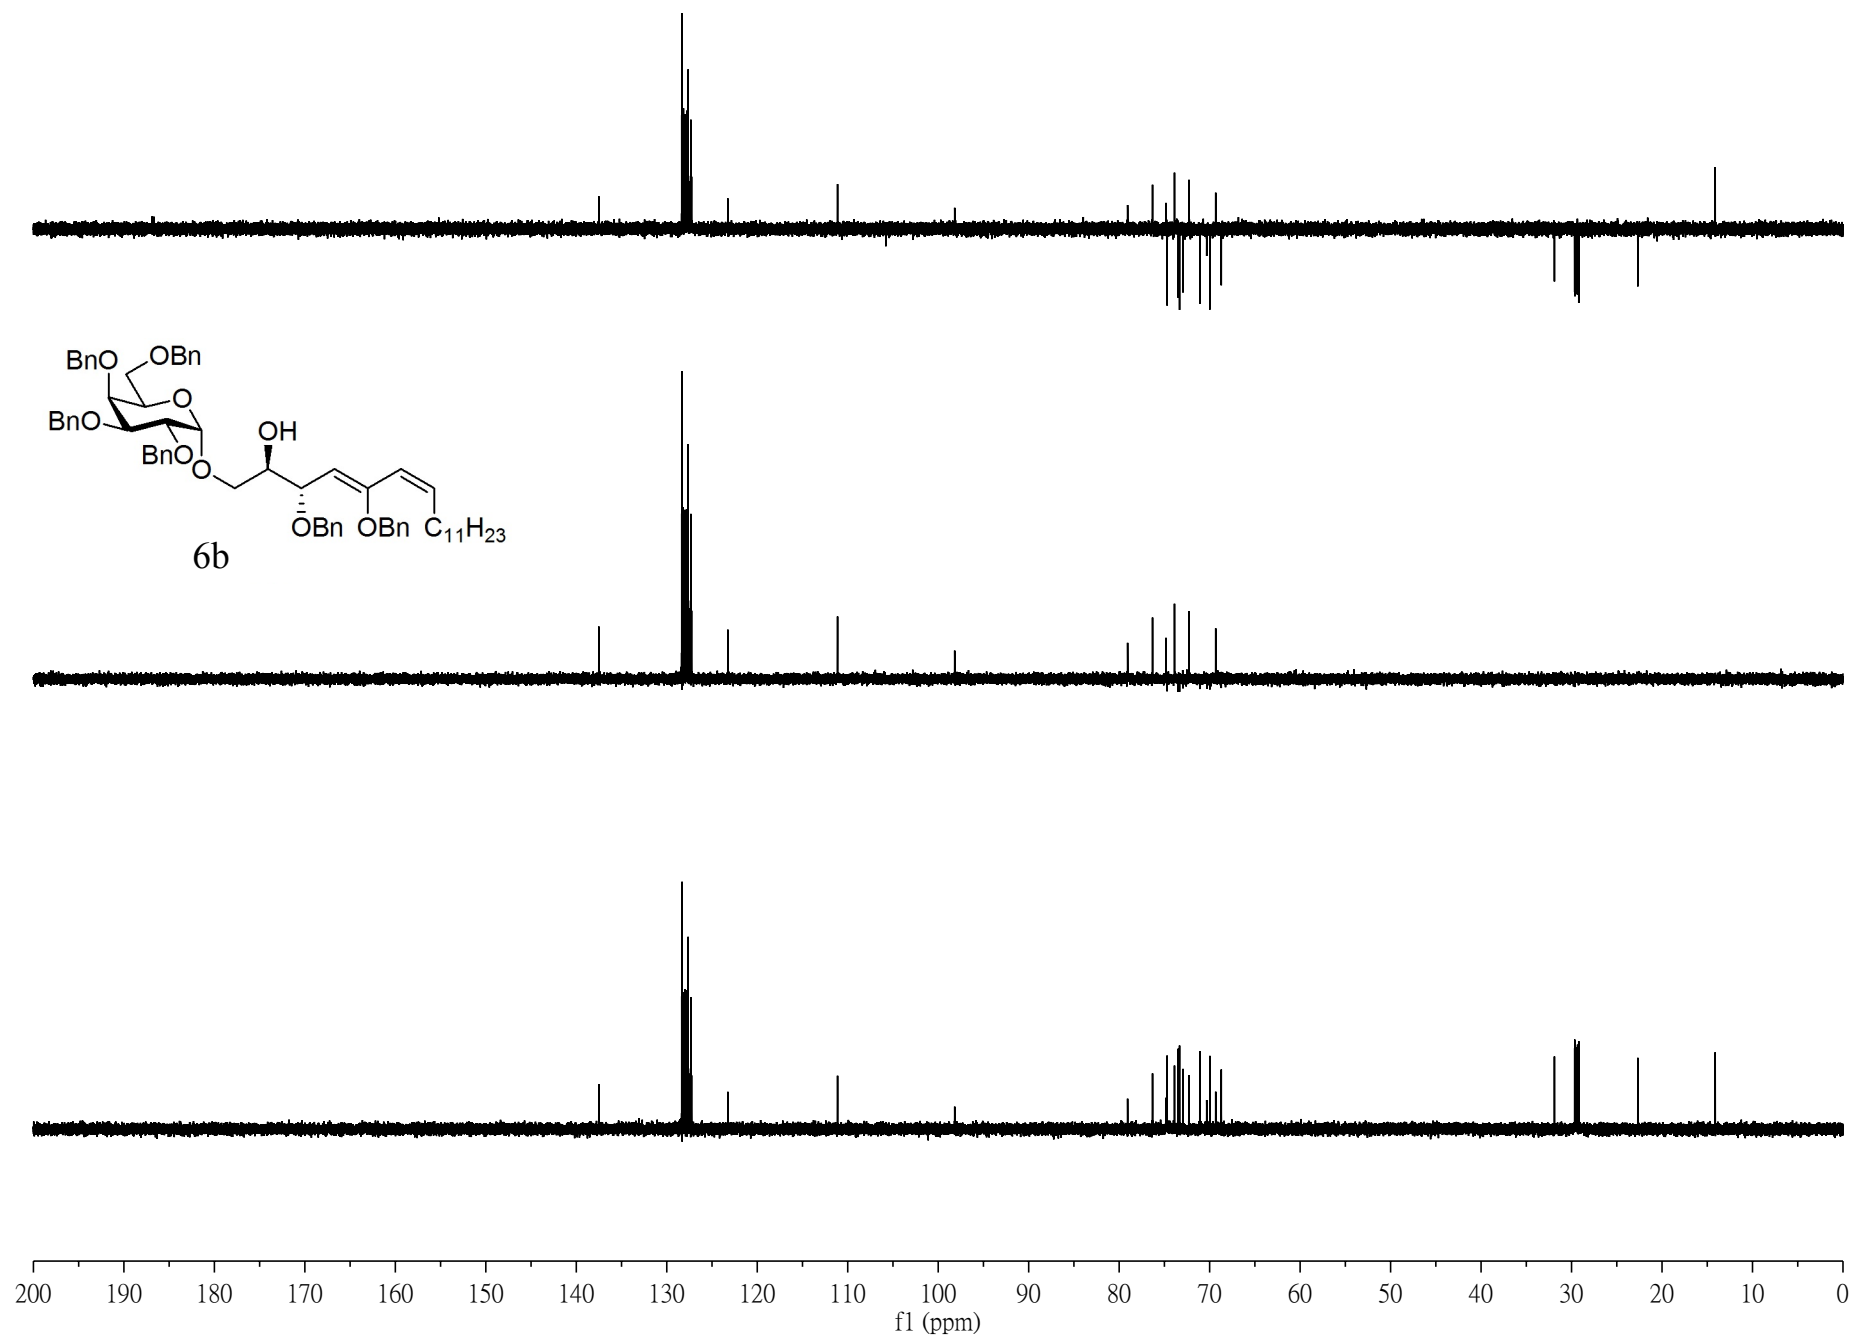

| Parameter              | Value (f2, f1)   |
|------------------------|------------------|
| Origin                 | Varian           |
| Spectrometer           | nmrs             |
| Solvent                | cdcl3            |
| Temperature            | 25.0             |
| Pulse Sequence         | gCOSY            |
| Experiment             | 2D-COSY          |
| Number of Scans        | 1                |
| Receiver Gain          | 30               |
| Relaxation Delay       | 1.0000           |
| Acquisition Time       | 0.1501           |
| Spectrometer Frequency | (399.76, 399.76) |
| Spectral Width         | (6410.3, 6410.3) |
| Lowest Frequency       | (-810.9, -810.9) |
| Nucleus                | (1H, 1H)         |
| Acquired Size          | (962, 128)       |
| Spectral Size          | (1024, 1024)     |

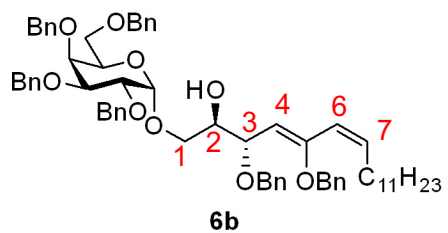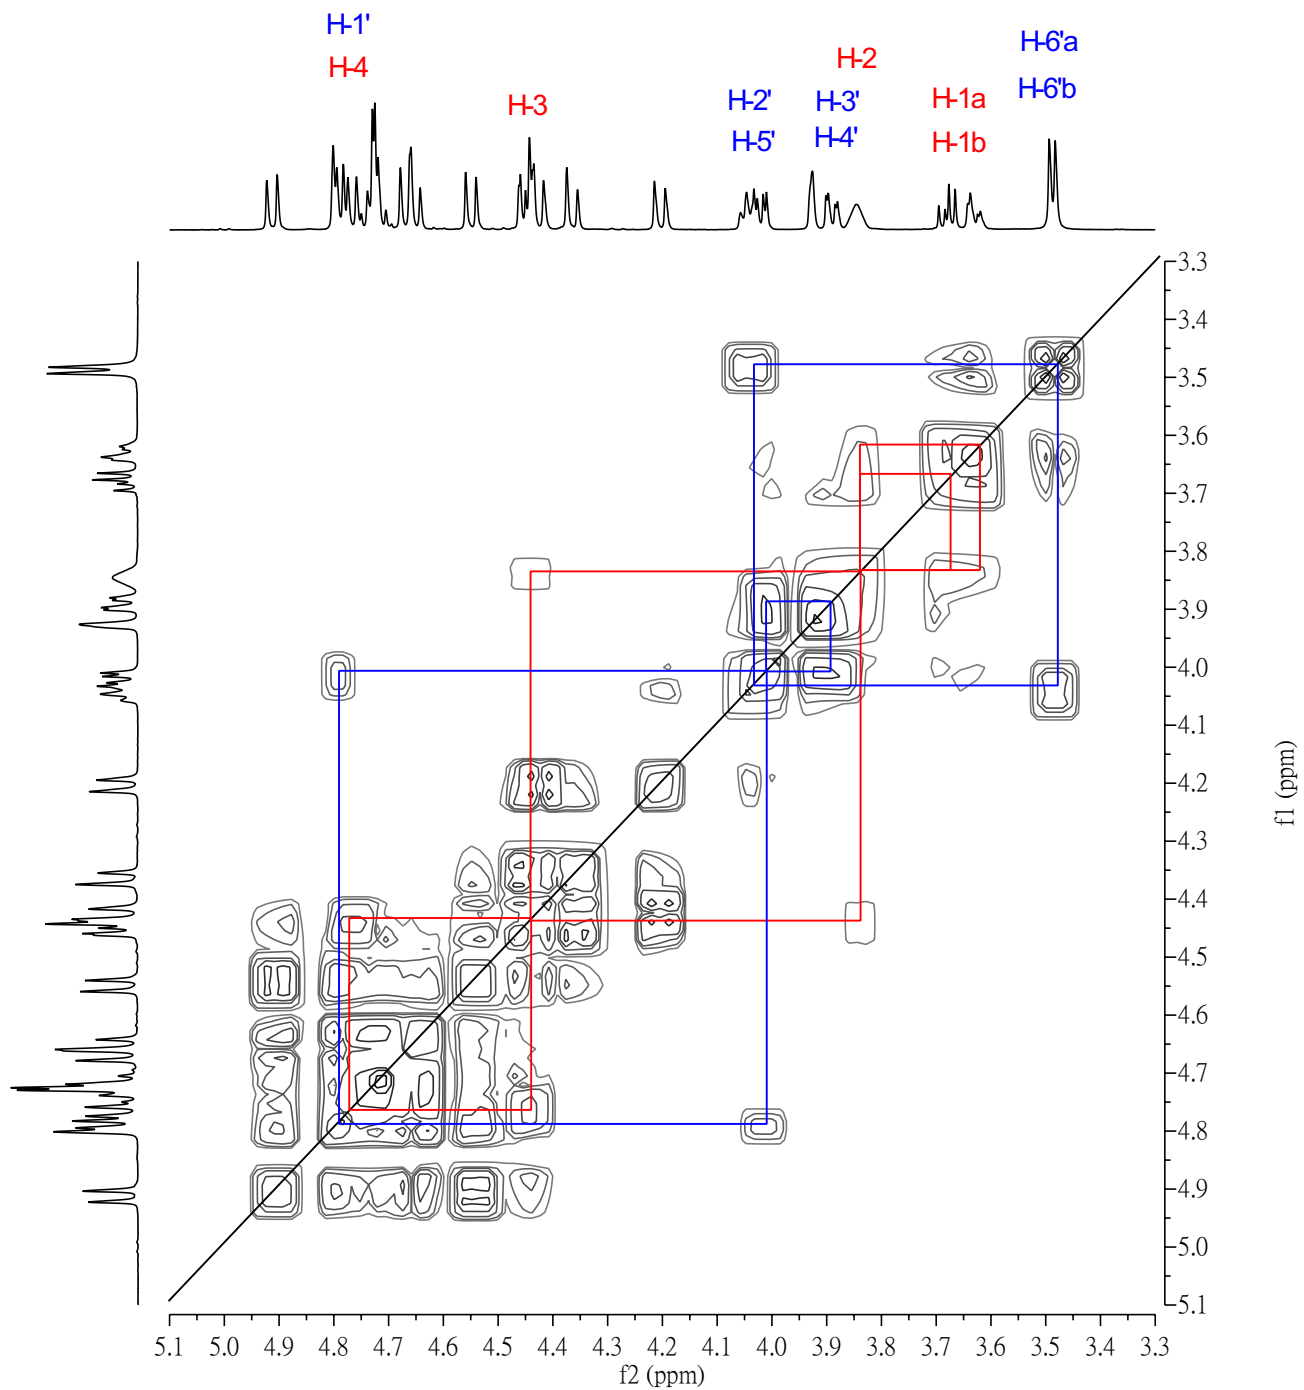

| Parameter              | Value (f2, f1)                     |
|------------------------|------------------------------------|
| Origin                 | Varian                             |
| Spectrometer           | inova                              |
| Solvent                | CDCl <sub>3</sub>                  |
| Temperature            | 29.0                               |
| Pulse Sequence         | gHSQC                              |
| Experiment             | 2D-HSQC                            |
| Number of Scans        | 16                                 |
| Receiver Gain          | 50                                 |
| Relaxation Delay       | 1.0000                             |
| Acquisition Time       | 0.1280                             |
| Spectrometer Frequency | (599.94, 150.86)                   |
| Spectral Width         | (8000.0, 25641.0)                  |
| Lowest Frequency       | (-491.2, -1529.6)                  |
| Nucleus                | ( <sup>1</sup> H, <sup>13</sup> C) |
| Acquired Size          | (1024, 128)                        |
| Spectral Size          | (1024, 1024)                       |

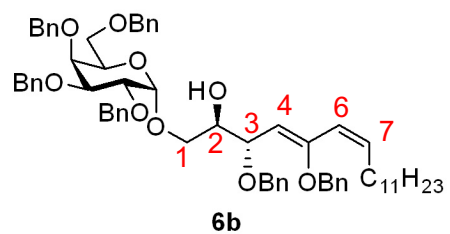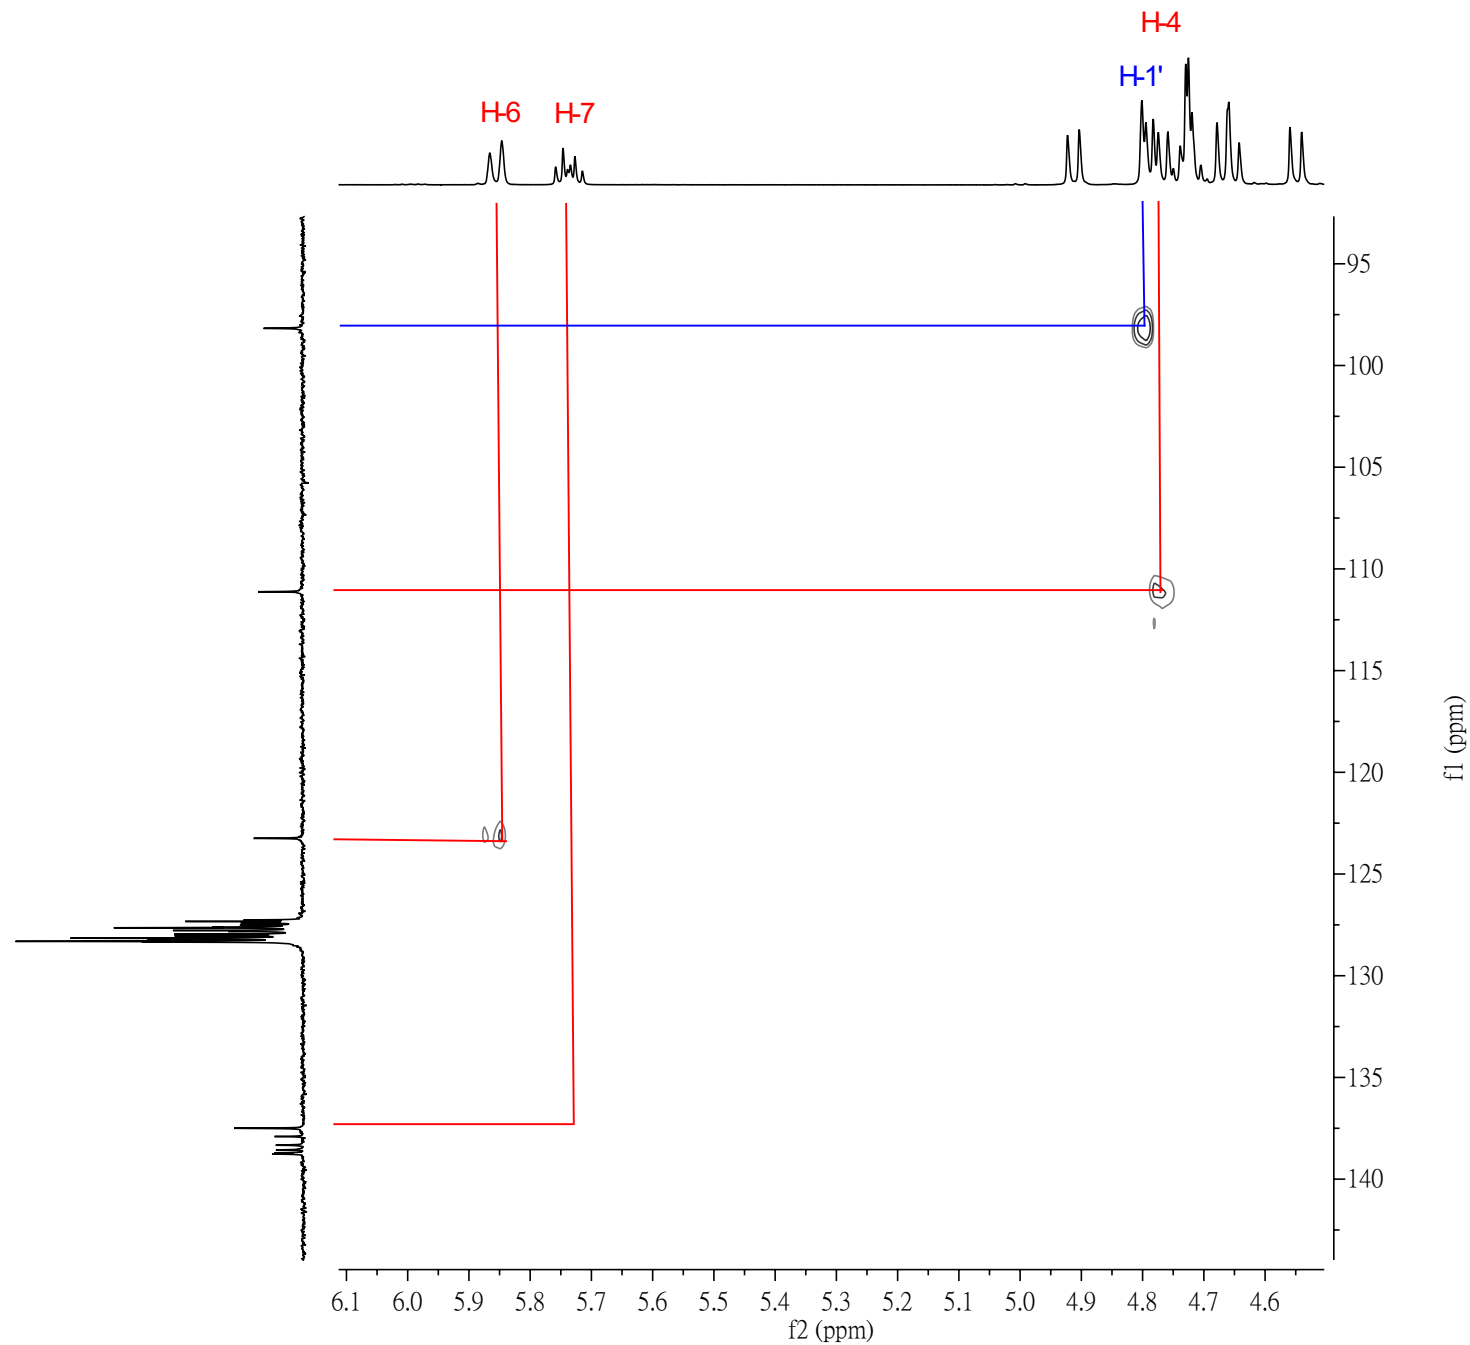

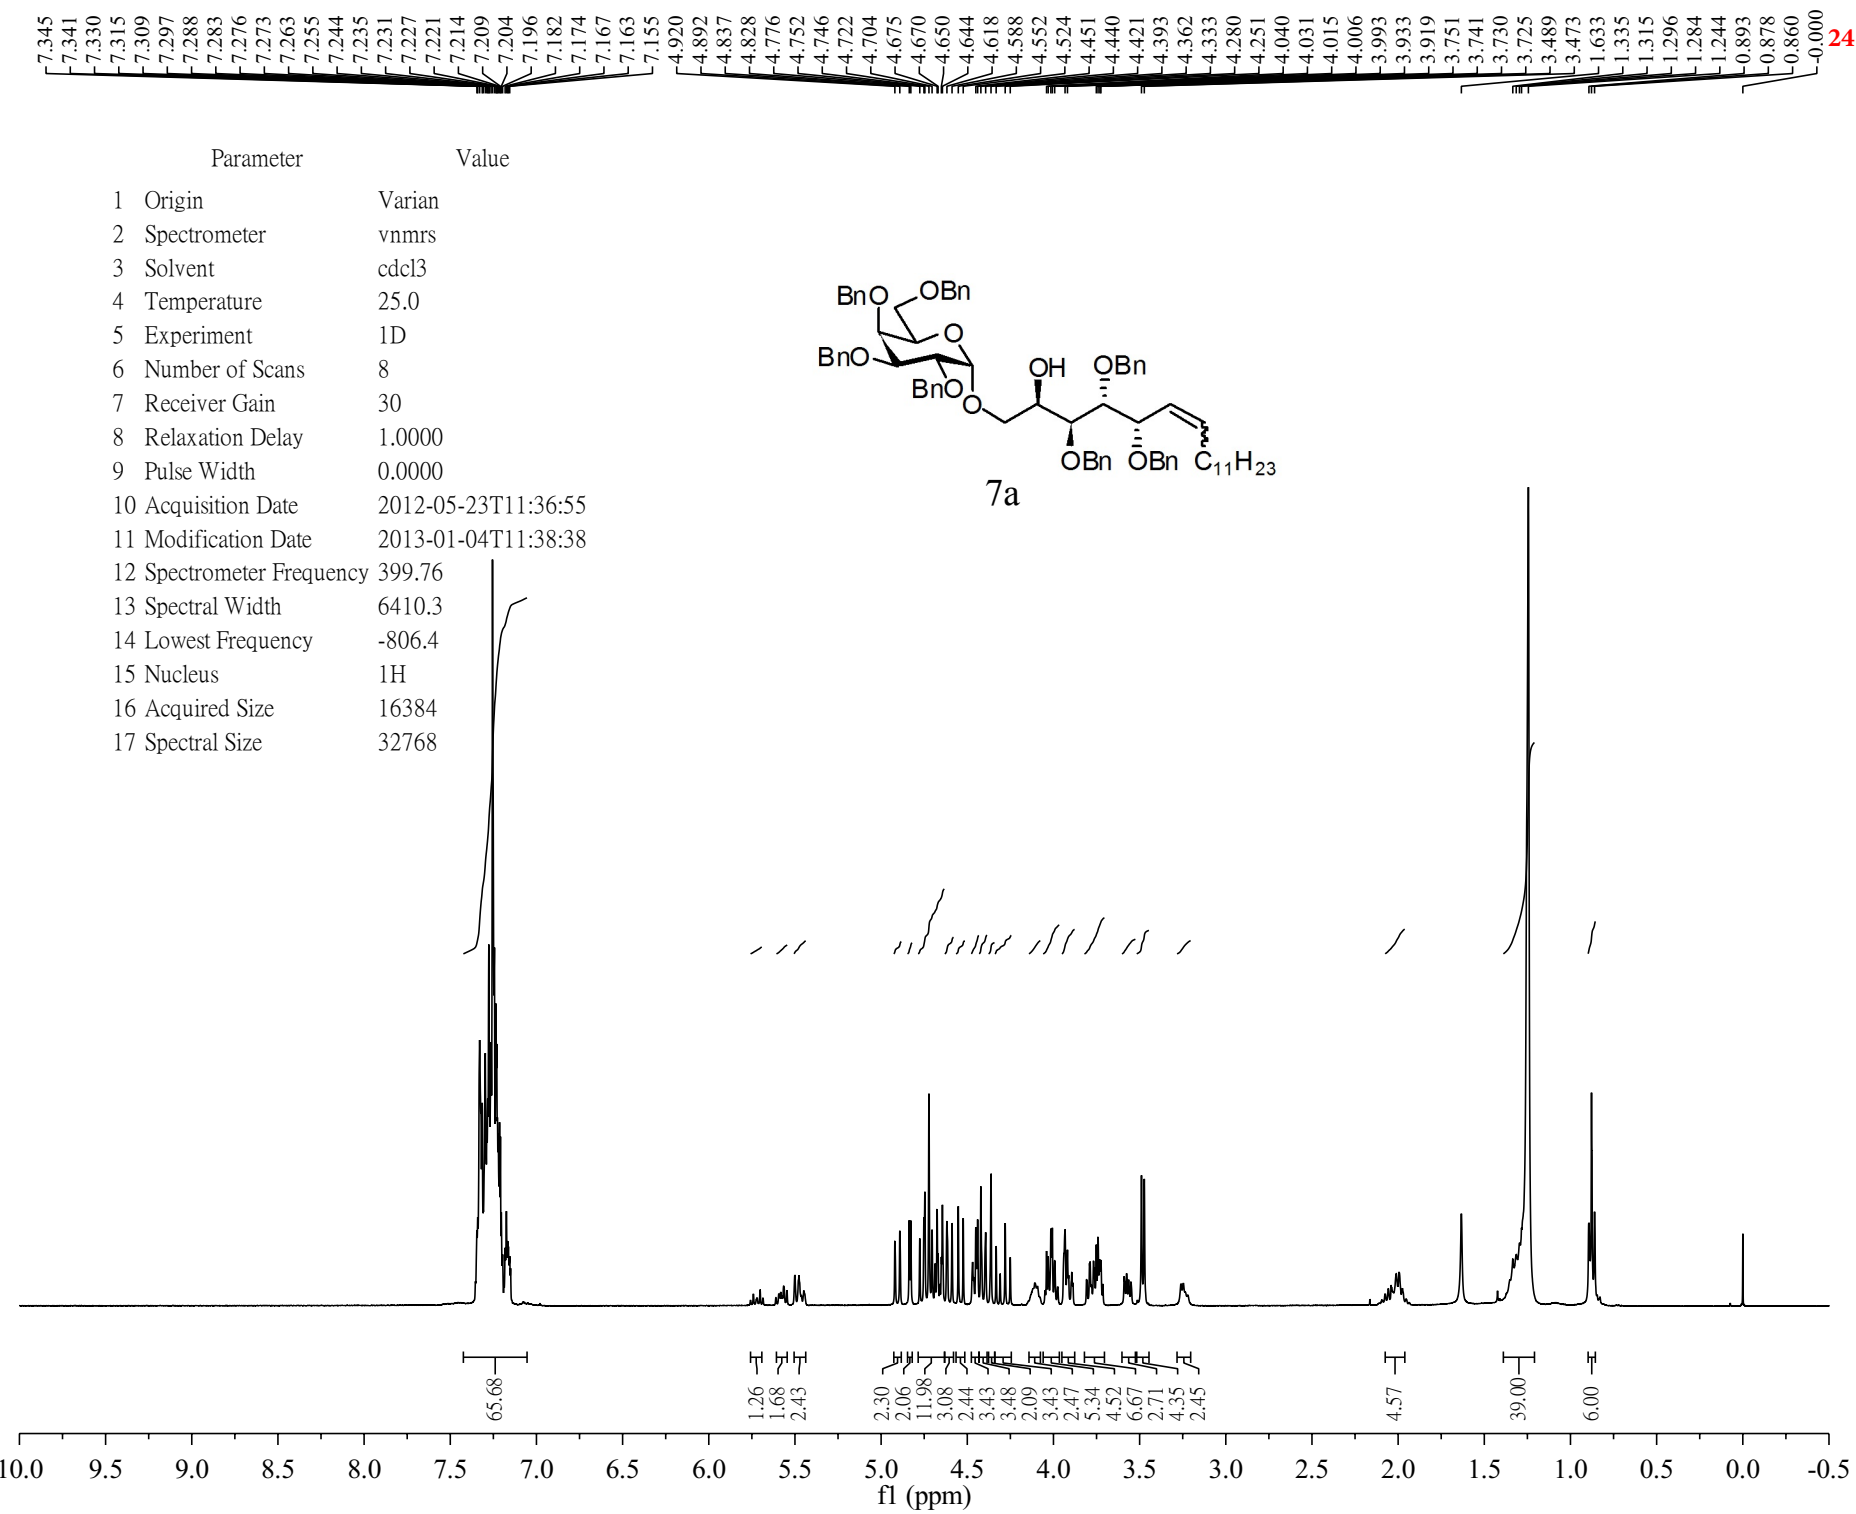



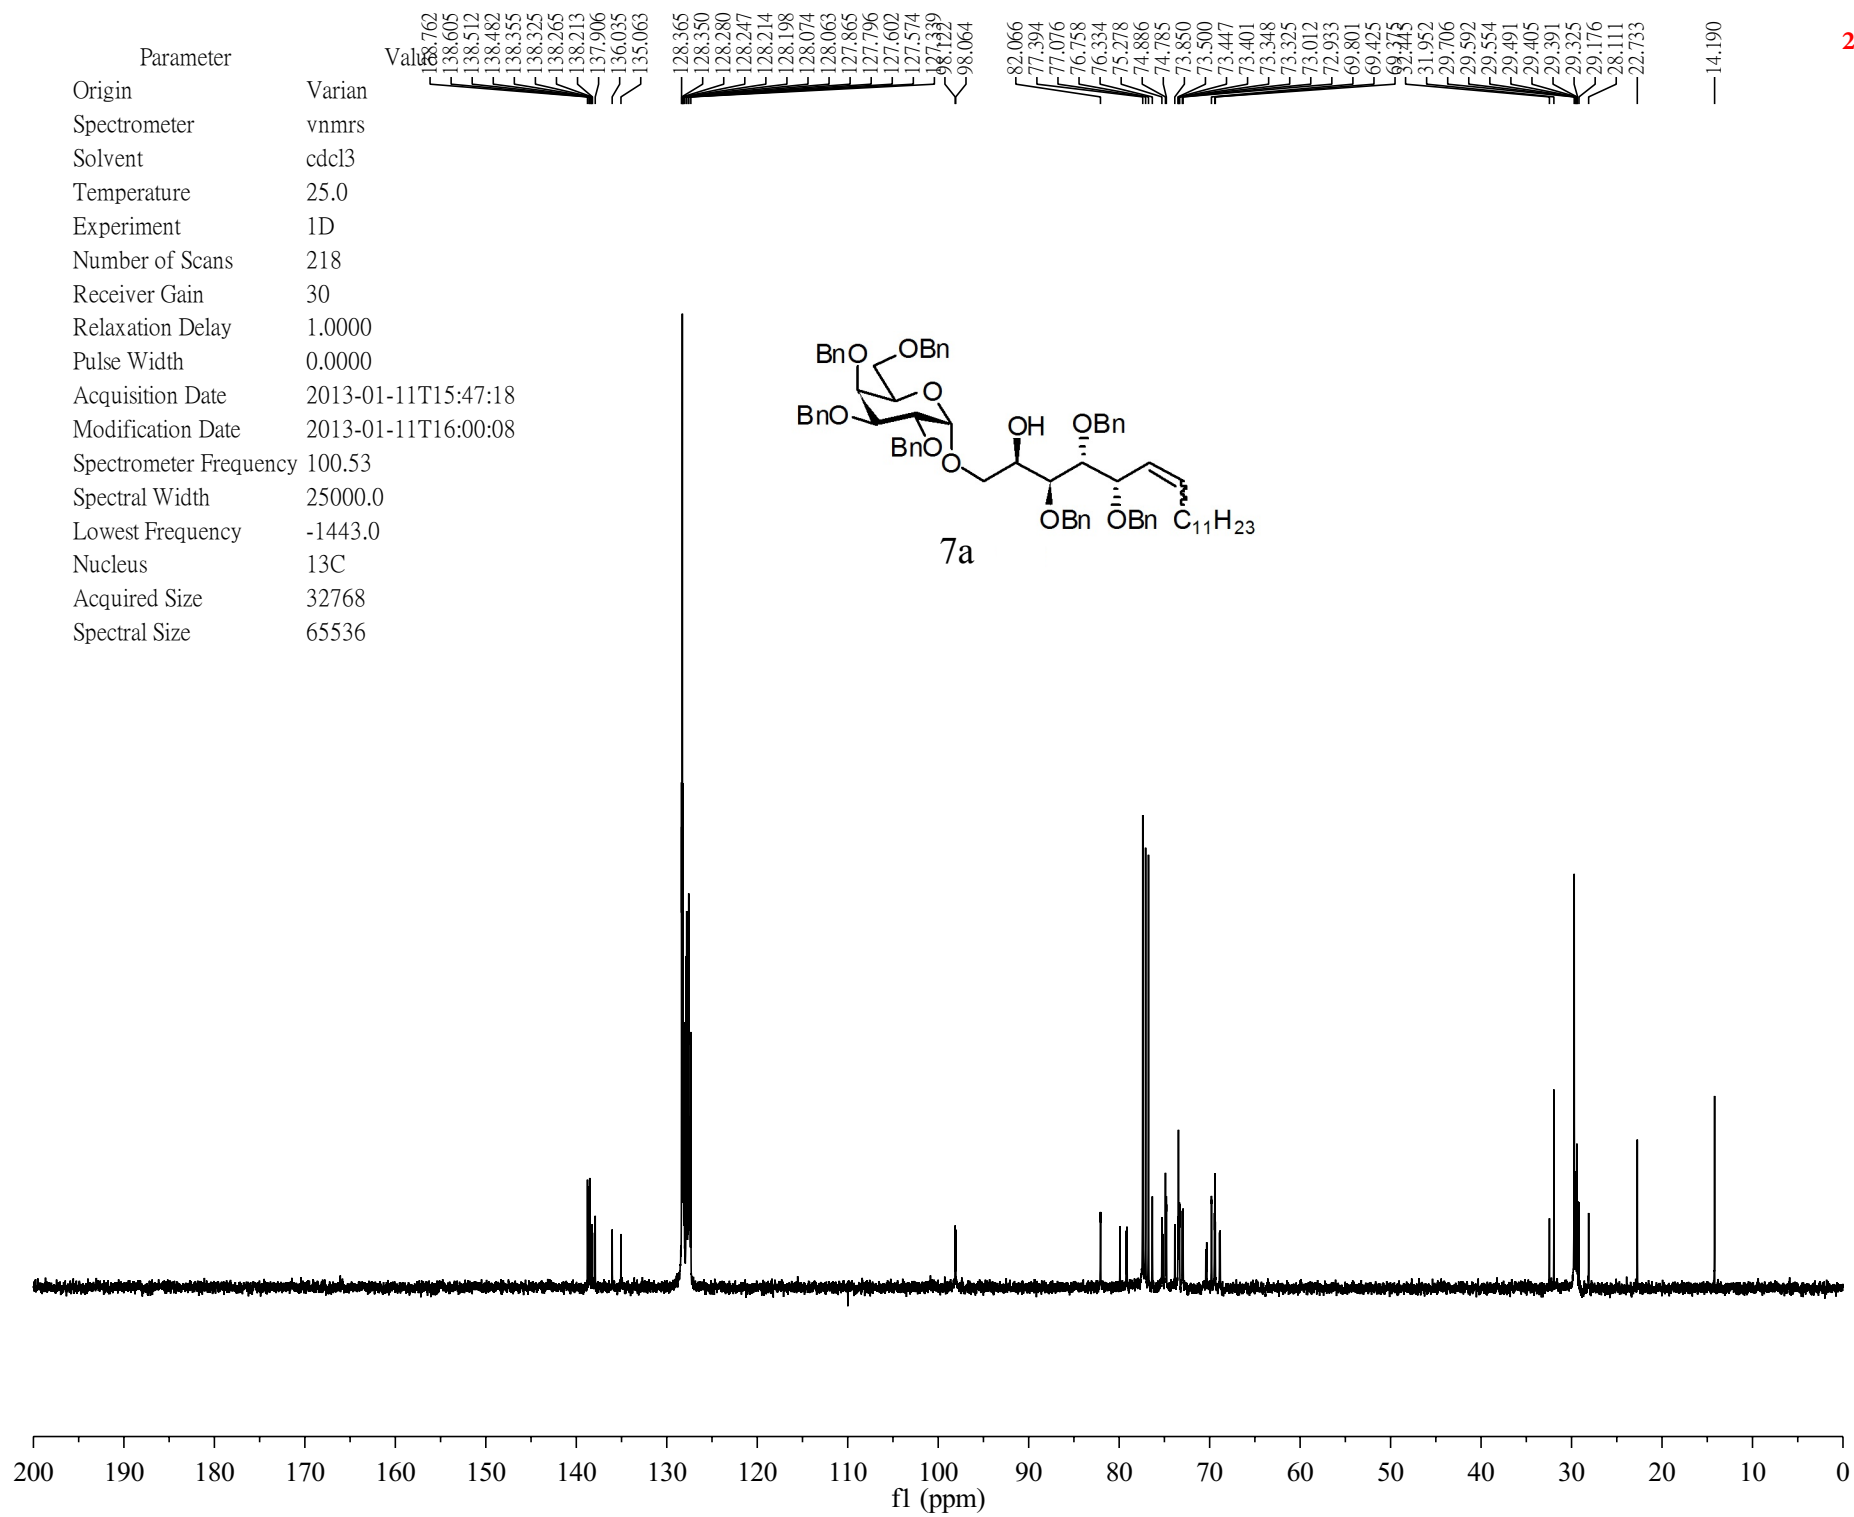

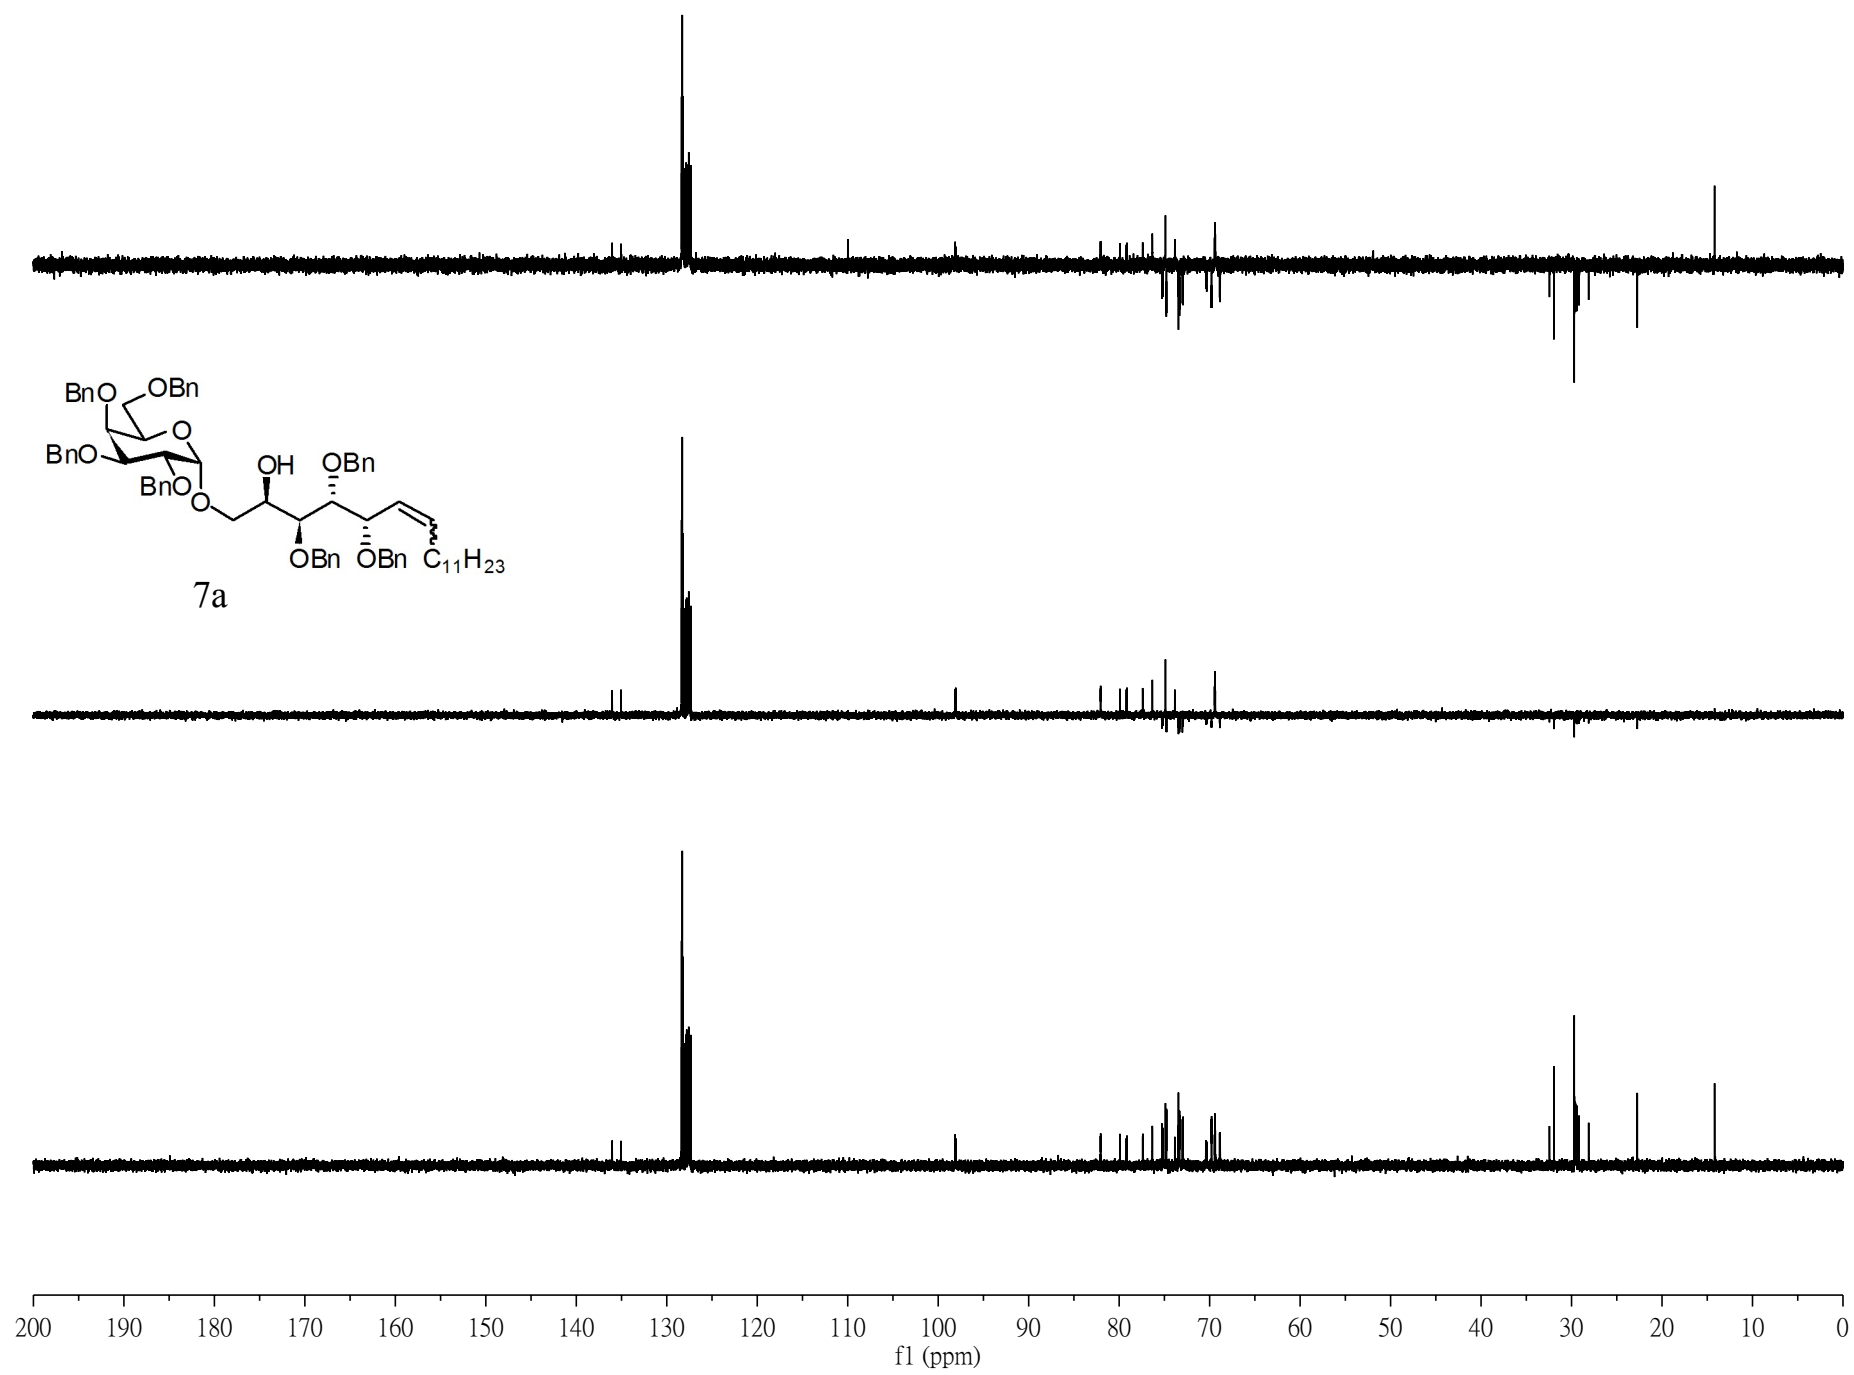

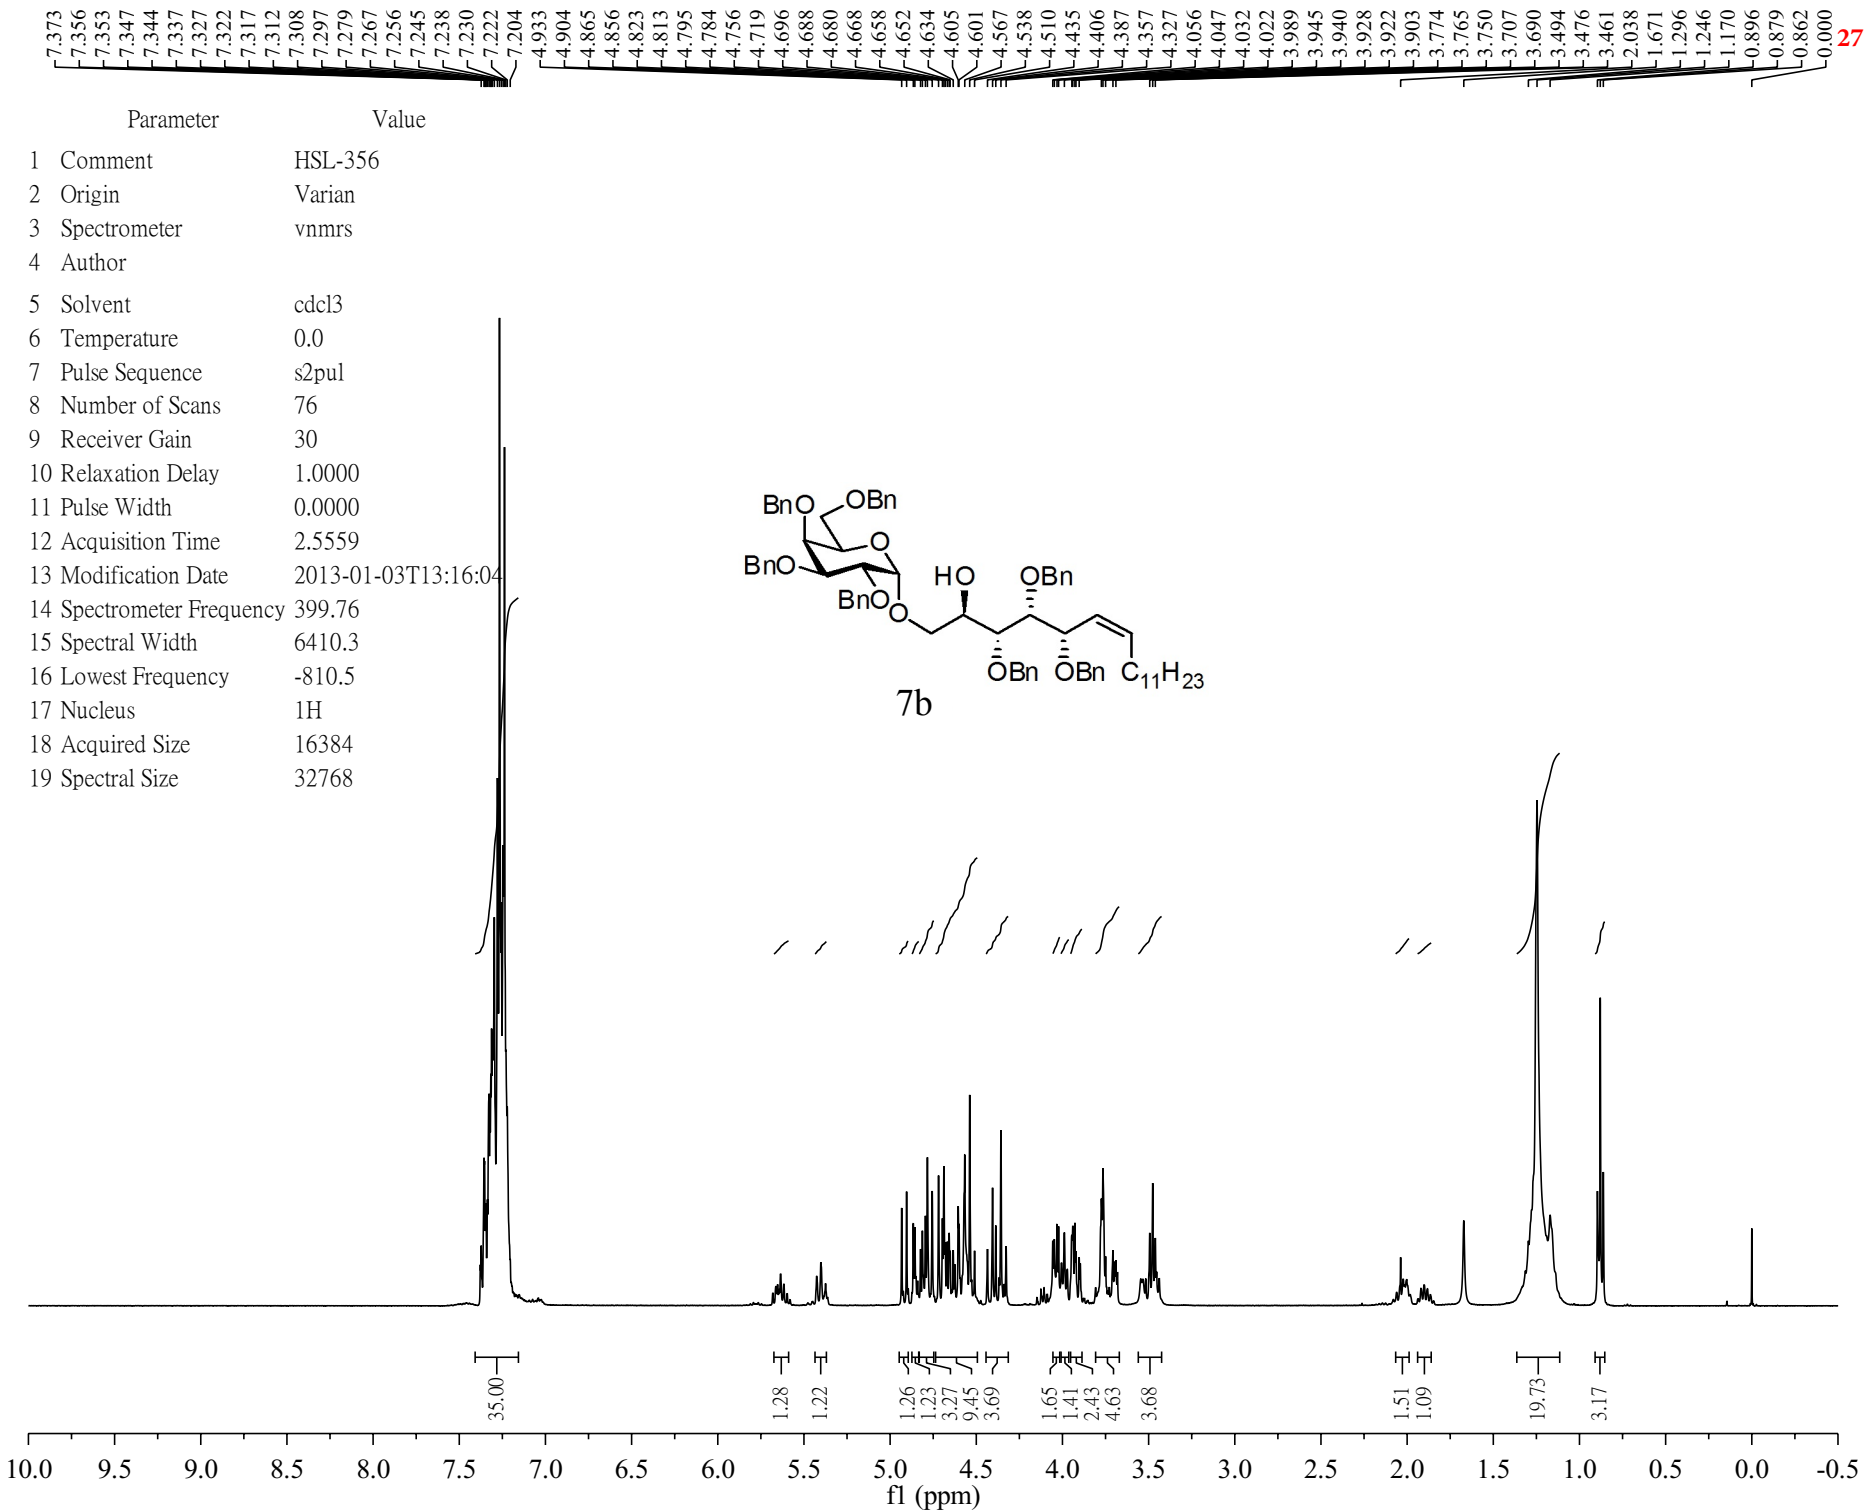

| Parameter                 | Value               |
|---------------------------|---------------------|
| 1 Comment                 | HSL-356             |
| 2 Origin                  | Varian              |
| 3 Spectrometer            | nmrs                |
| 4 Author                  |                     |
| 5 Solvent                 | cdcl3               |
| 6 Temperature             | 0.0                 |
| 7 Pulse Sequence          | s2pul               |
| 8 Number of Scans         | 128                 |
| 9 Receiver Gain           | 30                  |
| 10 Relaxation Delay       | 1.0000              |
| 11 Pulse Width            | 0.0000              |
| 12 Acquisition Time       | 1.2845              |
| 13 Modification Date      | 2013-01-03T13:16:00 |
| 14 Spectrometer Frequency | 100.53              |
| 15 Spectral Width         | 25510.2             |
| 16 Lowest Frequency       | -1701.8             |
| 17 Nucleus                | 13C                 |
| 18 Acquired Size          | 32768               |
| 19 Spectral Size          | 65536               |

138.655  
138.567  
138.253  
137.838  
135.752  
128.325  
128.200  
128.168  
128.145  
127.998  
127.970  
127.777  
127.745  
127.648  
127.475  
127.429  
127.367  
98.634  
81.791  
79.000  
78.832  
77.307  
76.990  
76.672  
76.389  
75.453  
74.809  
74.725  
73.511  
73.391  
72.956  
72.840  
70.739  
70.192  
70.096  
69.545  
68.741

31.886  
29.664  
29.623  
29.483  
29.417  
29.328  
28.145  
22.663

14.107

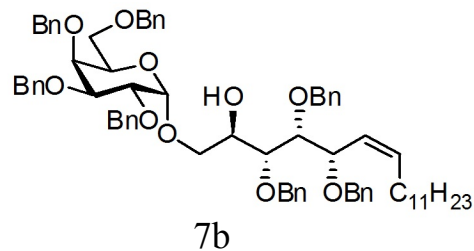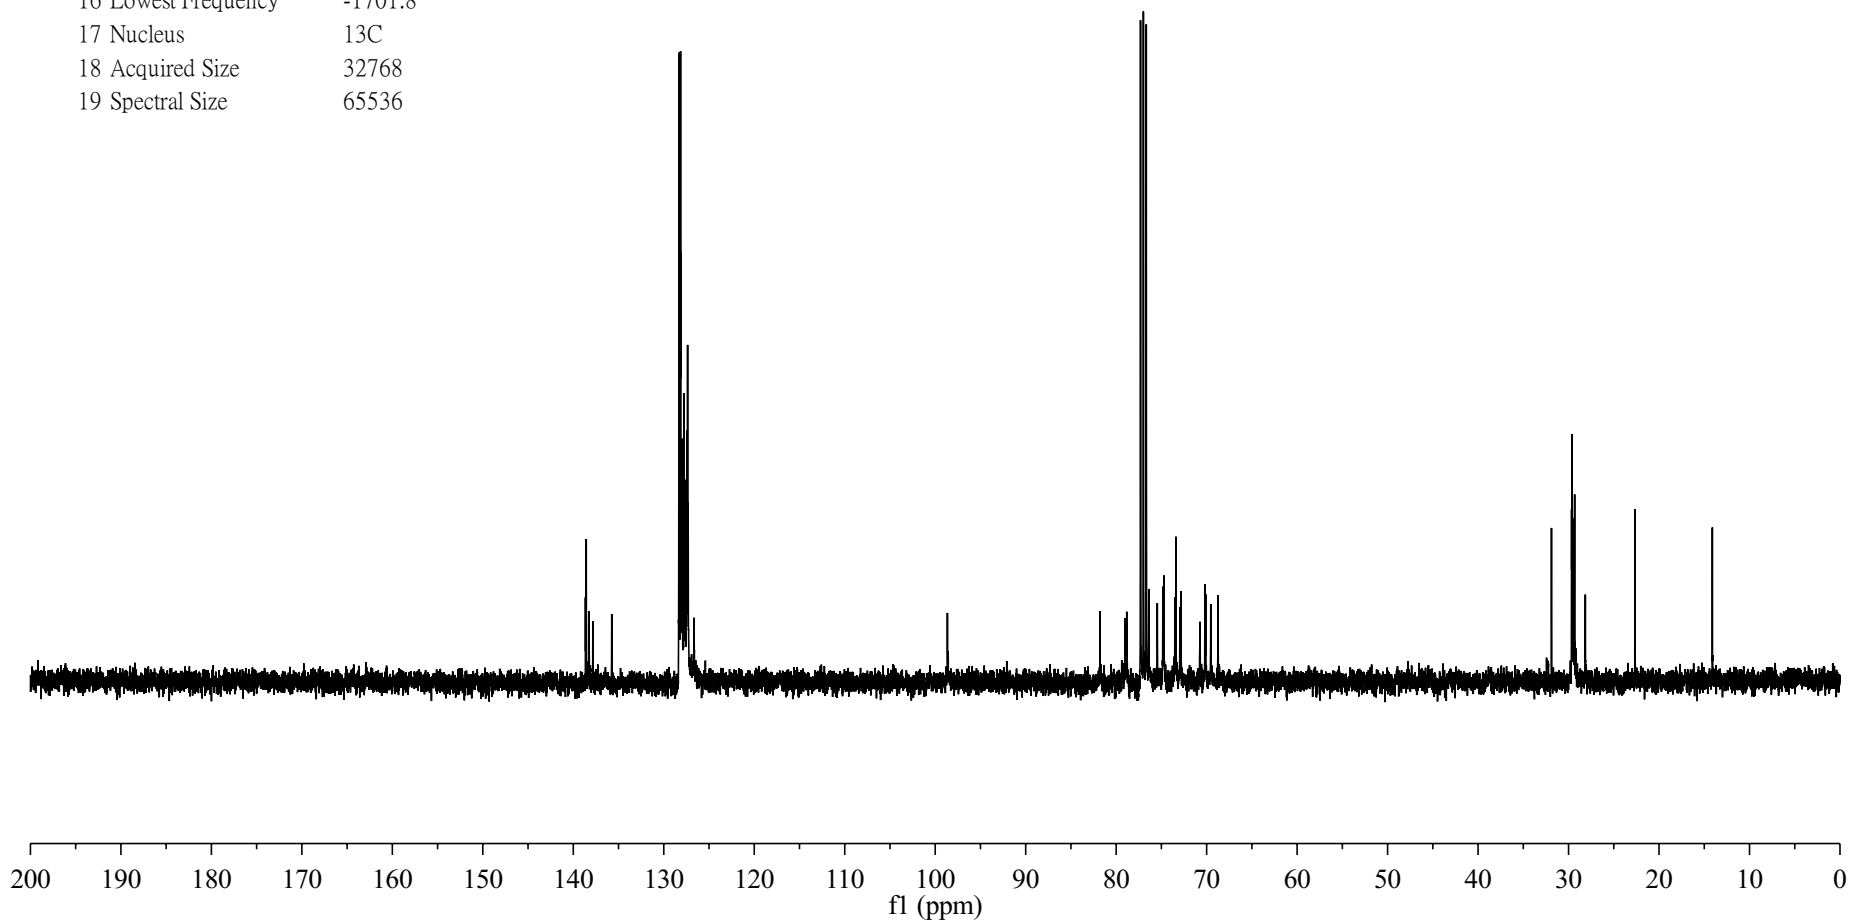

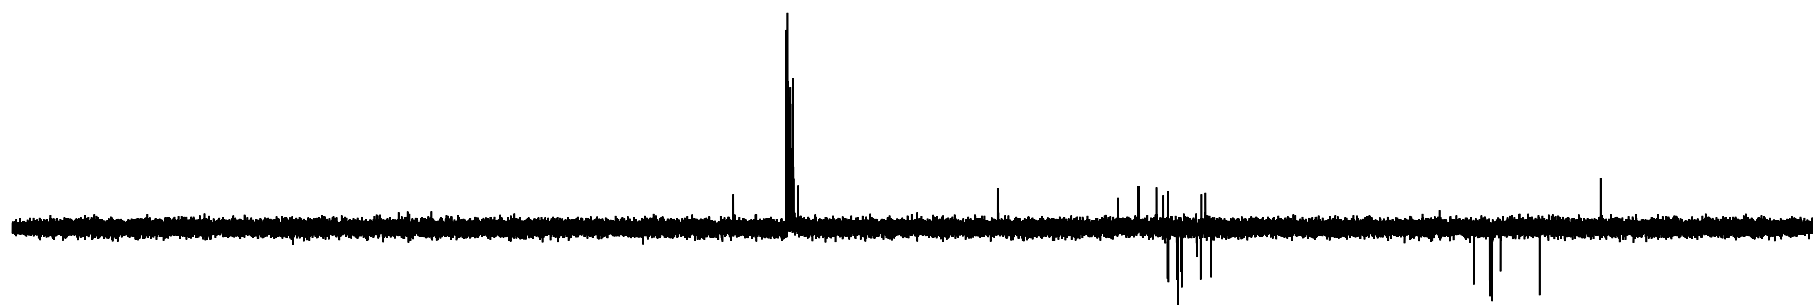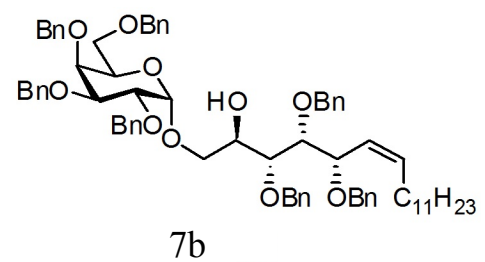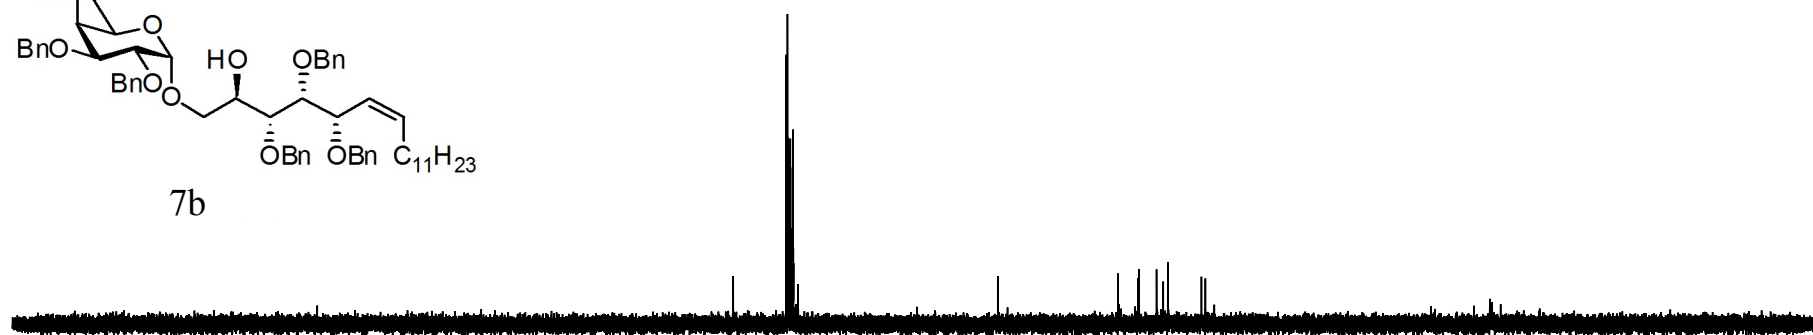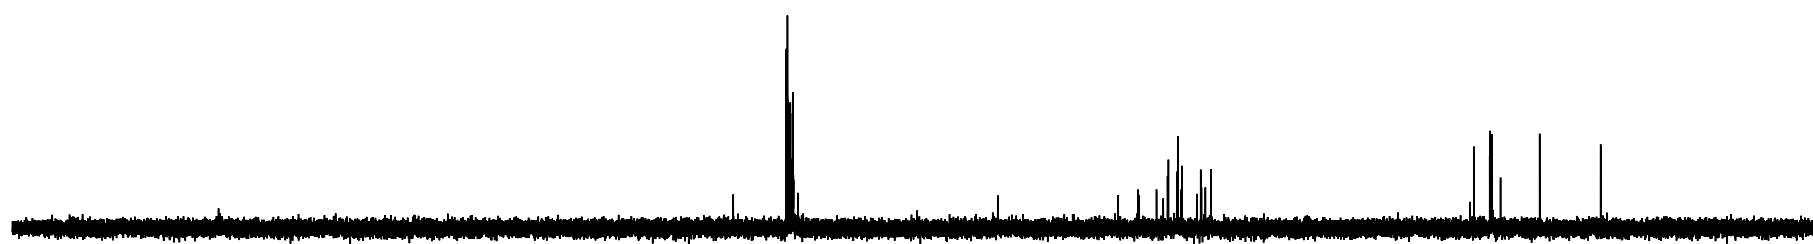

230 220 210 200 190 180 170 160 150 140 130 120 110 100 90 80 70 60 50 40 30 20 10 0 -10  
f1 (ppm)

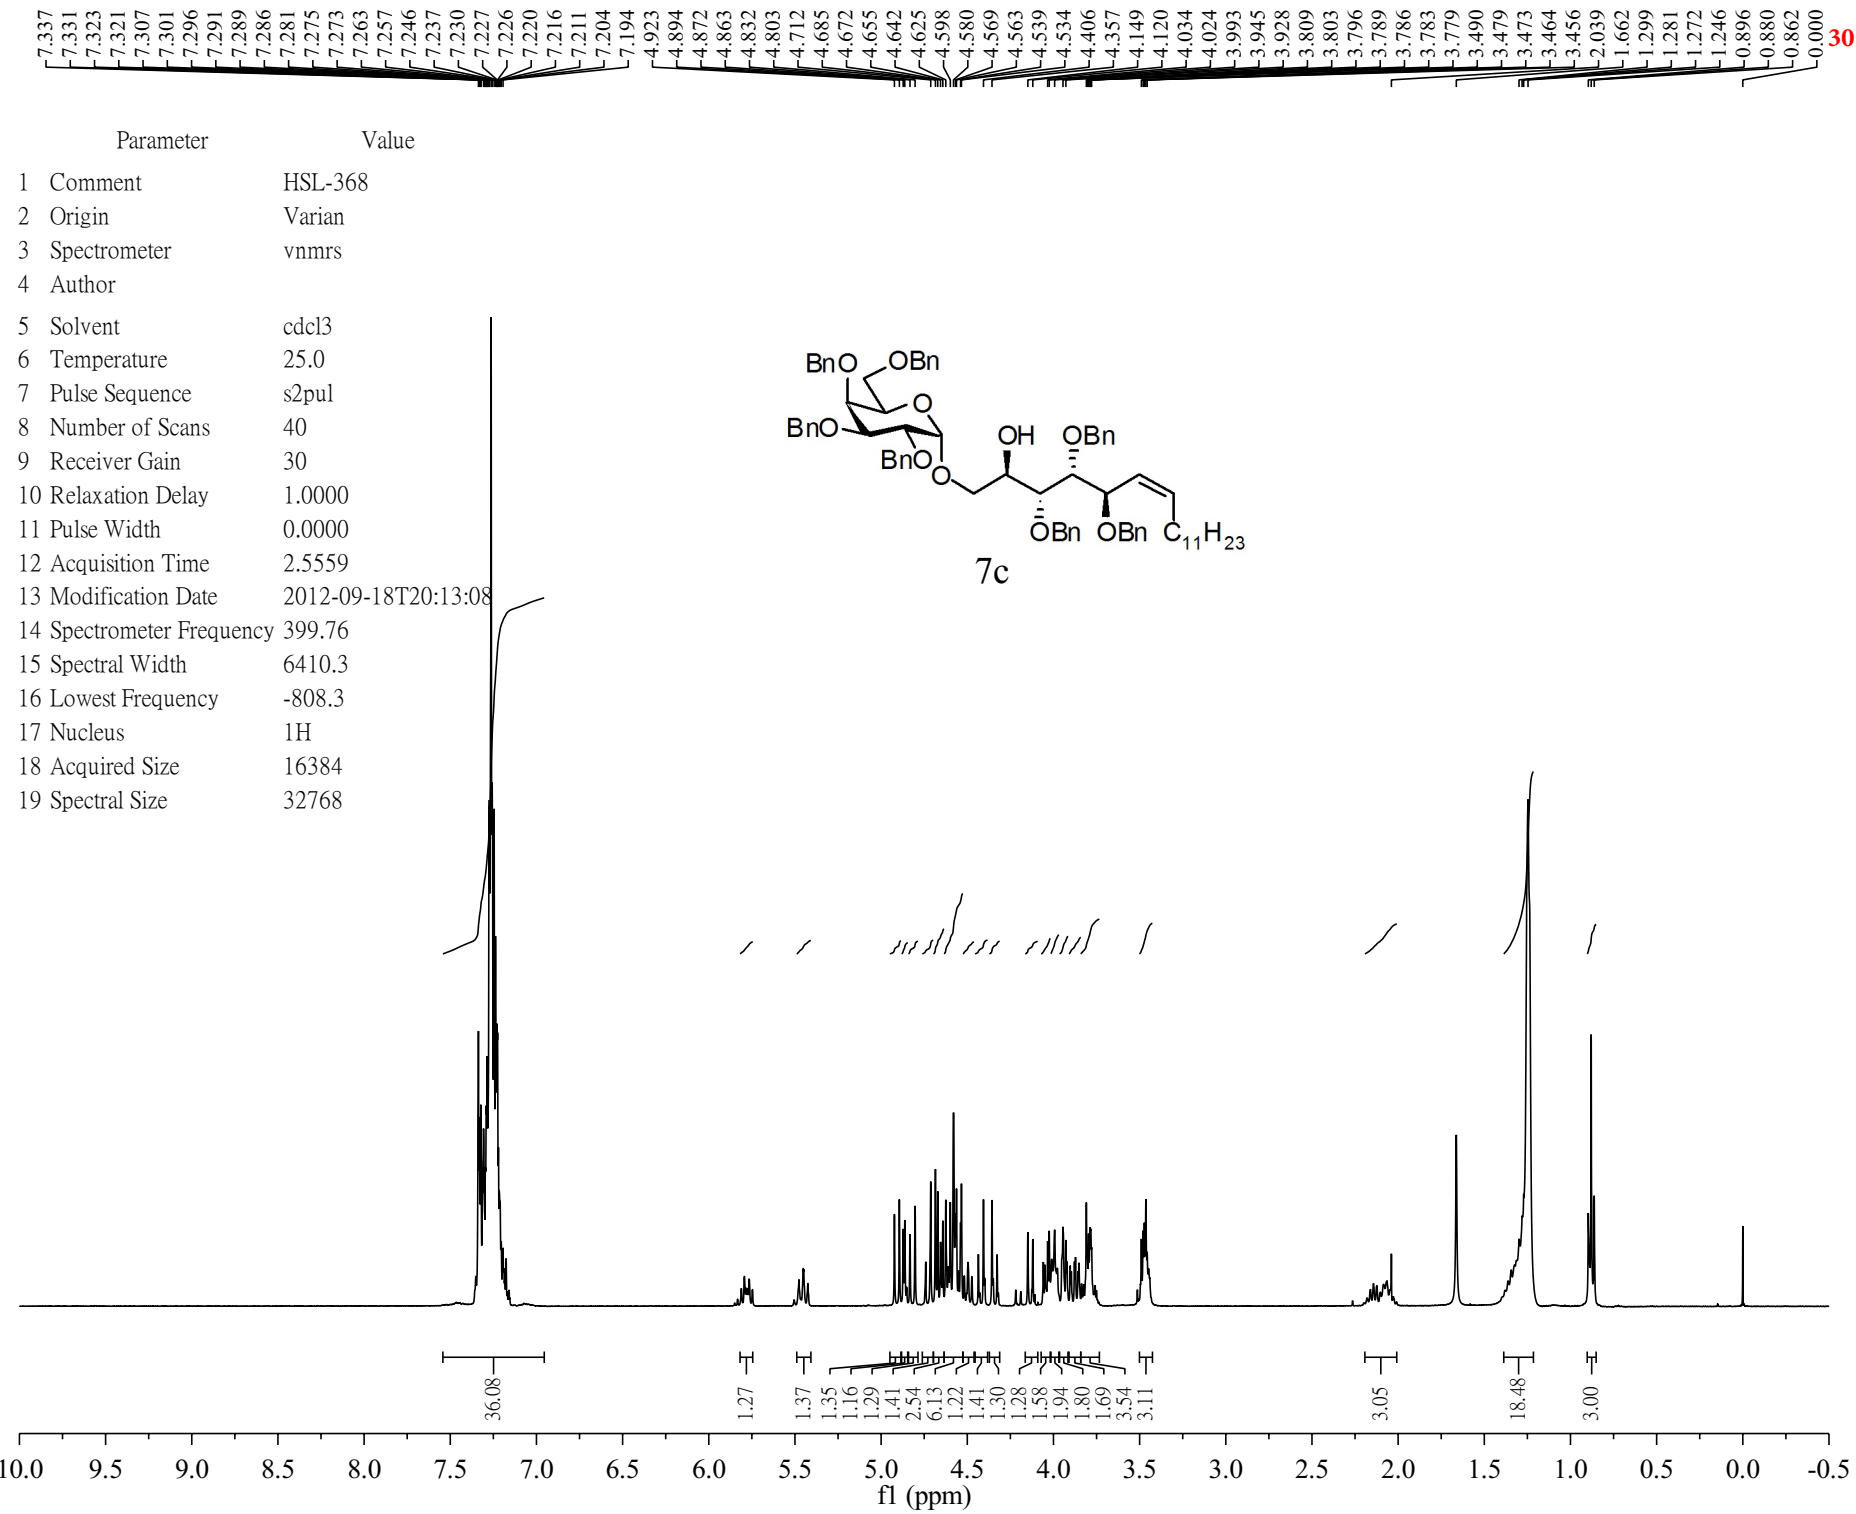

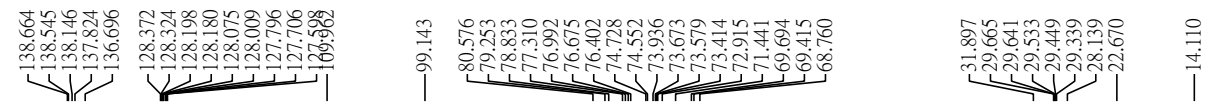

| Parameter                 | Value               |
|---------------------------|---------------------|
| 1 Comment                 | HSL-368             |
| 2 Origin                  | Varian              |
| 3 Spectrometer            | vnmrs               |
| 4 Author                  |                     |
| 5 Solvent                 | cdcl3               |
| 6 Temperature             | 25.0                |
| 7 Pulse Sequence          | s2pul               |
| 8 Number of Scans         | 168                 |
| 9 Receiver Gain           | 30                  |
| 10 Relaxation Delay       | 1.0000              |
| 11 Pulse Width            | 0.0000              |
| 12 Acquisition Time       | 1.2845              |
| 13 Modification Date      | 2012-09-18T20:13:04 |
| 14 Spectrometer Frequency | 100.53              |
| 15 Spectral Width         | 25510.2             |
| 16 Lowest Frequency       | -1700.6             |
| 17 Nucleus                | 13C                 |
| 18 Acquired Size          | 32768               |
| 19 Spectral Size          | 65536               |

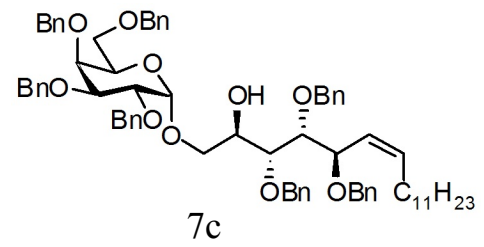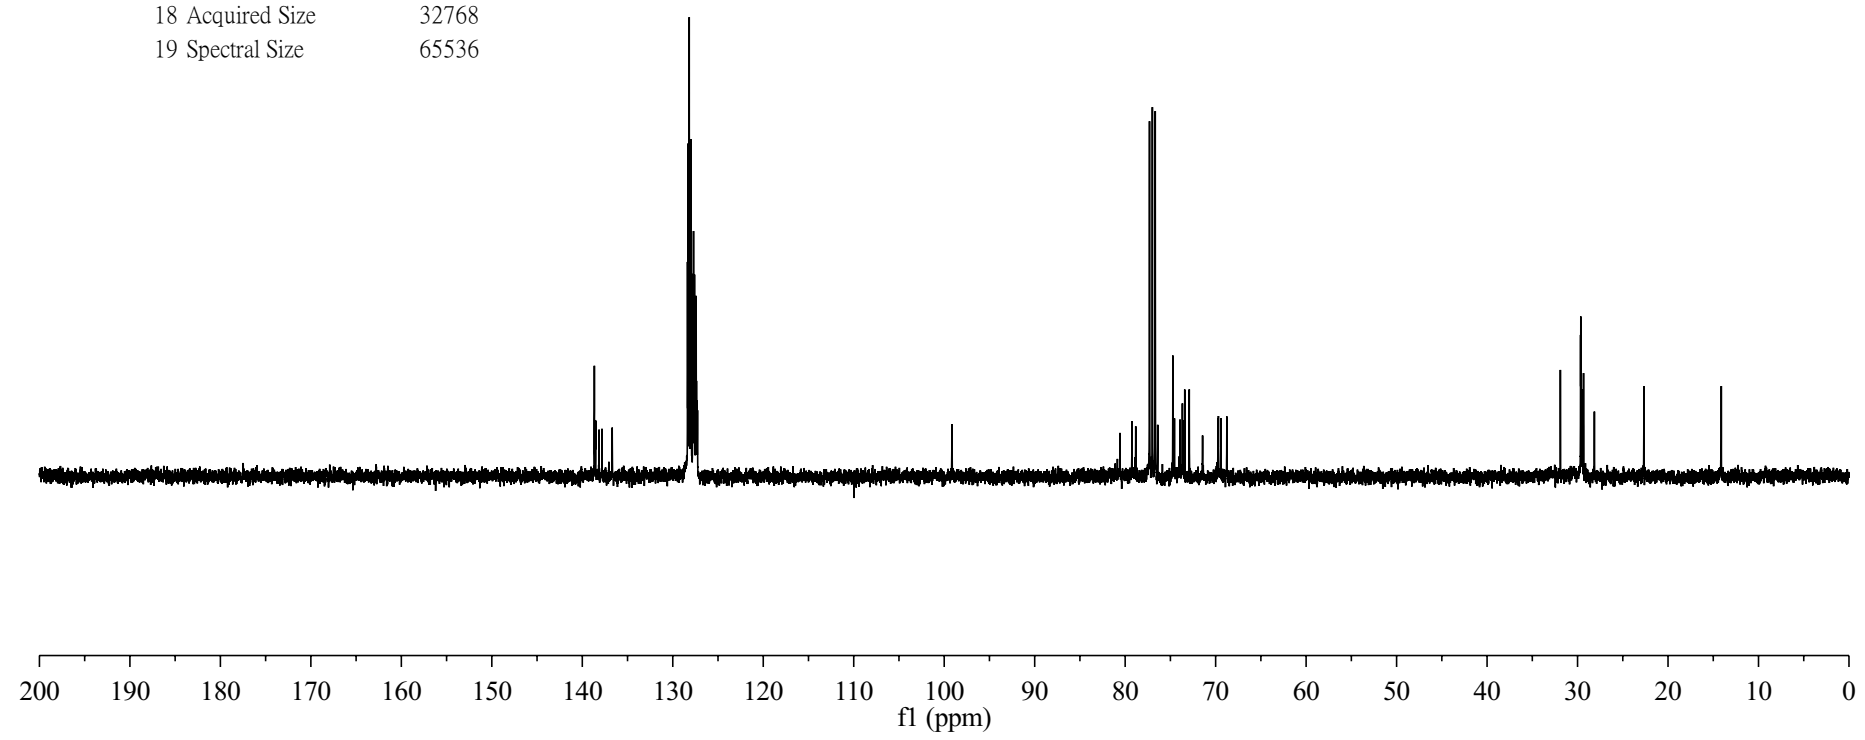

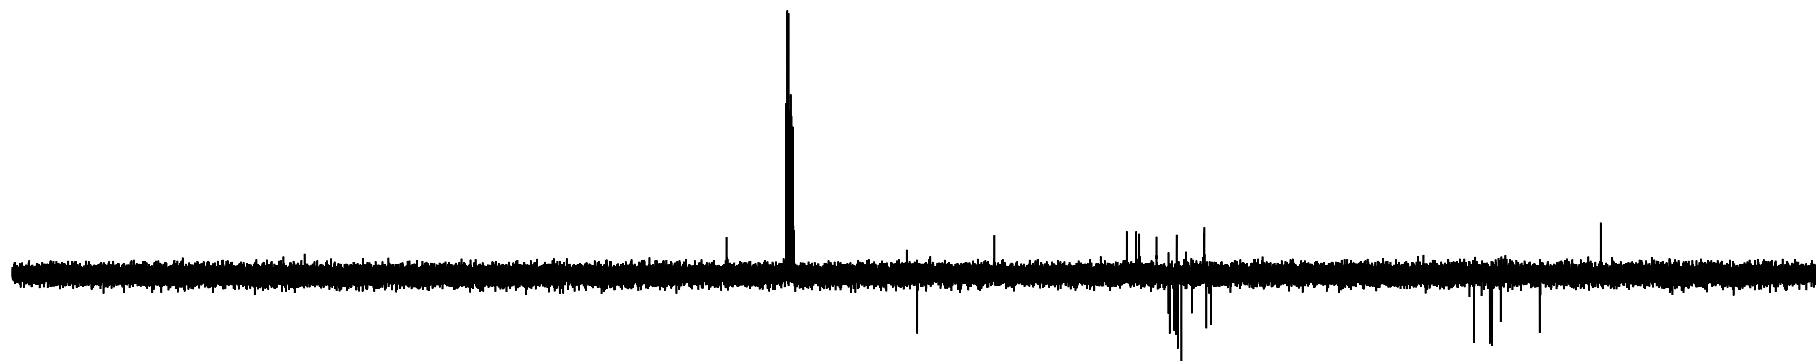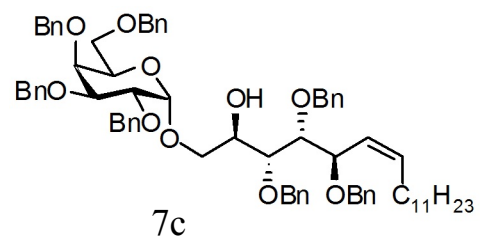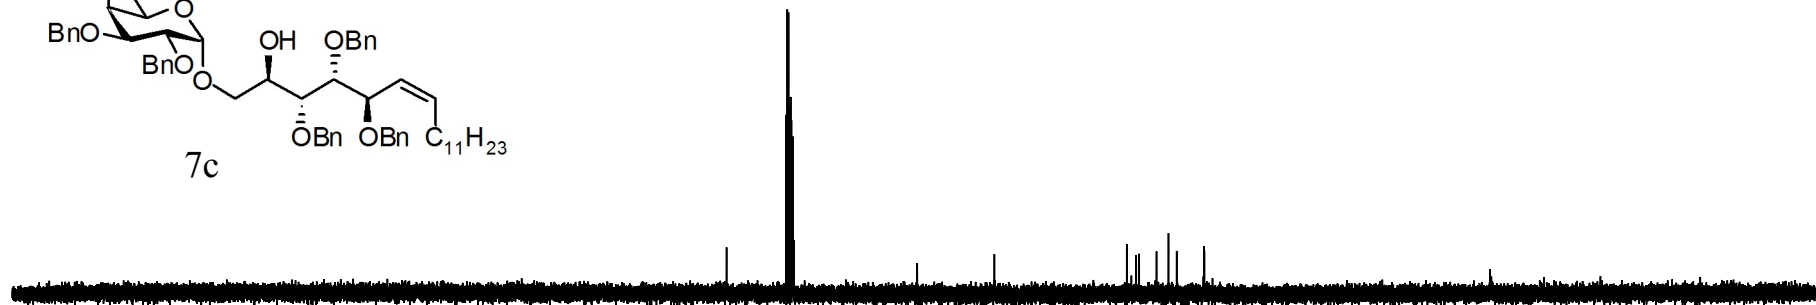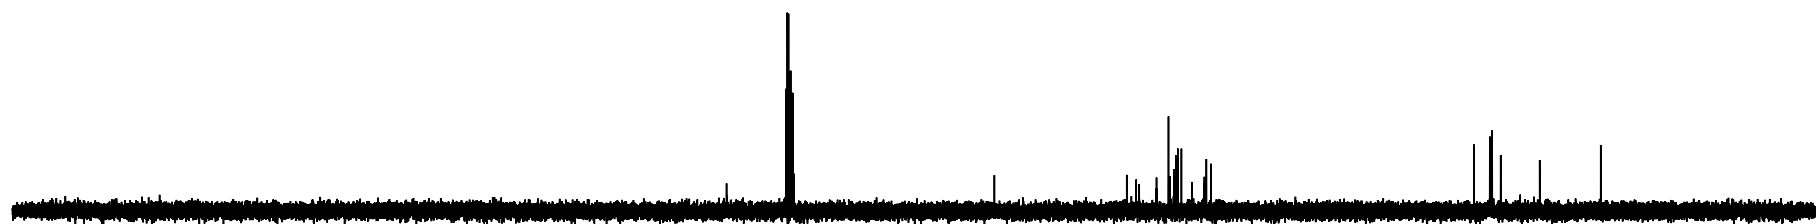

230 220 210 200 190 180 170 160 150 140 130 120 110 100 90 80 70 60 50 40 30 20 10 0 -10  
f1 (ppm)



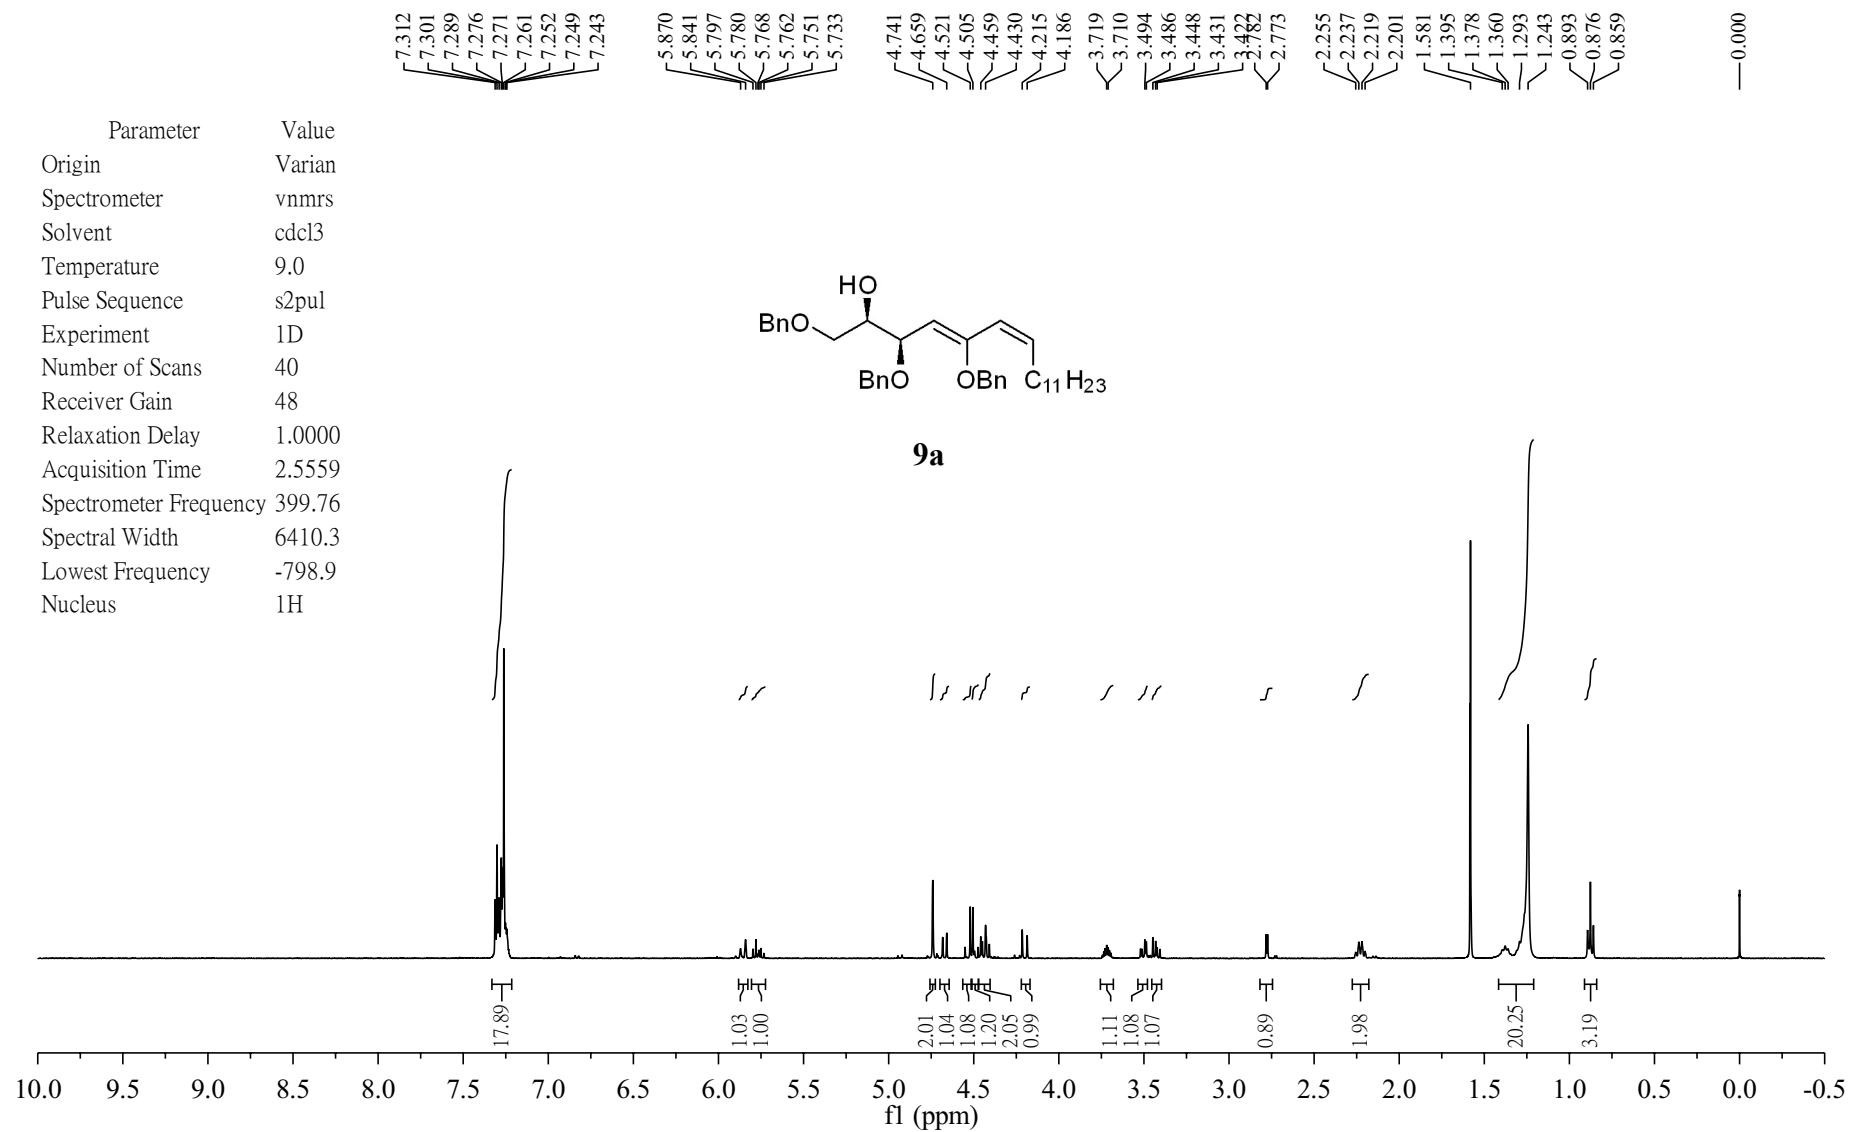

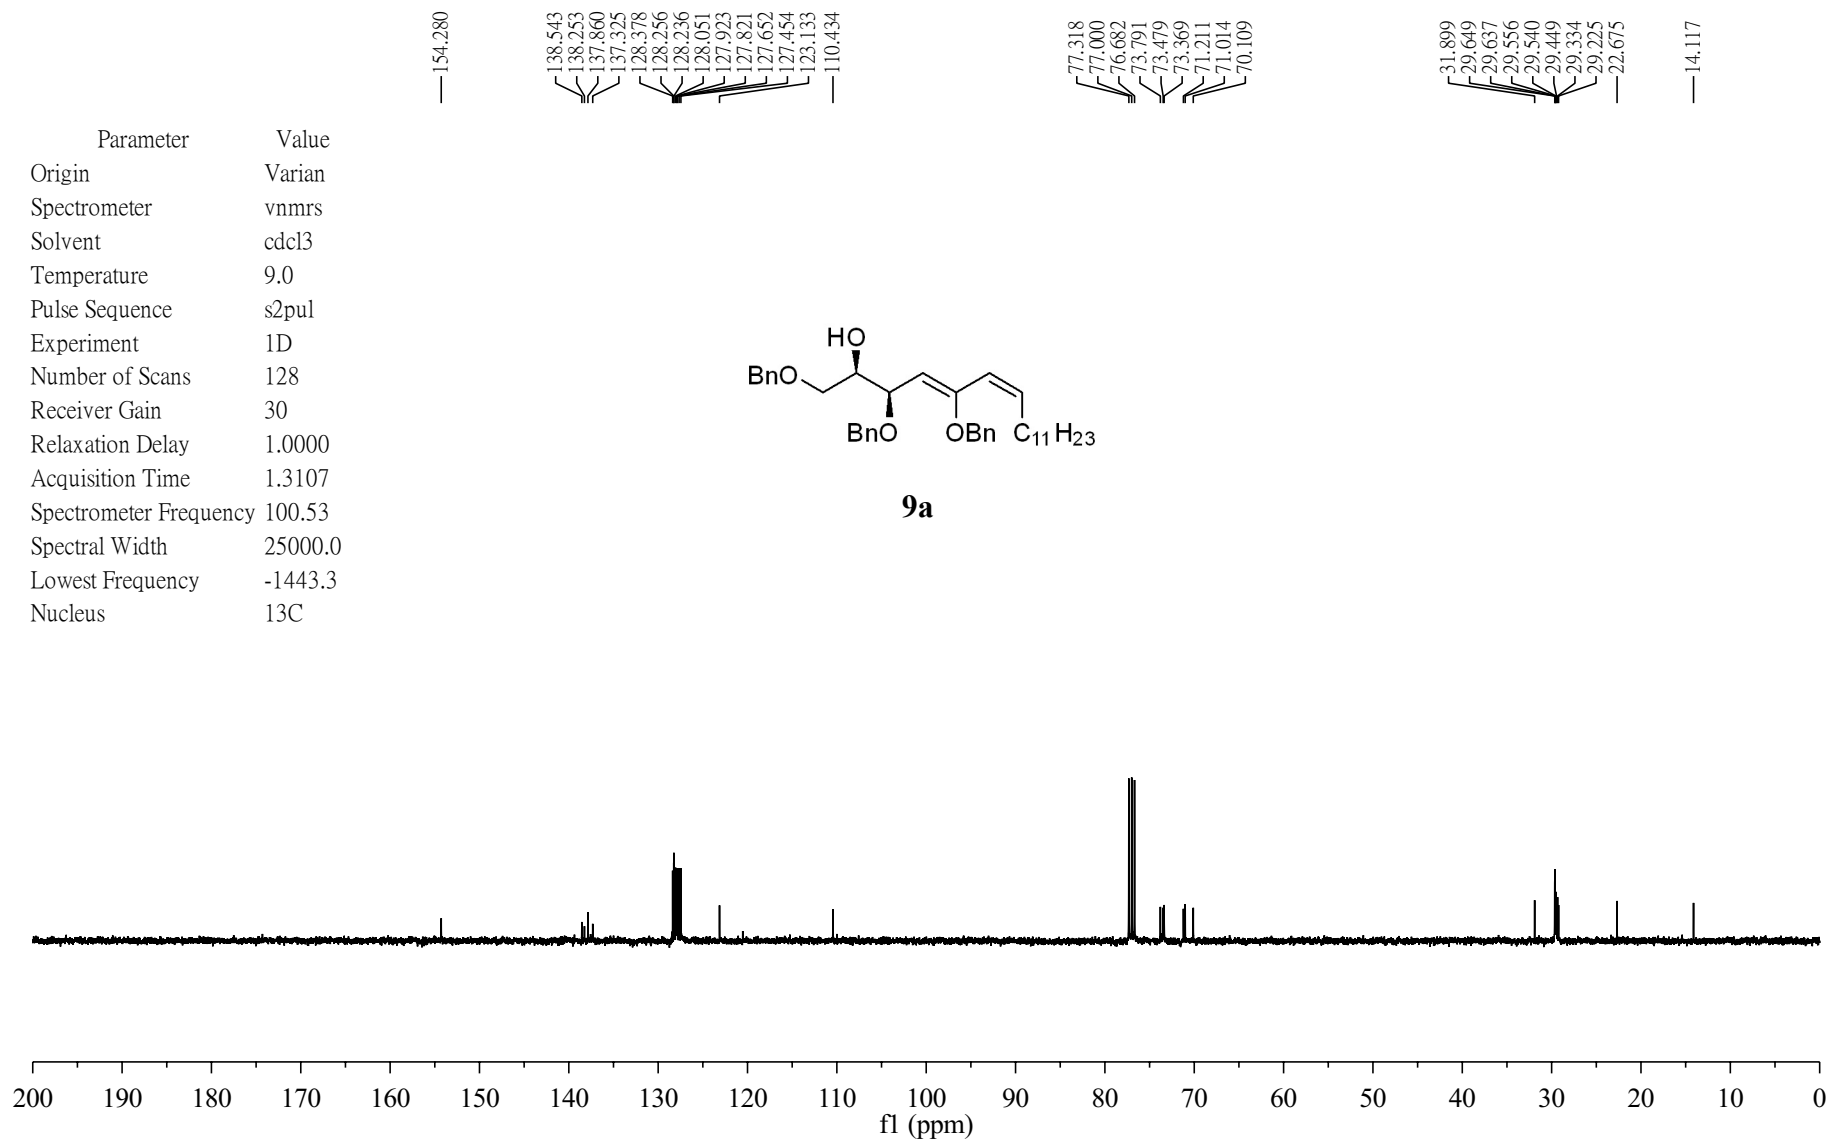

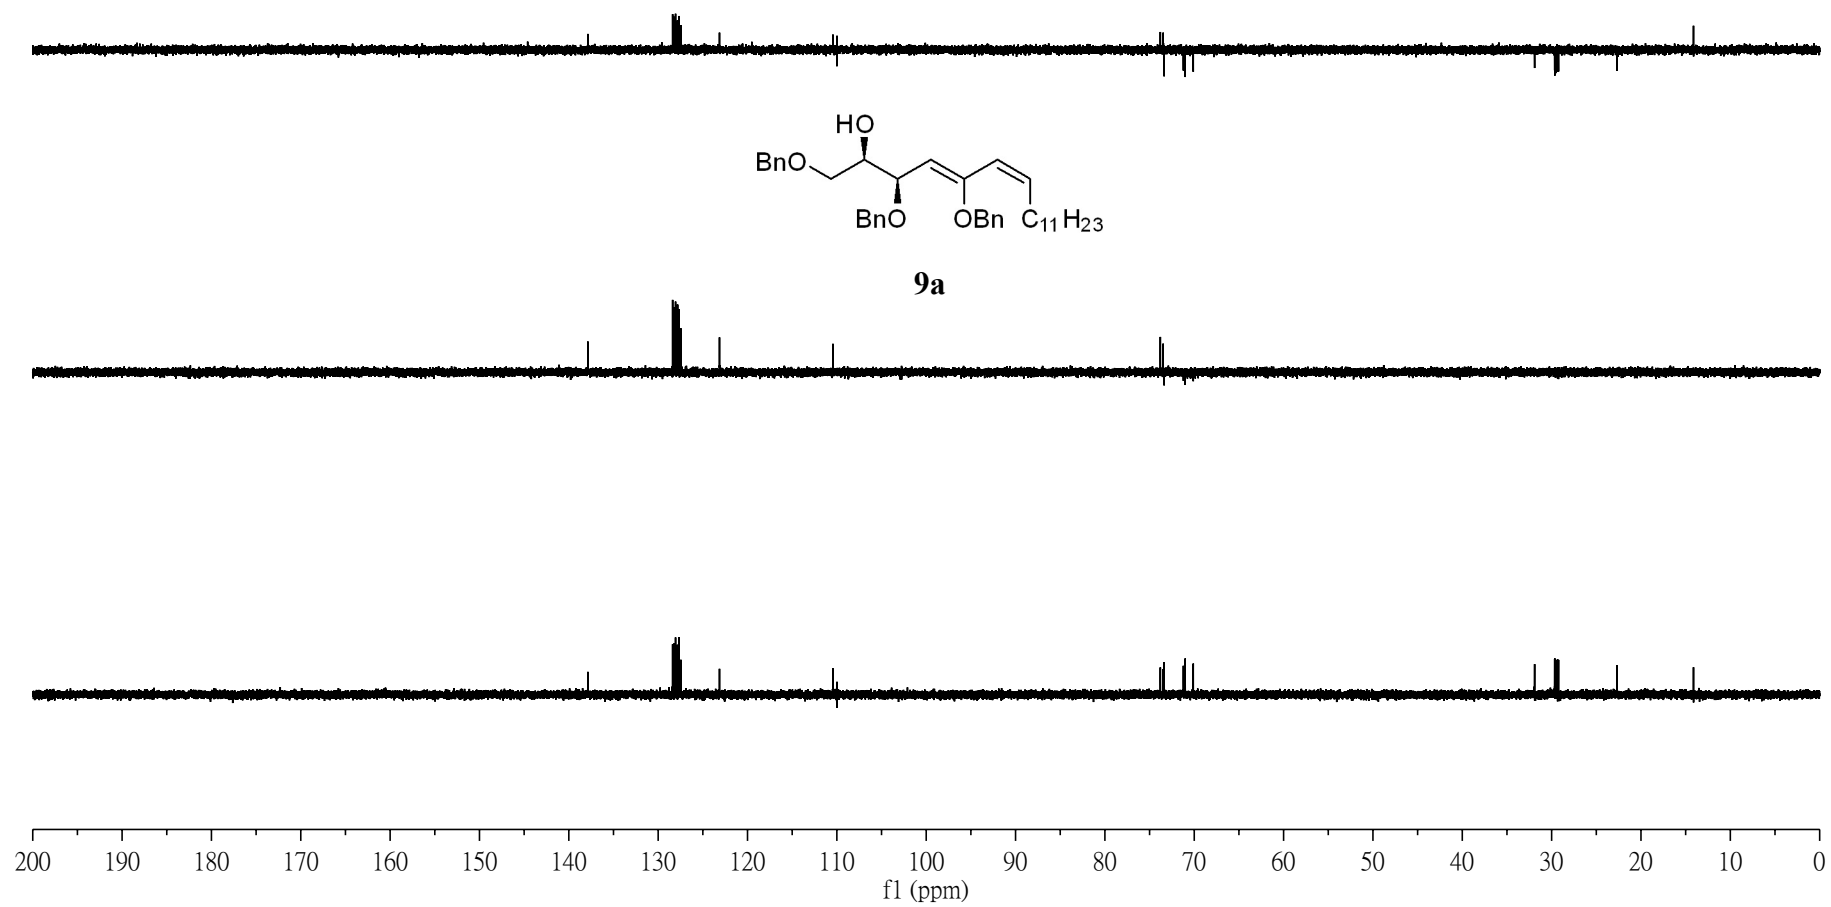

| Parameter              | Value (f2, f1)   |
|------------------------|------------------|
| Origin                 | Varian           |
| Spectrometer           | vnmrs            |
| Solvent                | cdcl3            |
| Temperature            | 9.0              |
| Pulse Sequence         | gCOSY            |
| Experiment             | 2D-COSY          |
| Number of Scans        | 1                |
| Receiver Gain          | 30               |
| Relaxation Delay       | 1.0000           |
| Acquisition Time       | 0.1501           |
| Spectrometer Frequency | (399.76, 399.76) |
| Spectral Width         | (6410.3, 6410.3) |
| Lowest Frequency       | (-798.5, -804.5) |
| Nucleus                | (1H, 1H)         |
| Acquired Size          | (962, 128)       |
| Spectral Size          | (1024, 1024)     |

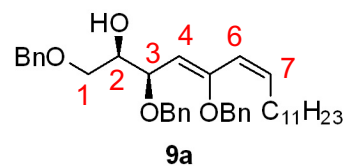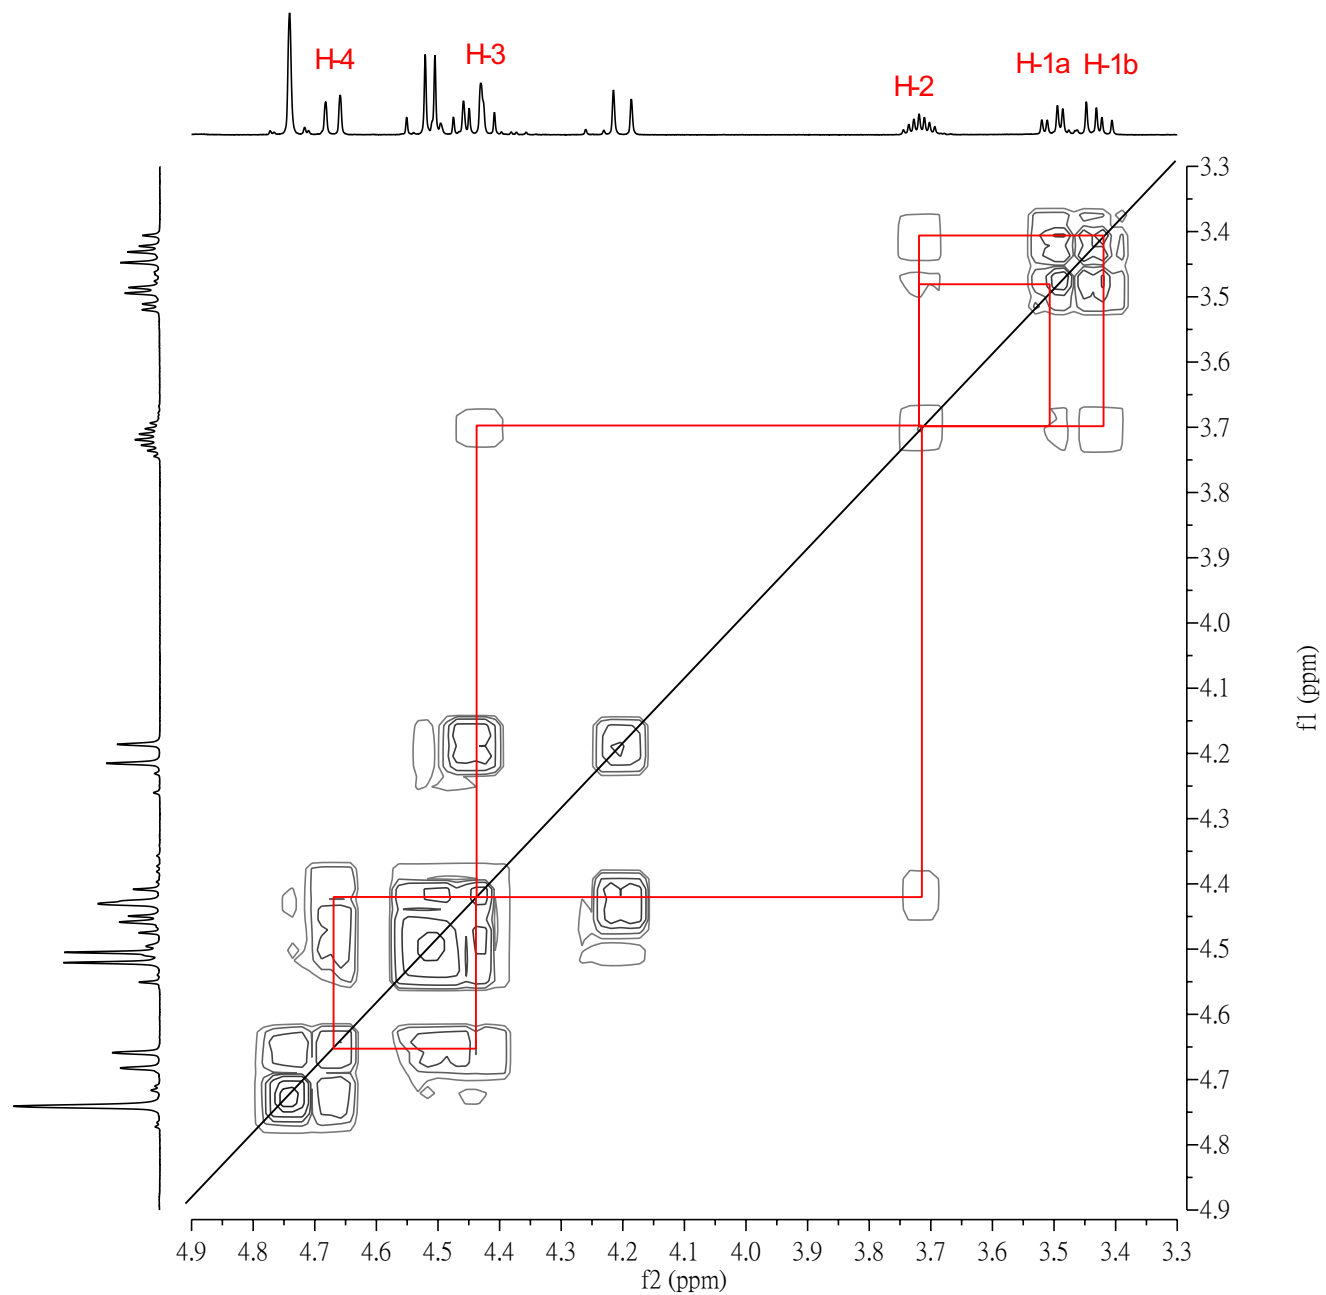

| Parameter              | Value (f2, f1)    |
|------------------------|-------------------|
| Origin                 | Varian            |
| Spectrometer           | vnmrs             |
| Solvent                | cdcl3             |
| Temperature            | 9.0               |
| Pulse Sequence         | gHSQC             |
| Experiment             | 2D-HSQC-EDITED    |
| Number of Scans        | 4                 |
| Receiver Gain          | 30                |
| Relaxation Delay       | 1.0000            |
| Acquisition Time       | 0.1501            |
| Spectrometer Frequency | (399.76, 100.53)  |
| Spectral Width         | (6410.3, 17086.7) |
| Lowest Frequency       | (-799.9, -1009.6) |
| Nucleus                | (1H, 13C)         |
| Acquired Size          | (962, 128)        |
| Spectral Size          | (1024, 1024)      |

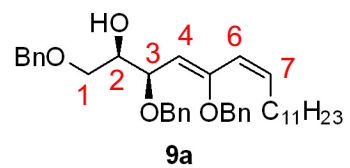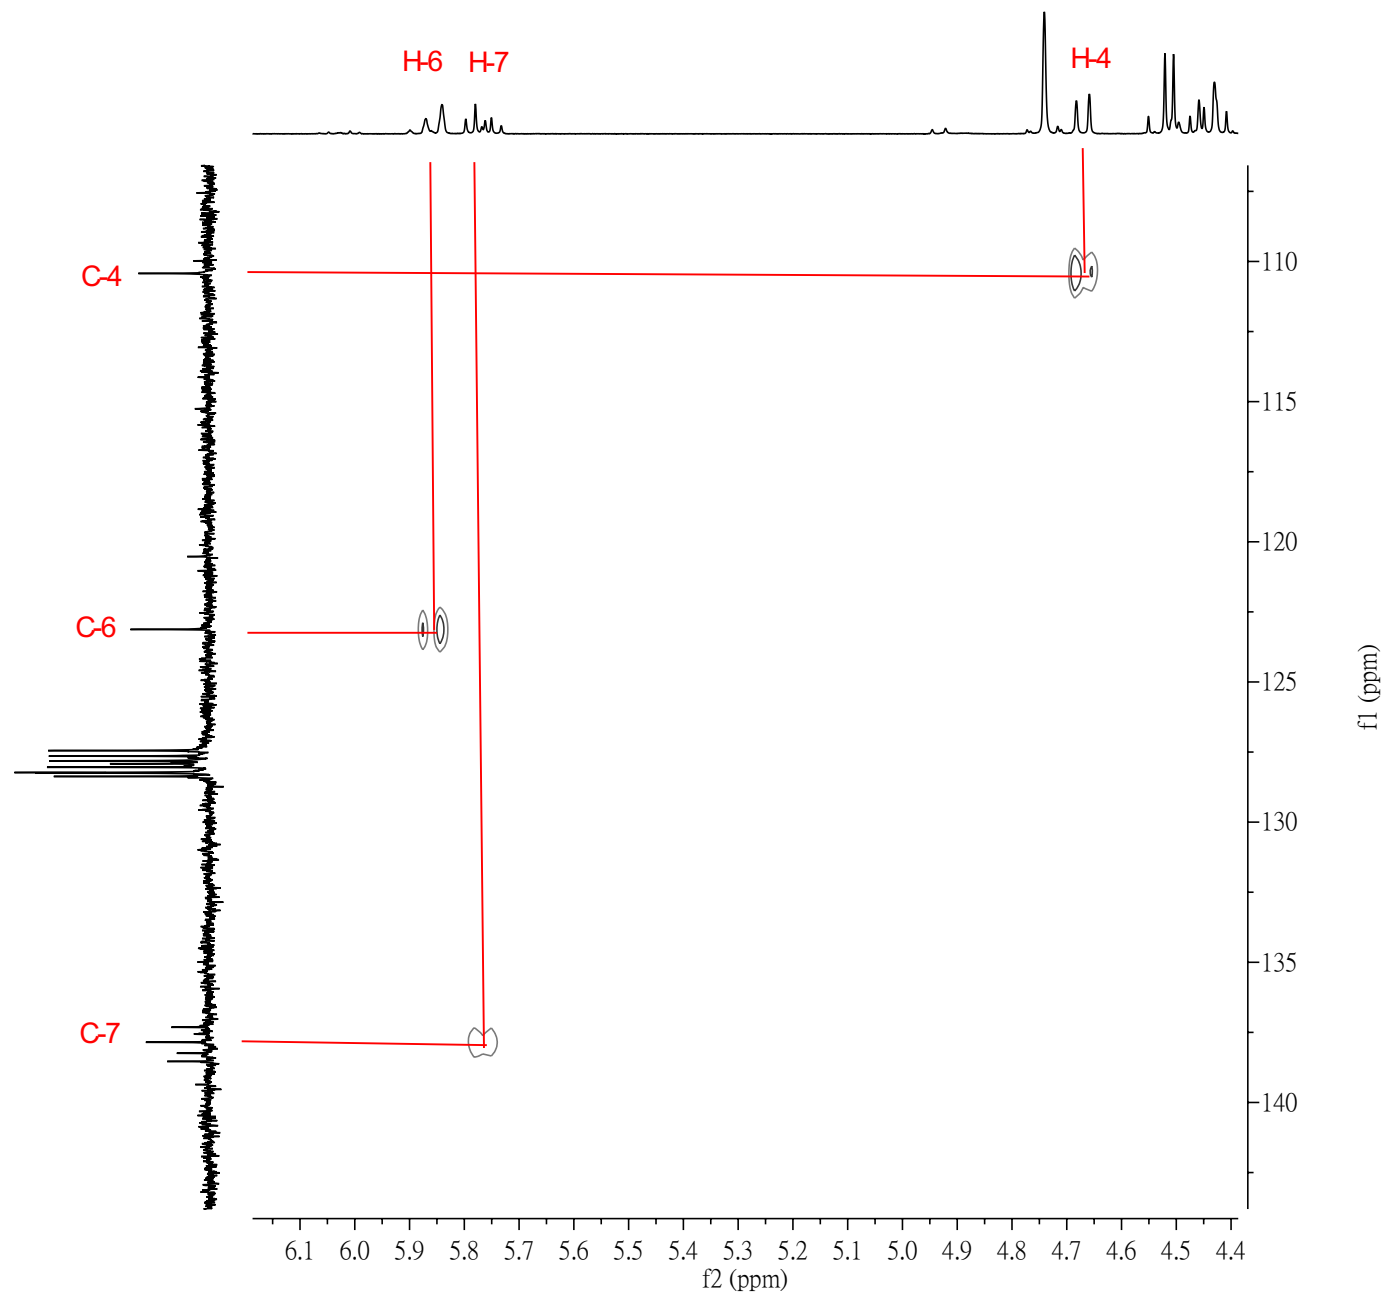

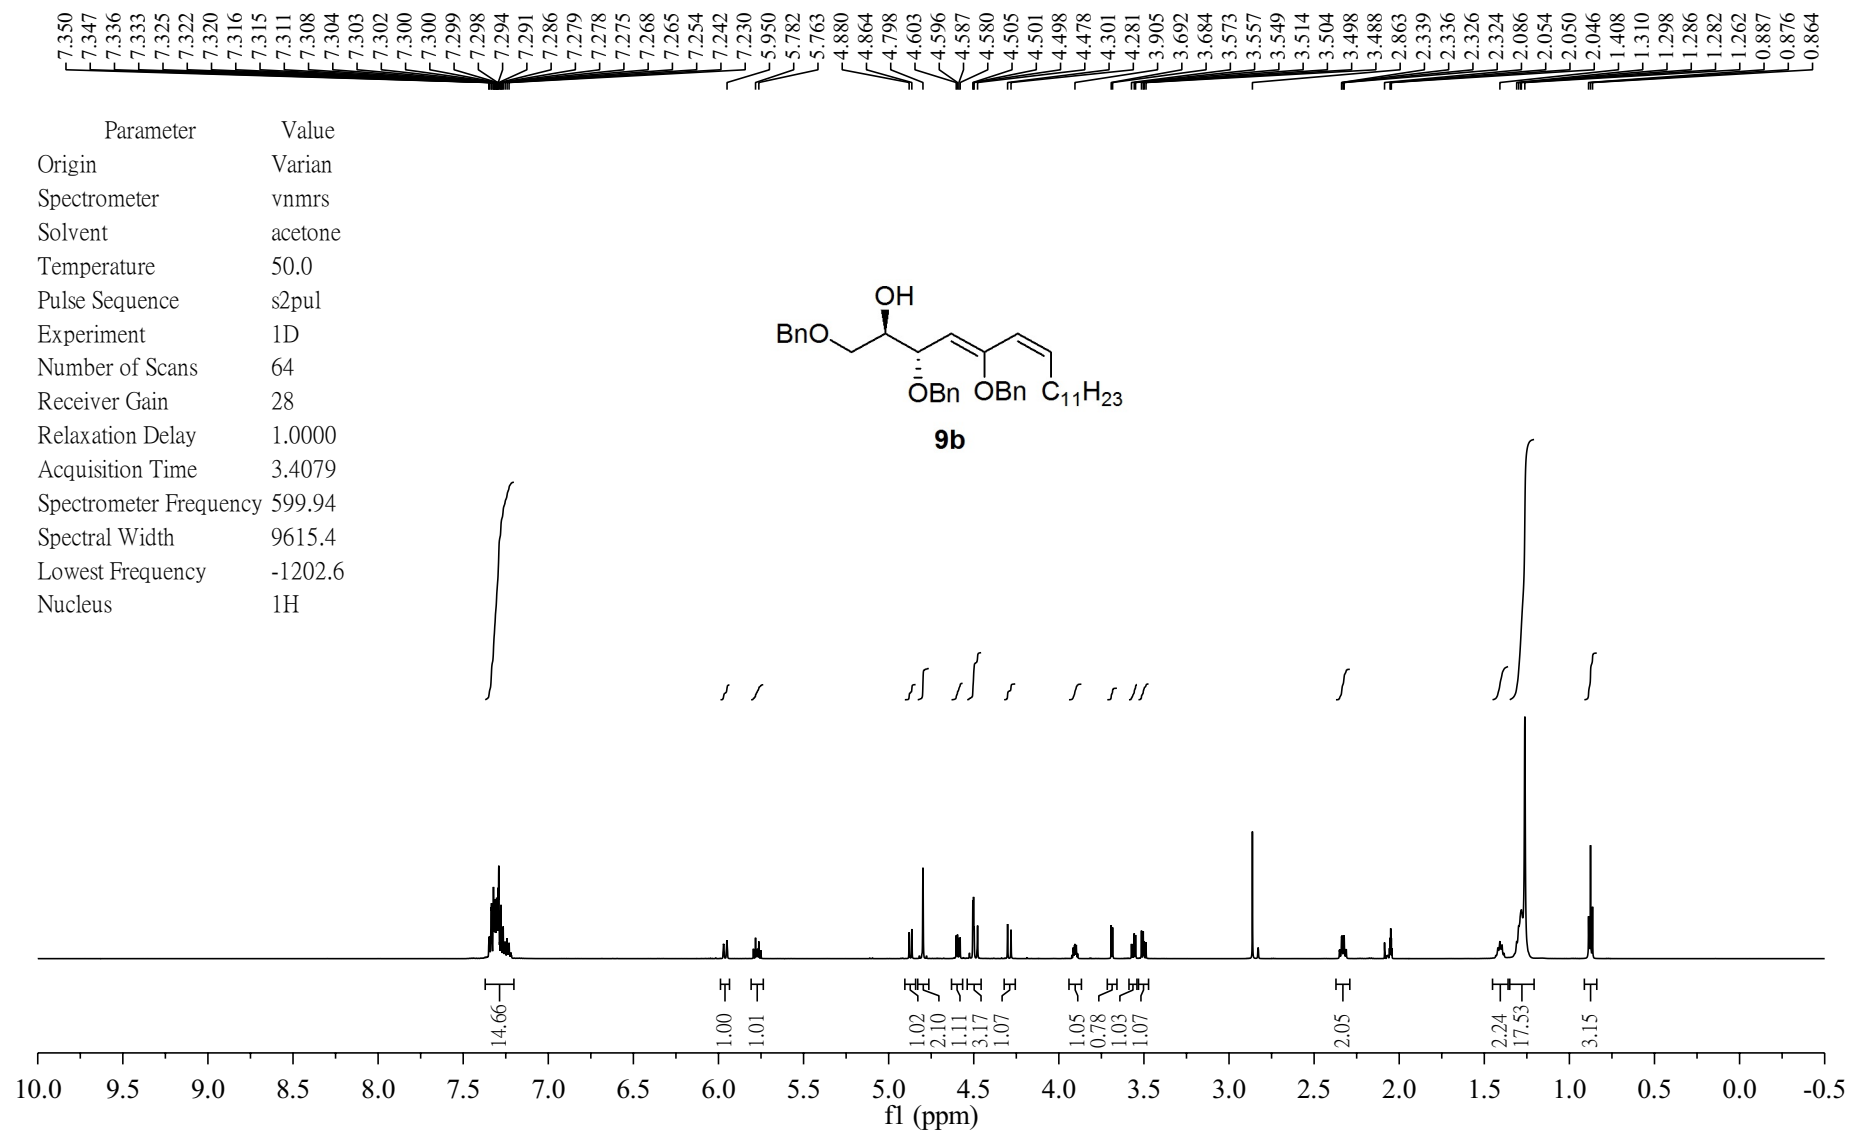

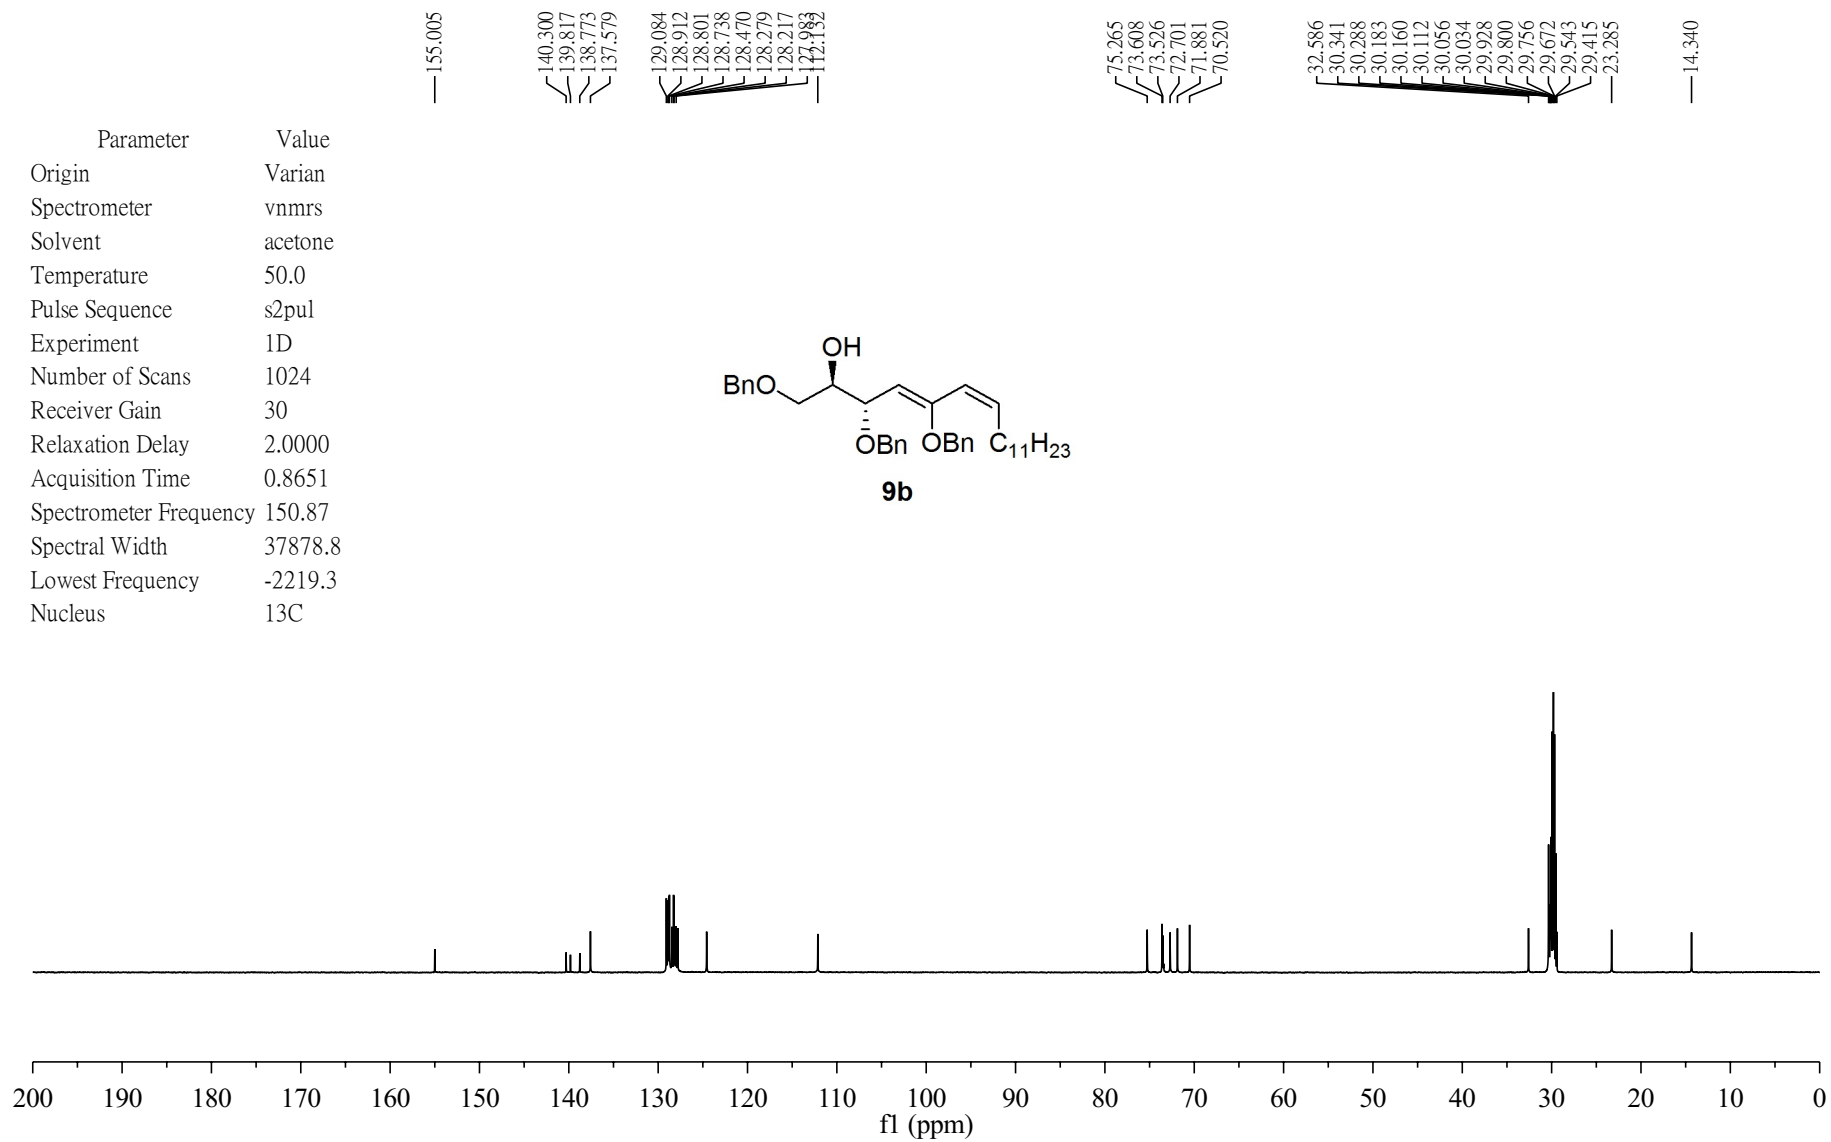

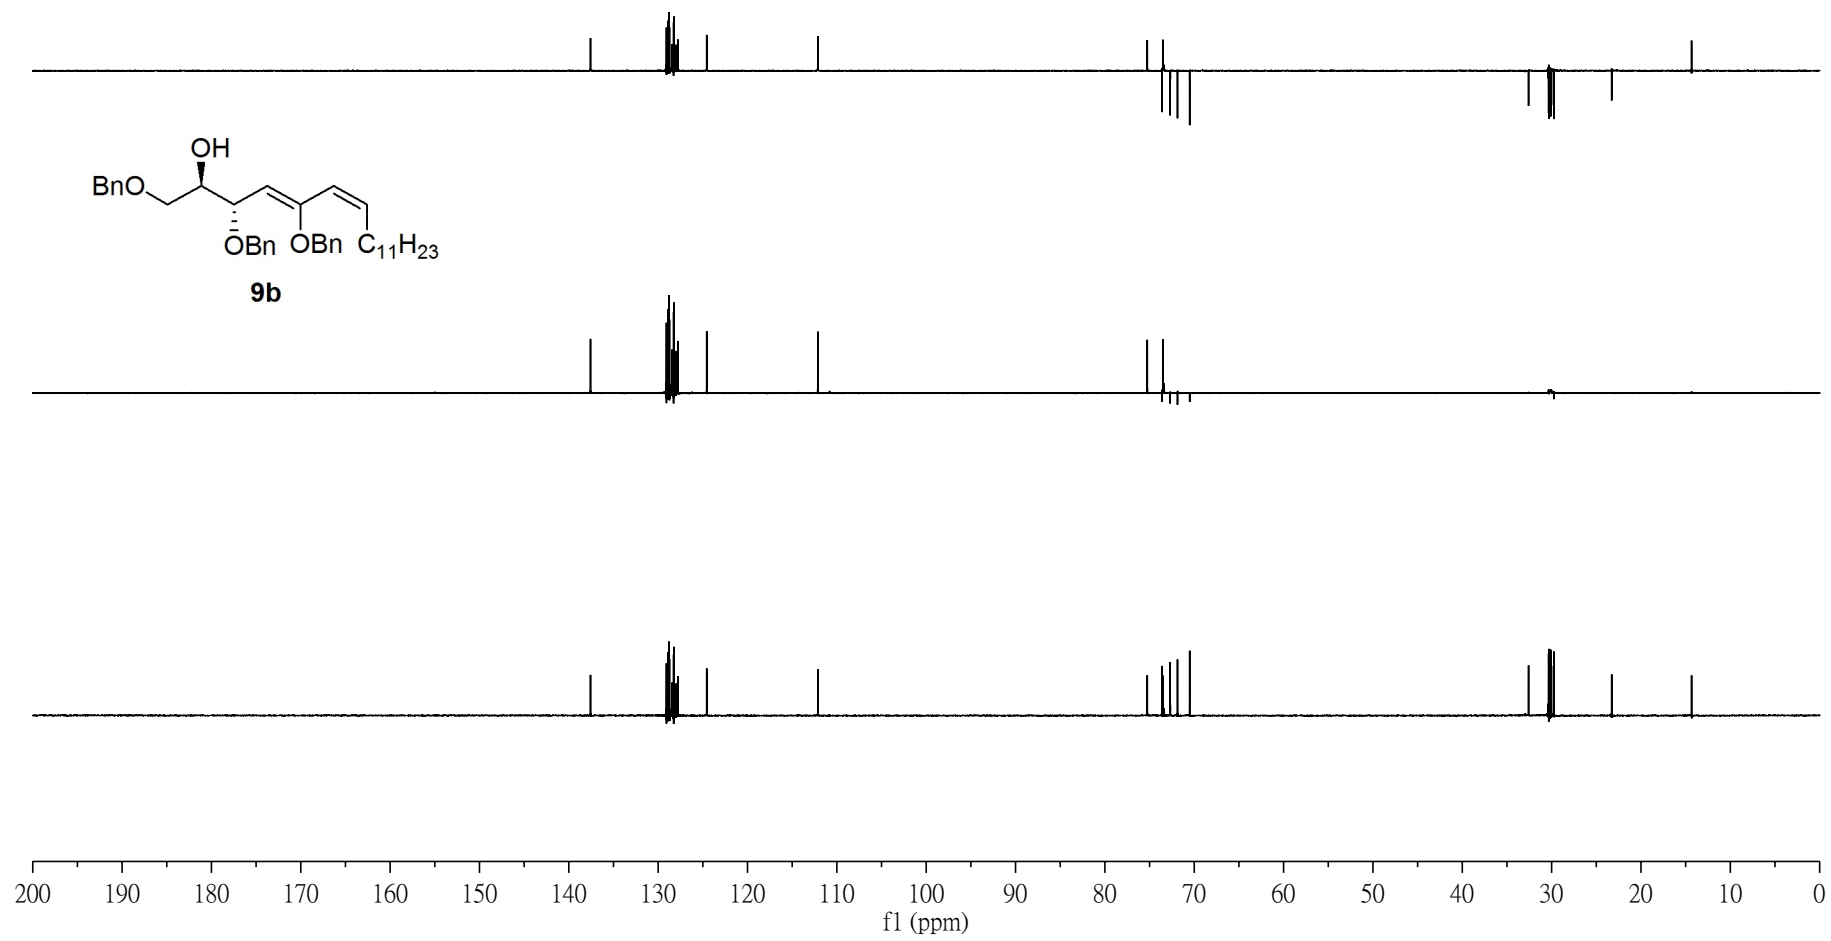



| Parameter              | Value (f2, f1)     |
|------------------------|--------------------|
| Origin                 | Varian             |
| Spectrometer           | nmrs               |
| Solvent                | acetone            |
| Temperature            | 50.0               |
| Pulse Sequence         | gCOSY              |
| Experiment             | 2D-COSY            |
| Number of Scans        | 16                 |
| Receiver Gain          | 30                 |
| Relaxation Delay       | 1.0000             |
| Acquisition Time       | 0.1500             |
| Spectrometer Frequency | (599.94, 599.94)   |
| Spectral Width         | (9615.4, 9615.4)   |
| Lowest Frequency       | (-1200.9, -1205.8) |
| Nucleus                | (1H, 1H)           |
| Acquired Size          | (1442, 256)        |
| Spectral Size          | (2048, 2048)       |

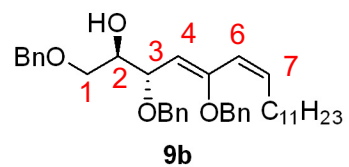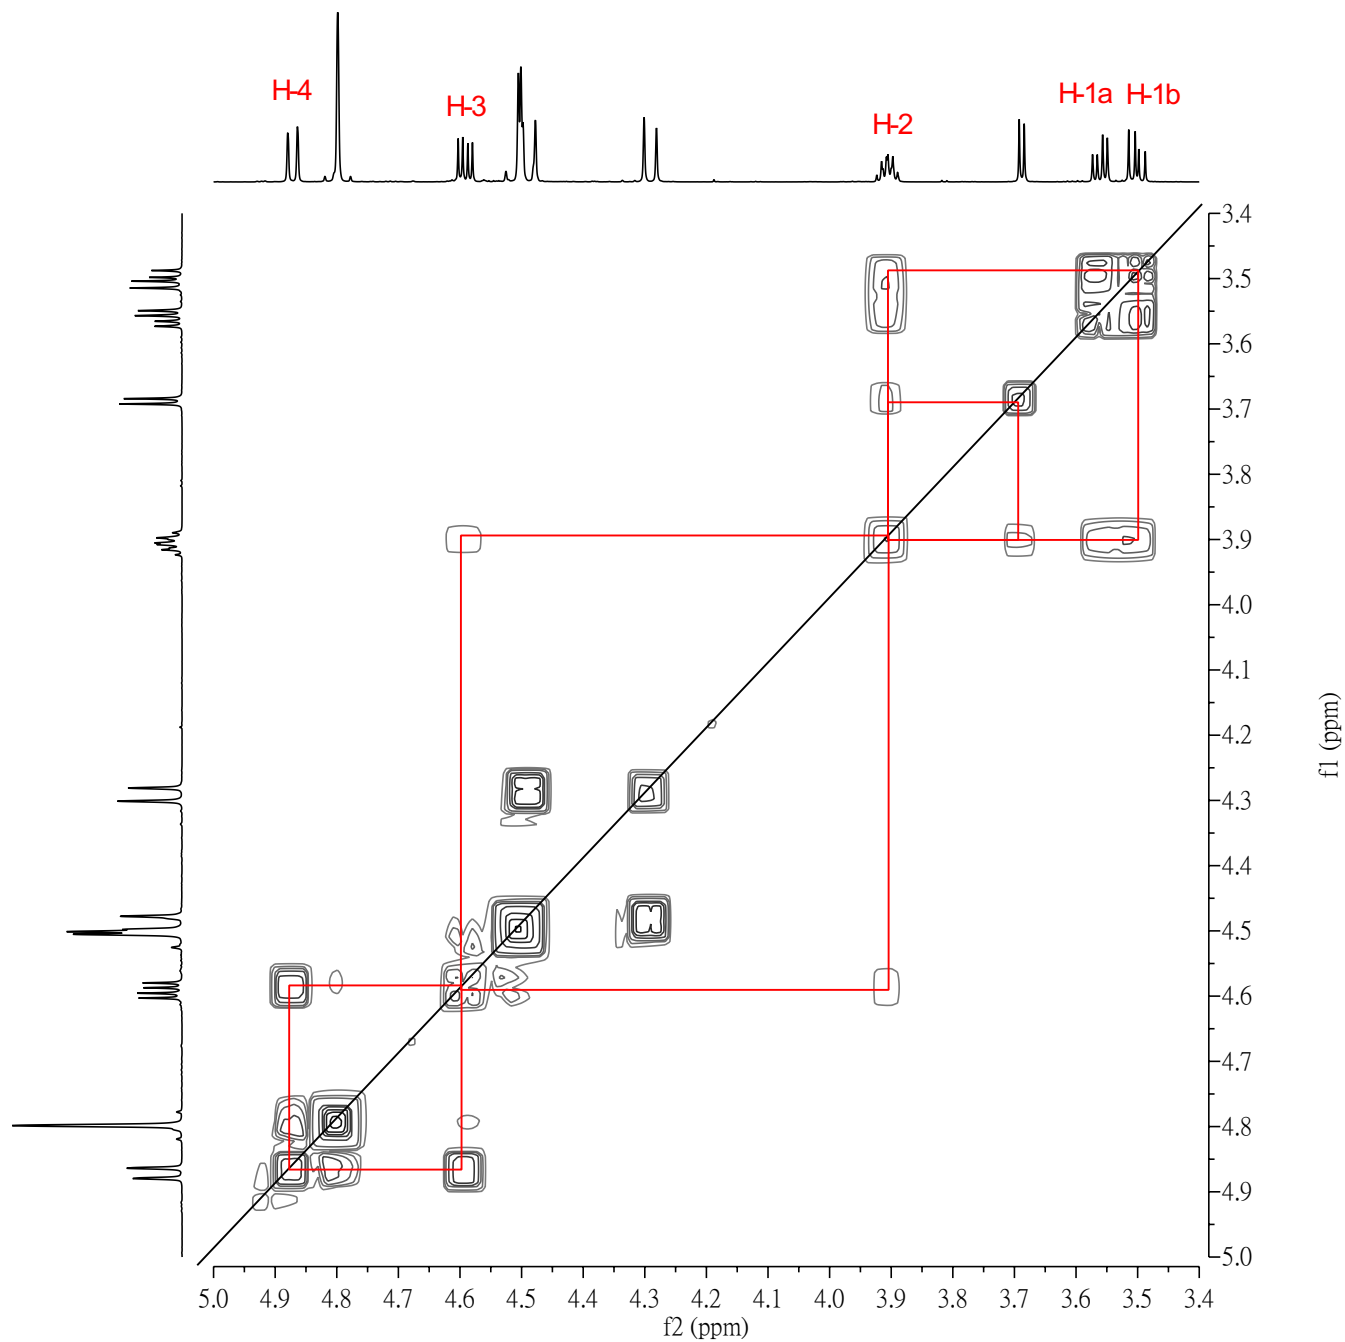

| Parameter                               | Value (f2, f1)     |
|-----------------------------------------|--------------------|
| Origin                                  | Varian             |
| Spectrometer                            | vnmrs              |
| Solvent                                 | acetone            |
| Temperature                             | 50.0               |
| Pulse Sequence                          | gHSQCAD            |
| Experiment                              | 2D-HSQC-EDITED     |
| Number of Scans                         | 32                 |
| Receiver Gain                           | 30                 |
| Relaxation Delay                        | 1.0000             |
| Acquisition Time                        | 0.1500             |
| Spectrometer Frequency (599.94, 150.87) |                    |
| Spectral Width                          | (9615.4, 30165.9)  |
| Lowest Frequency                        | (-1200.9, -1361.9) |
| Nucleus                                 | (1H, 13C)          |
| Acquired Size                           | (1442, 256)        |
| Spectral Size                           | (2048, 2048)       |

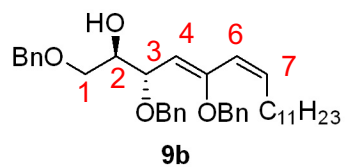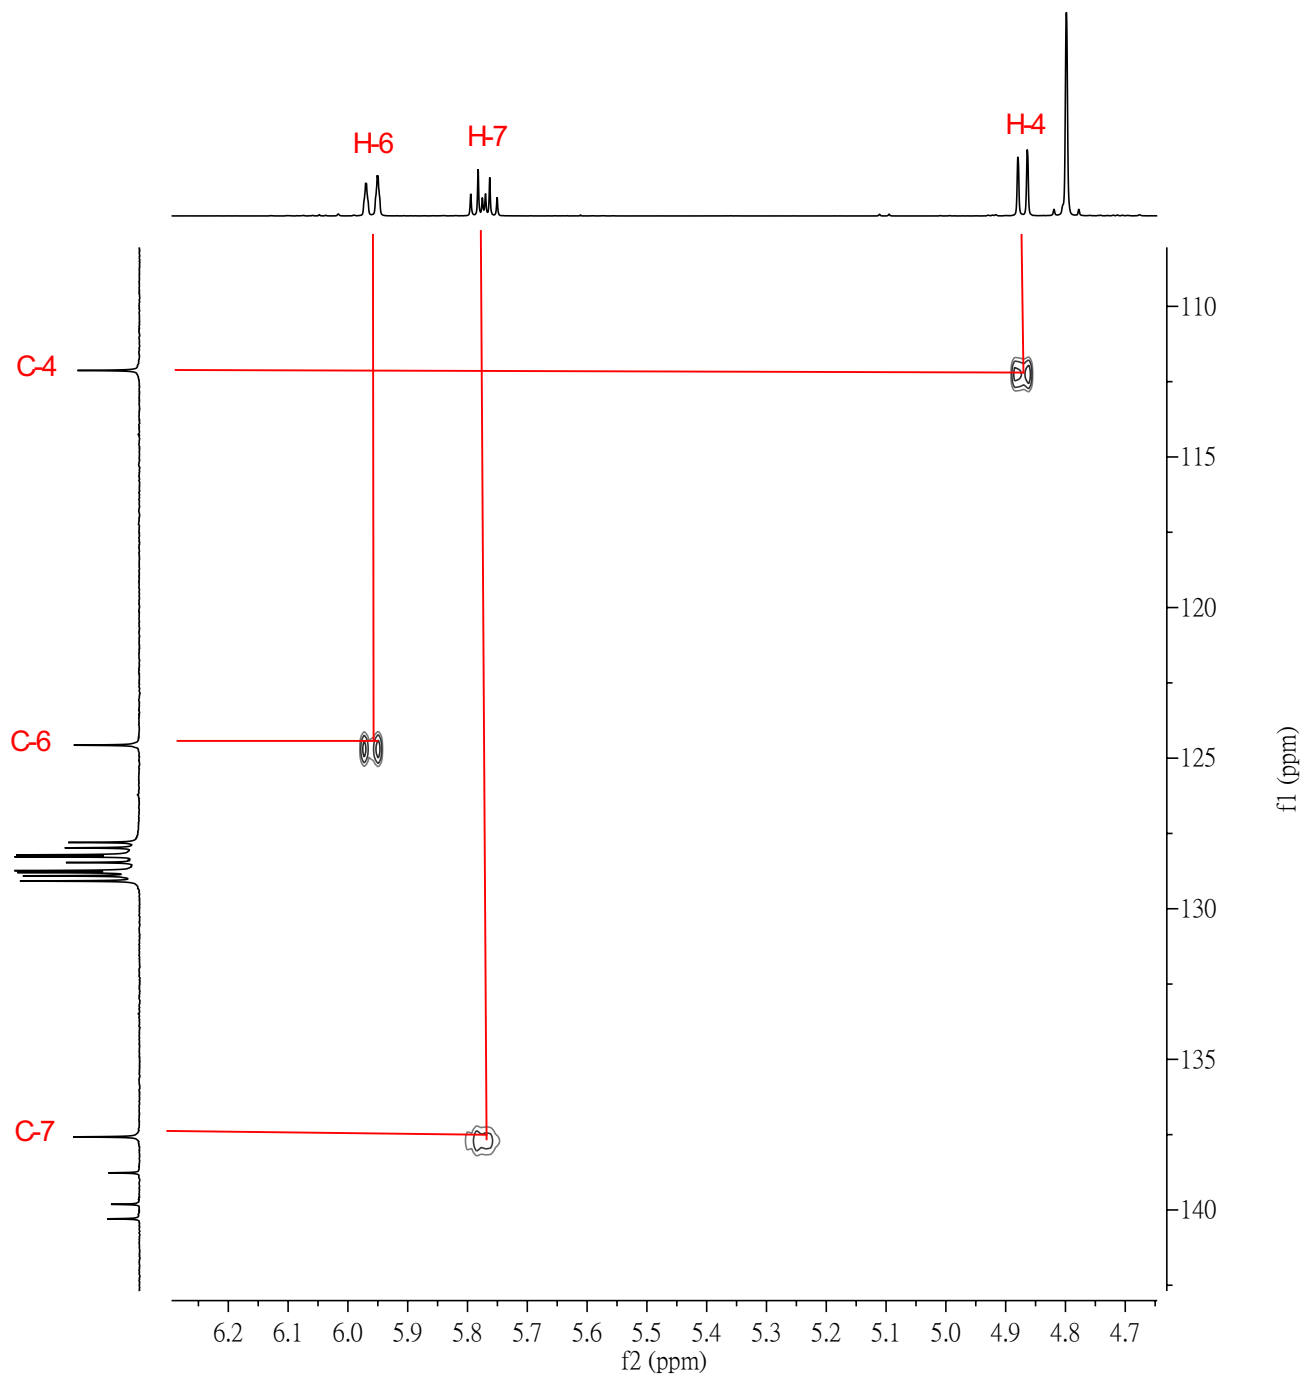

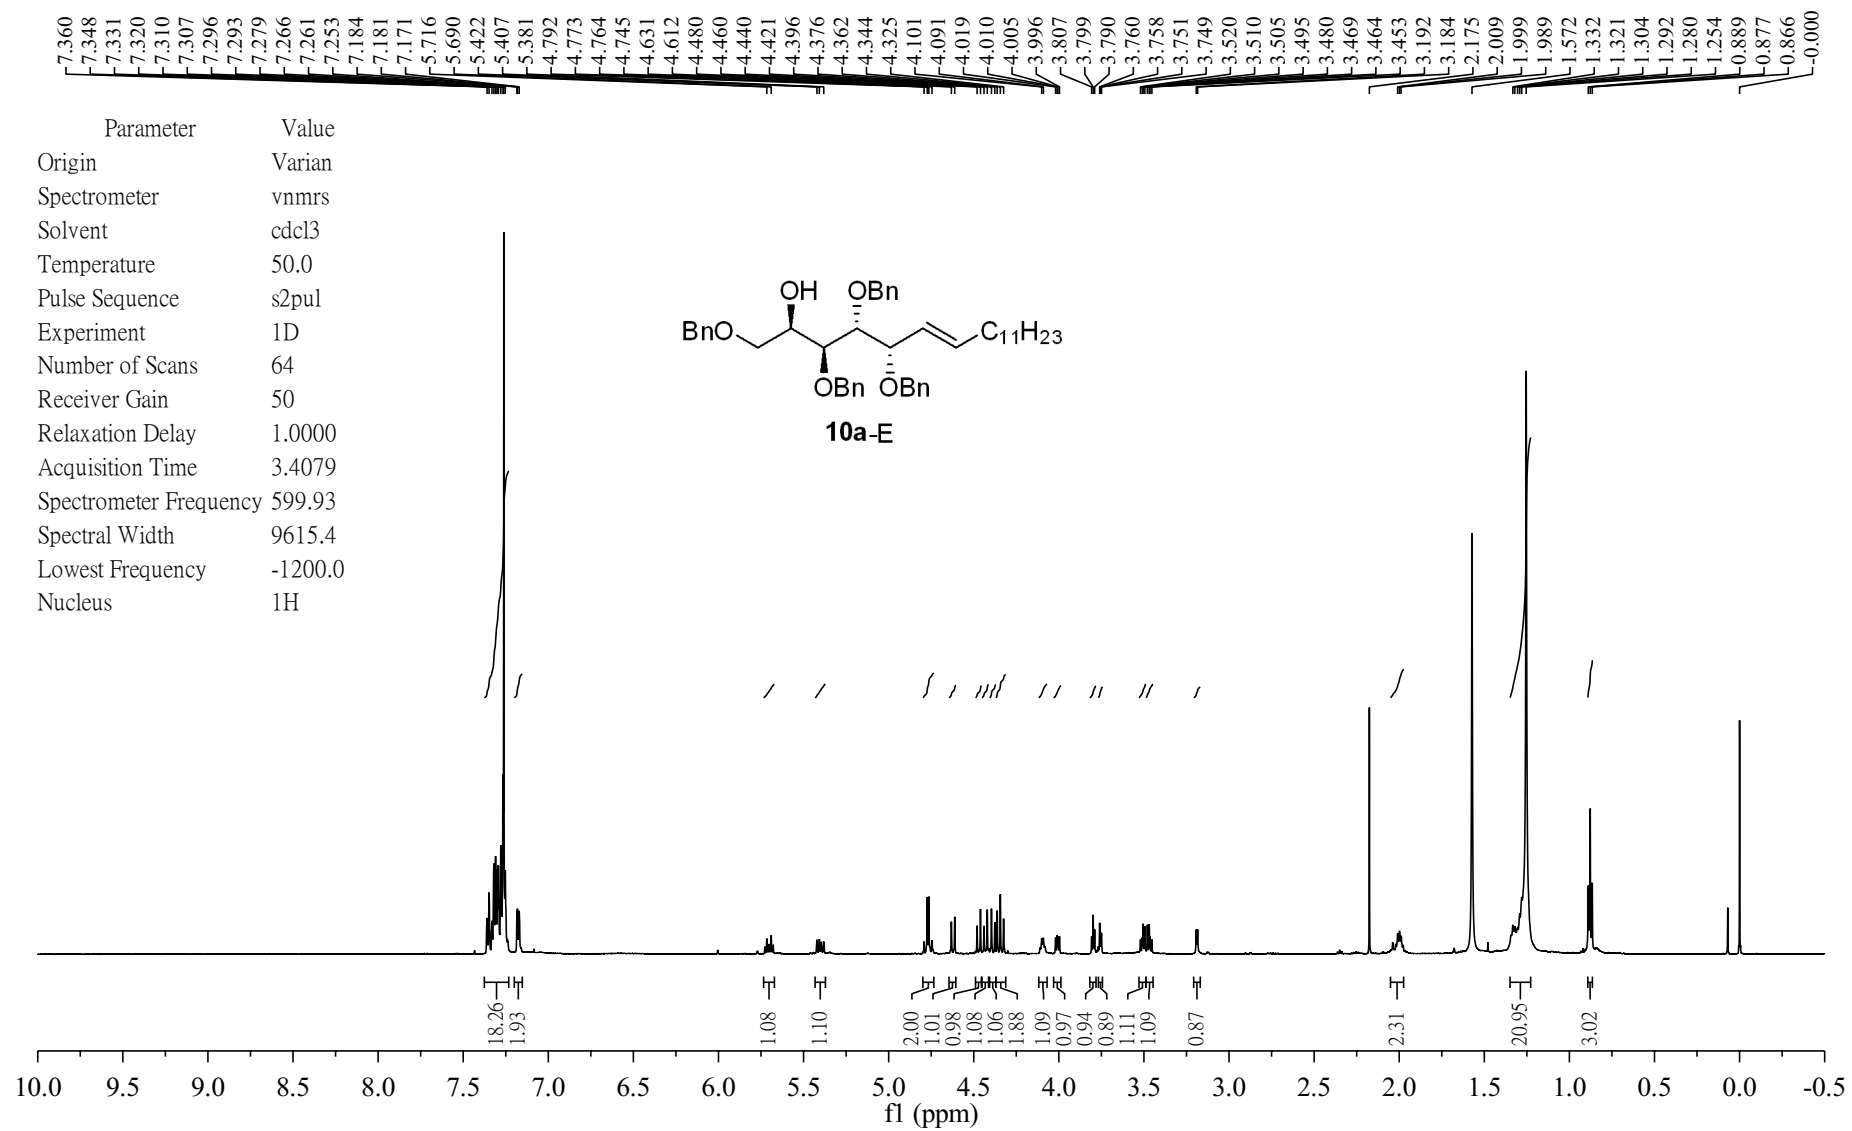

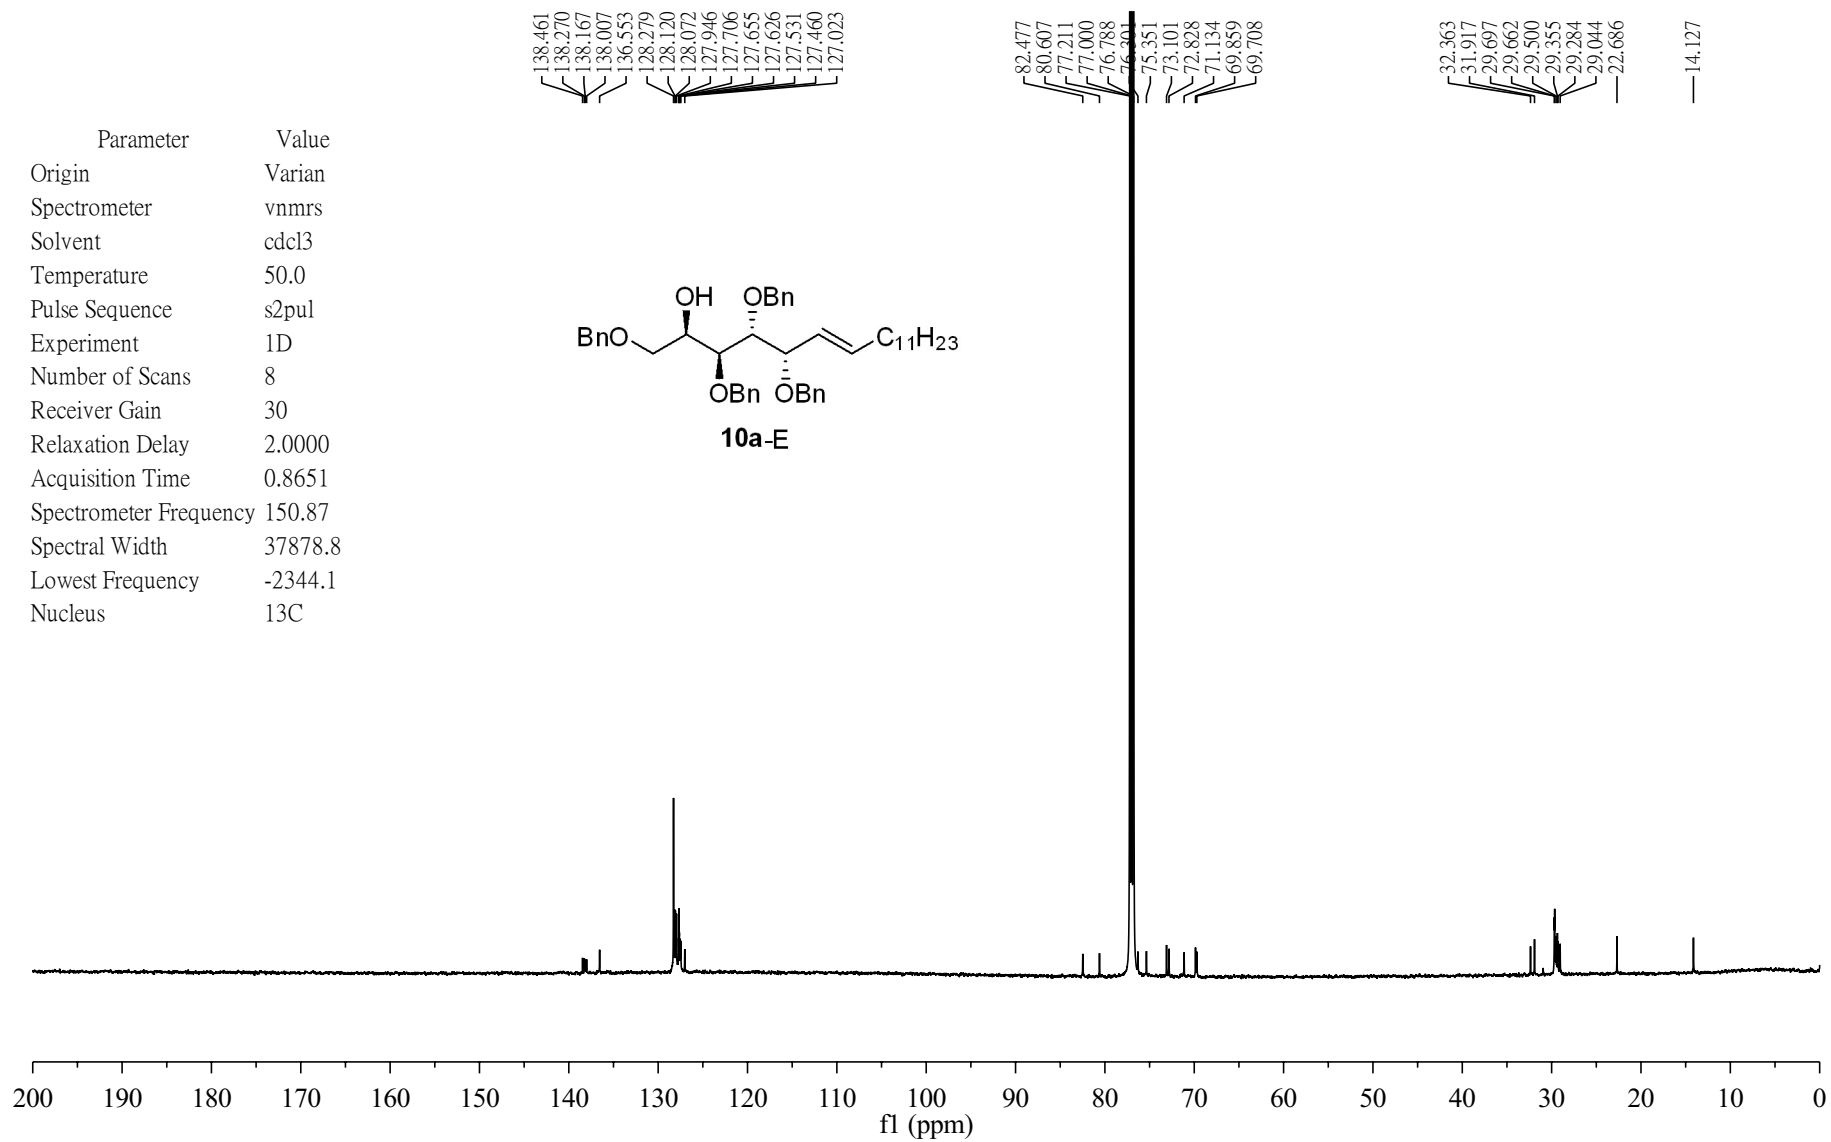

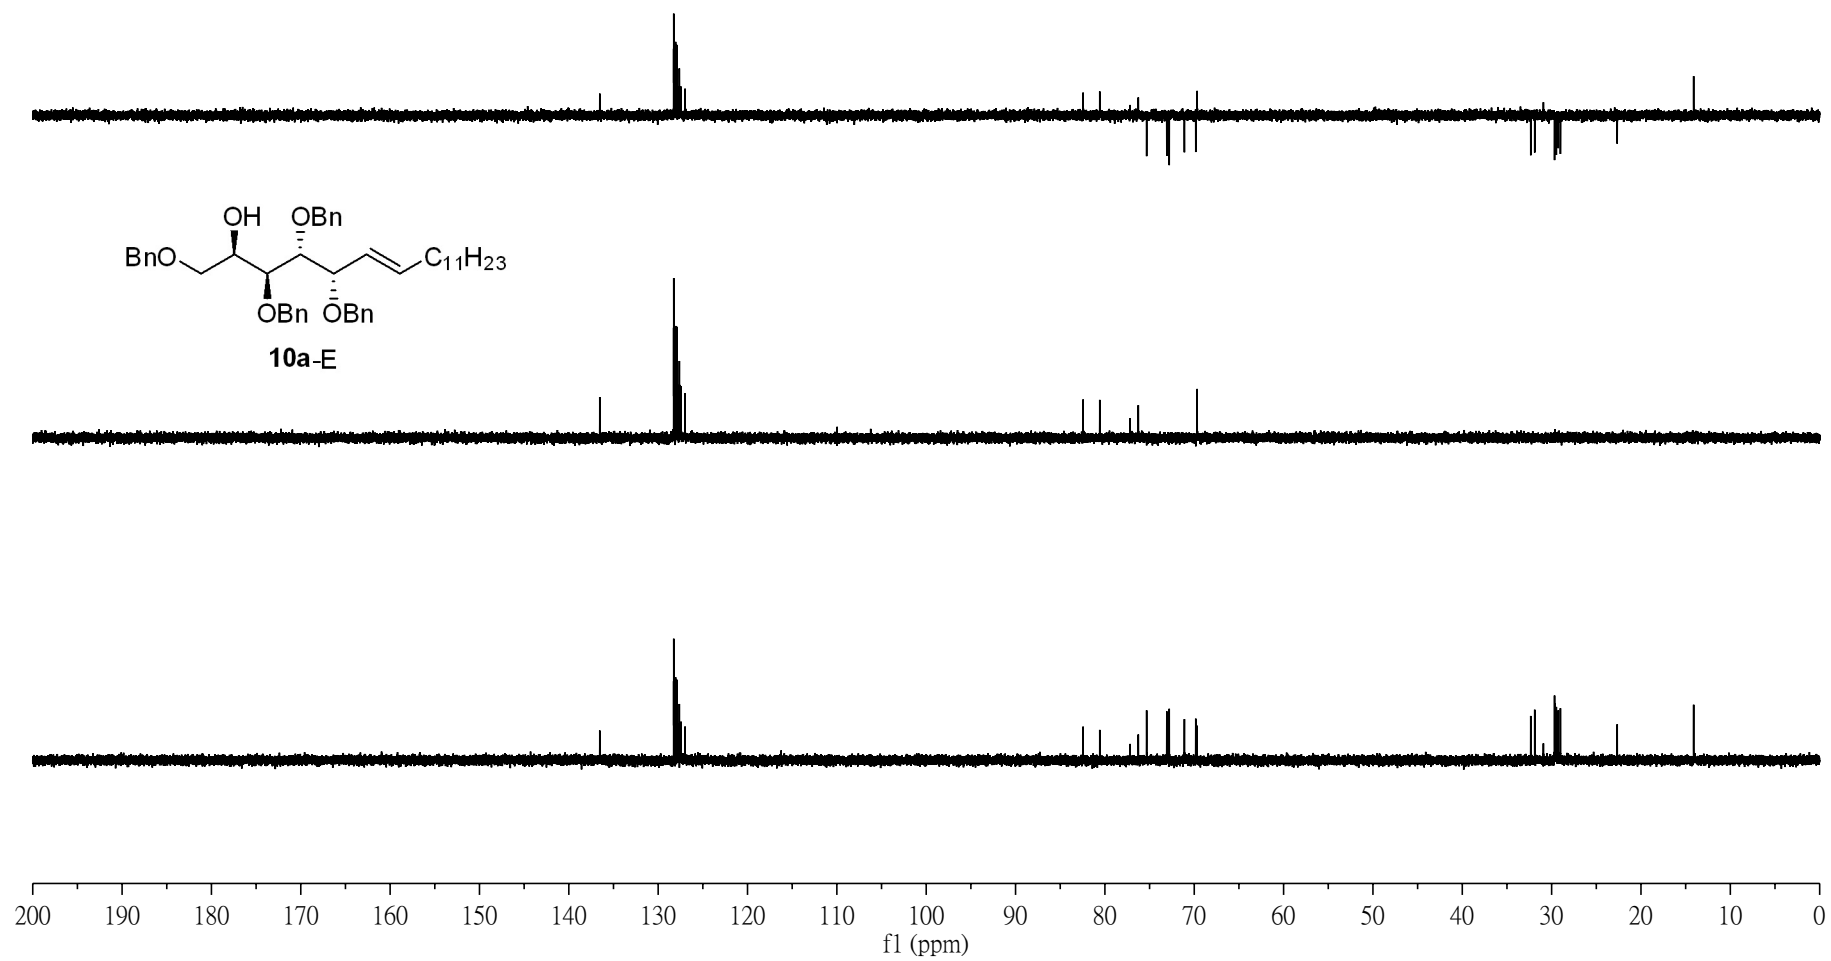

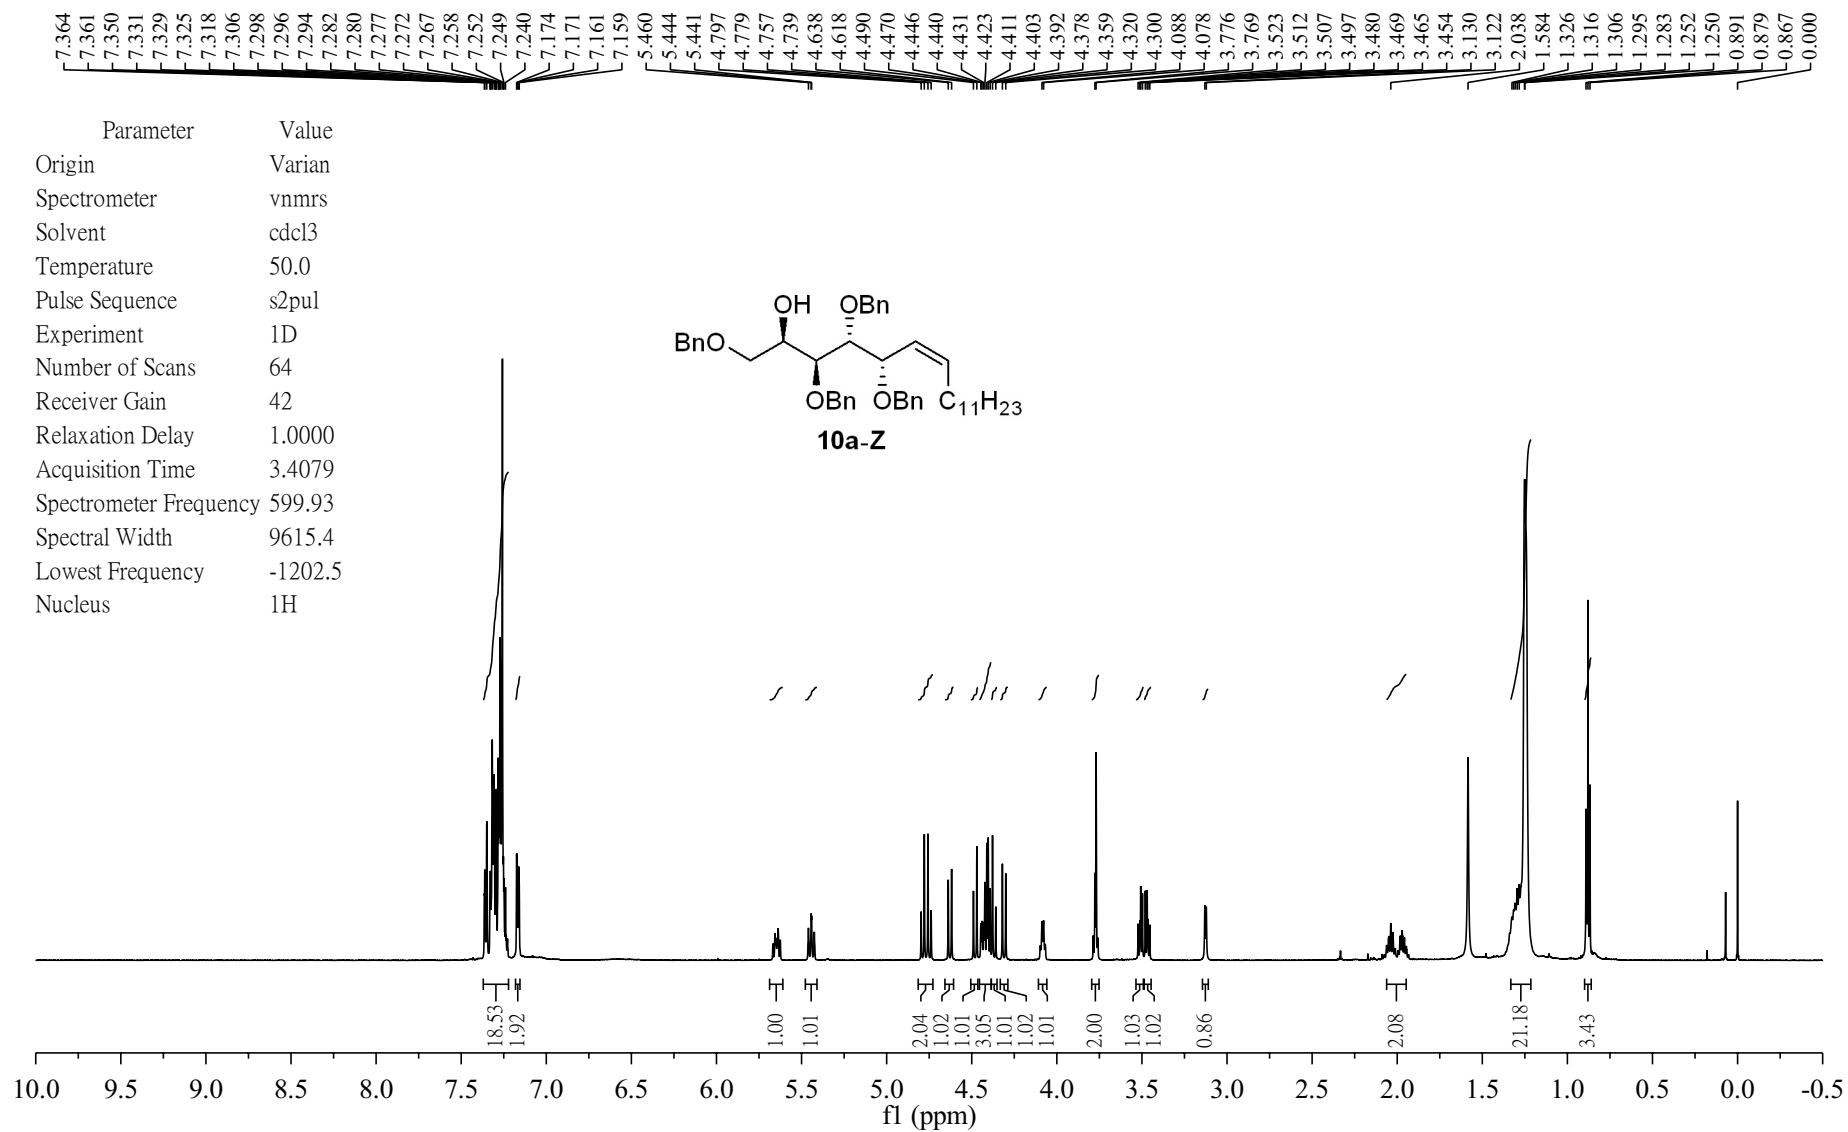

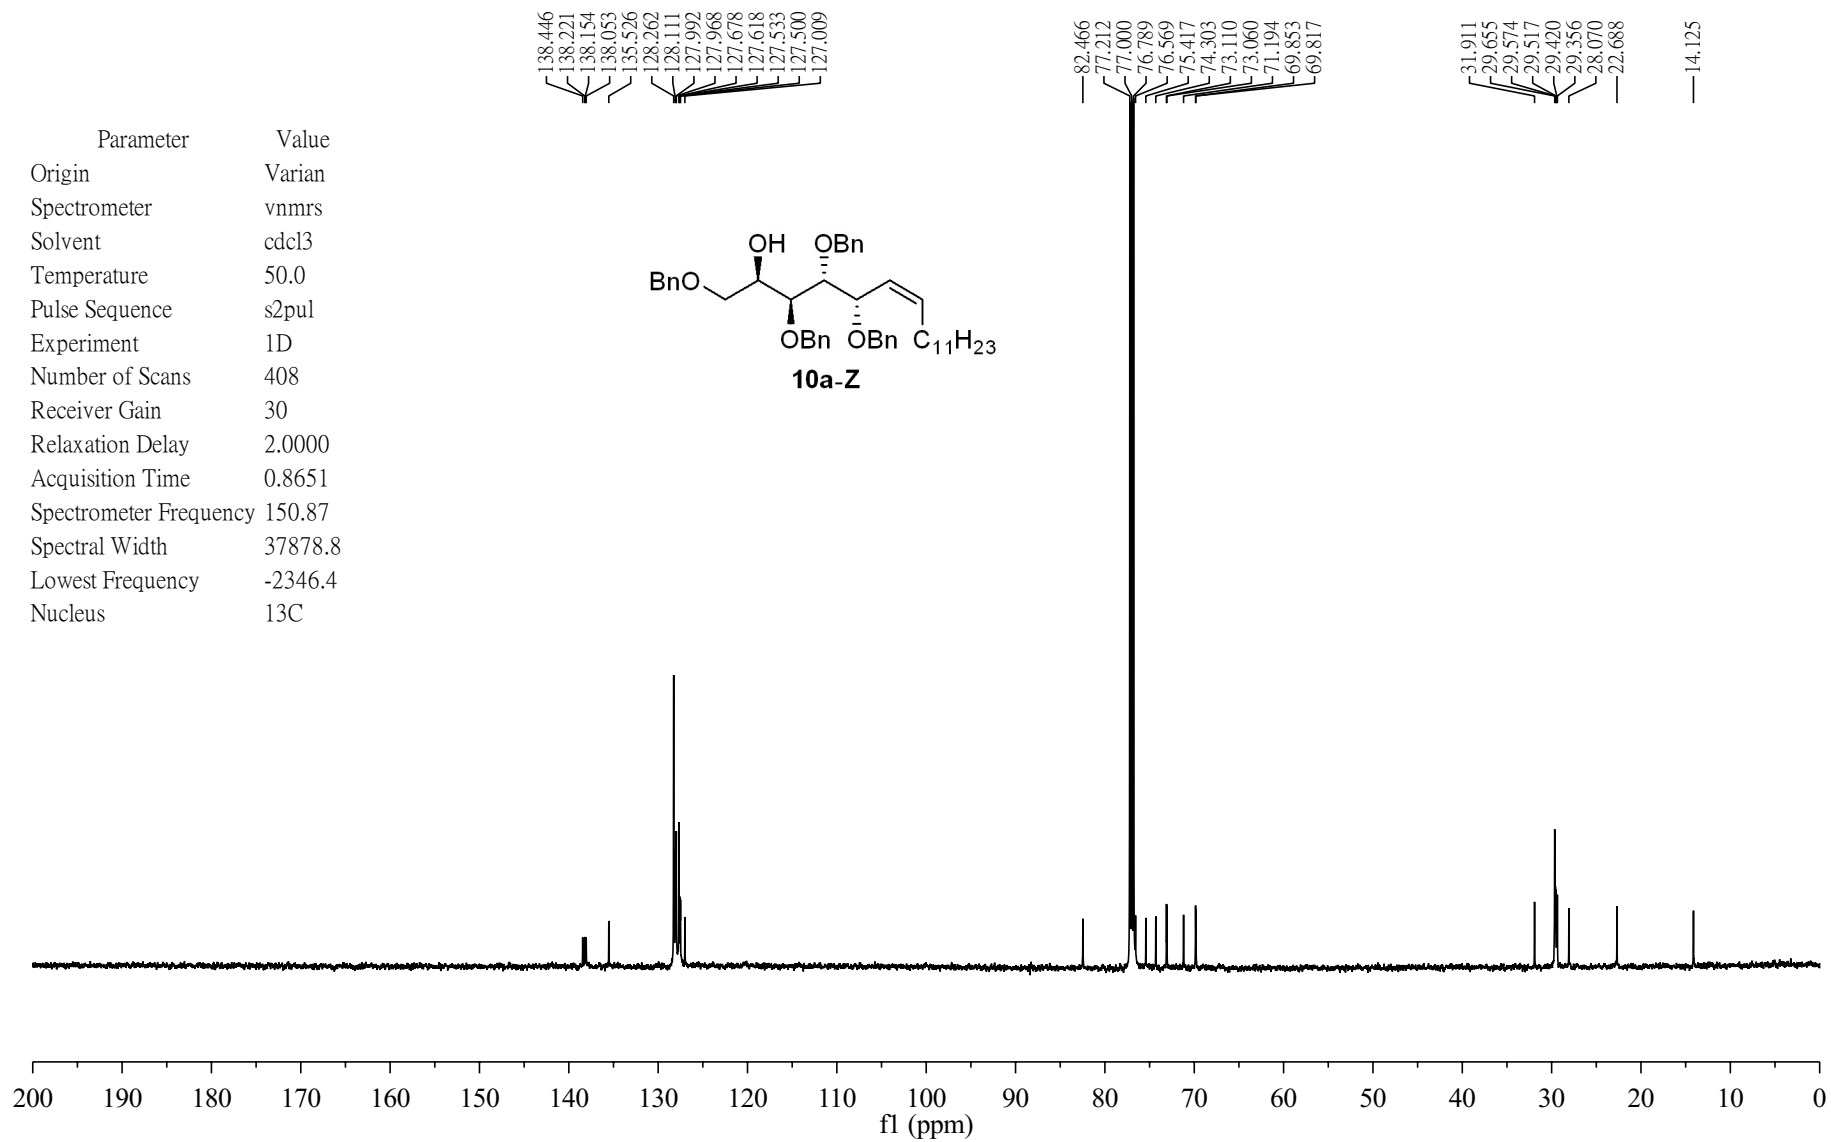

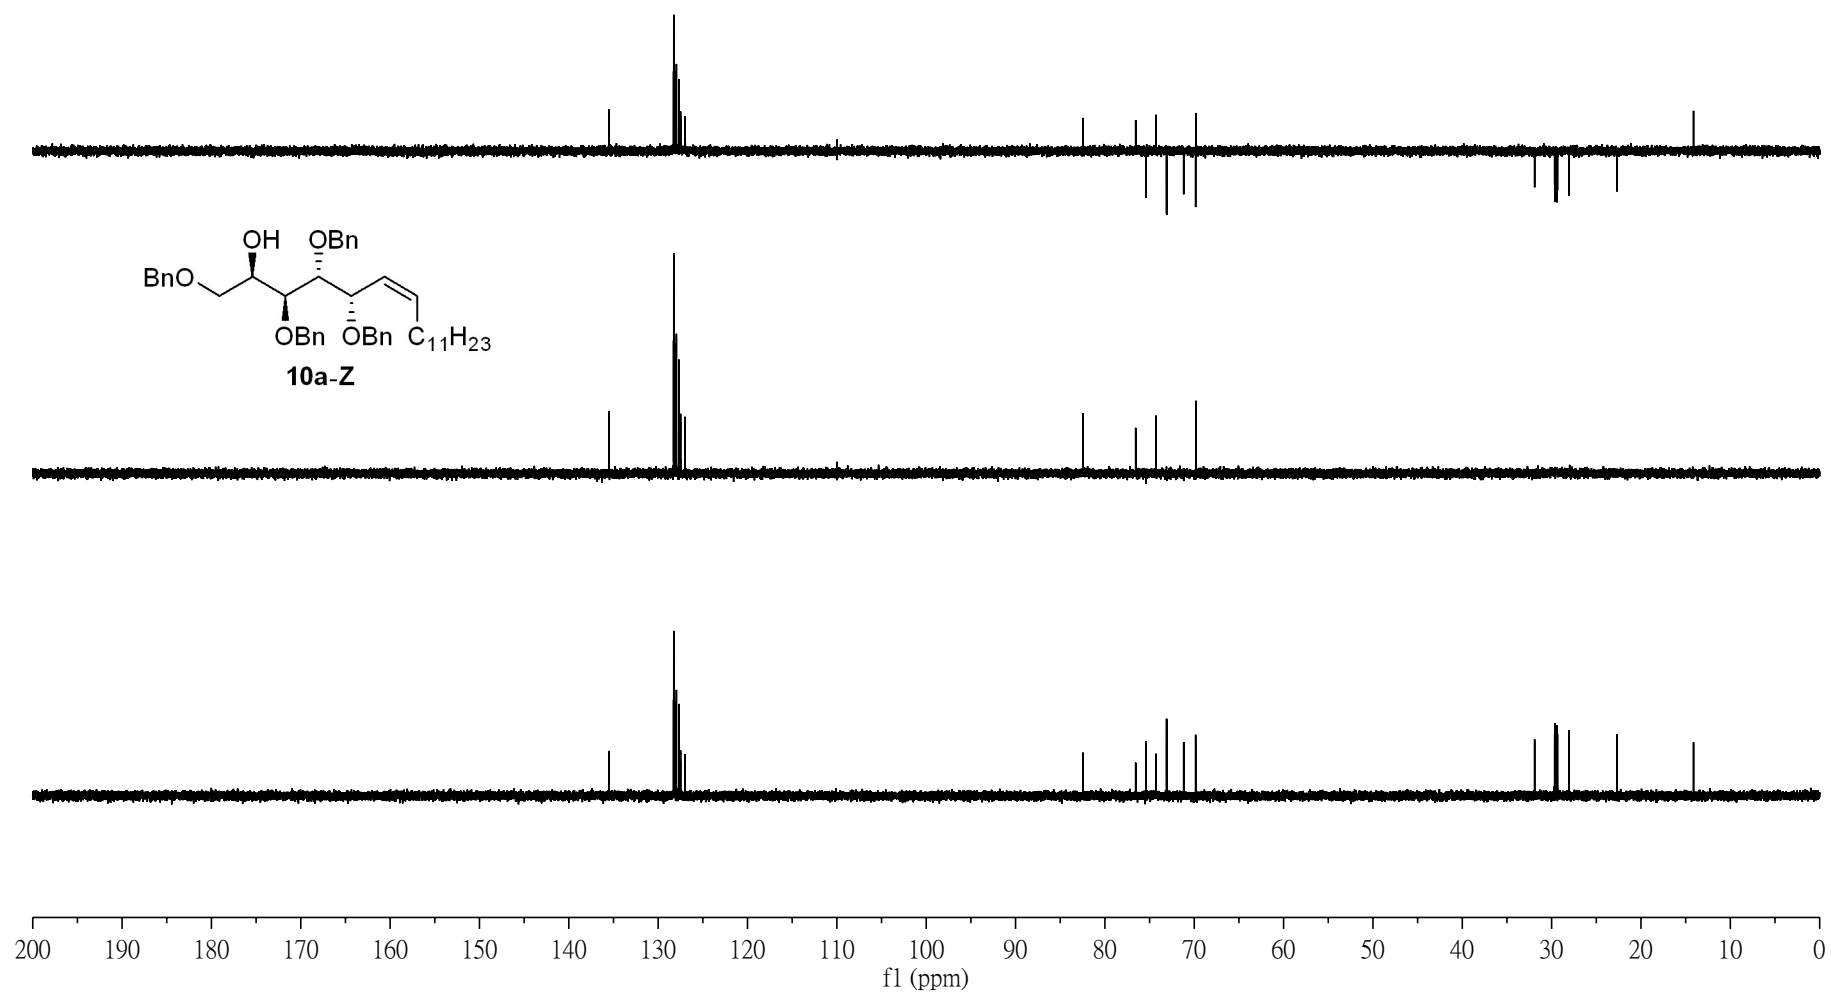



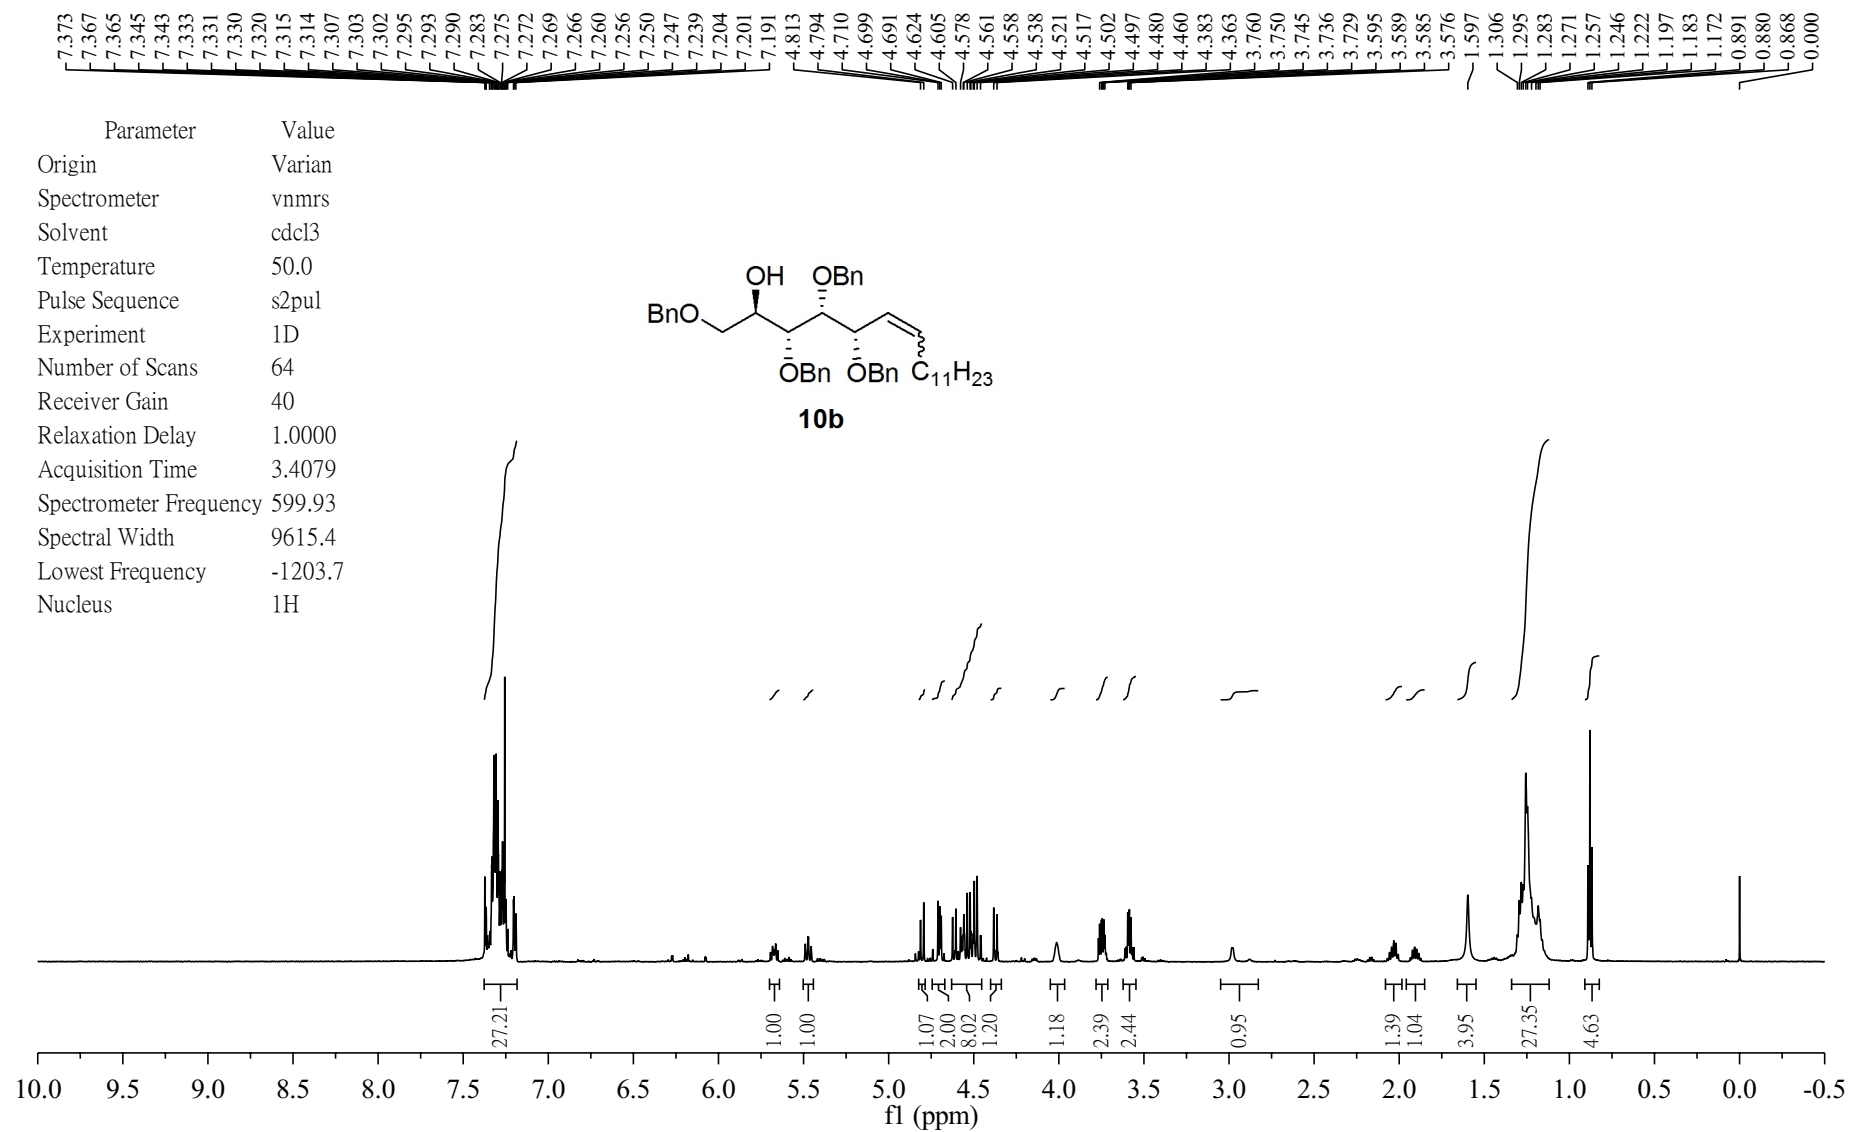

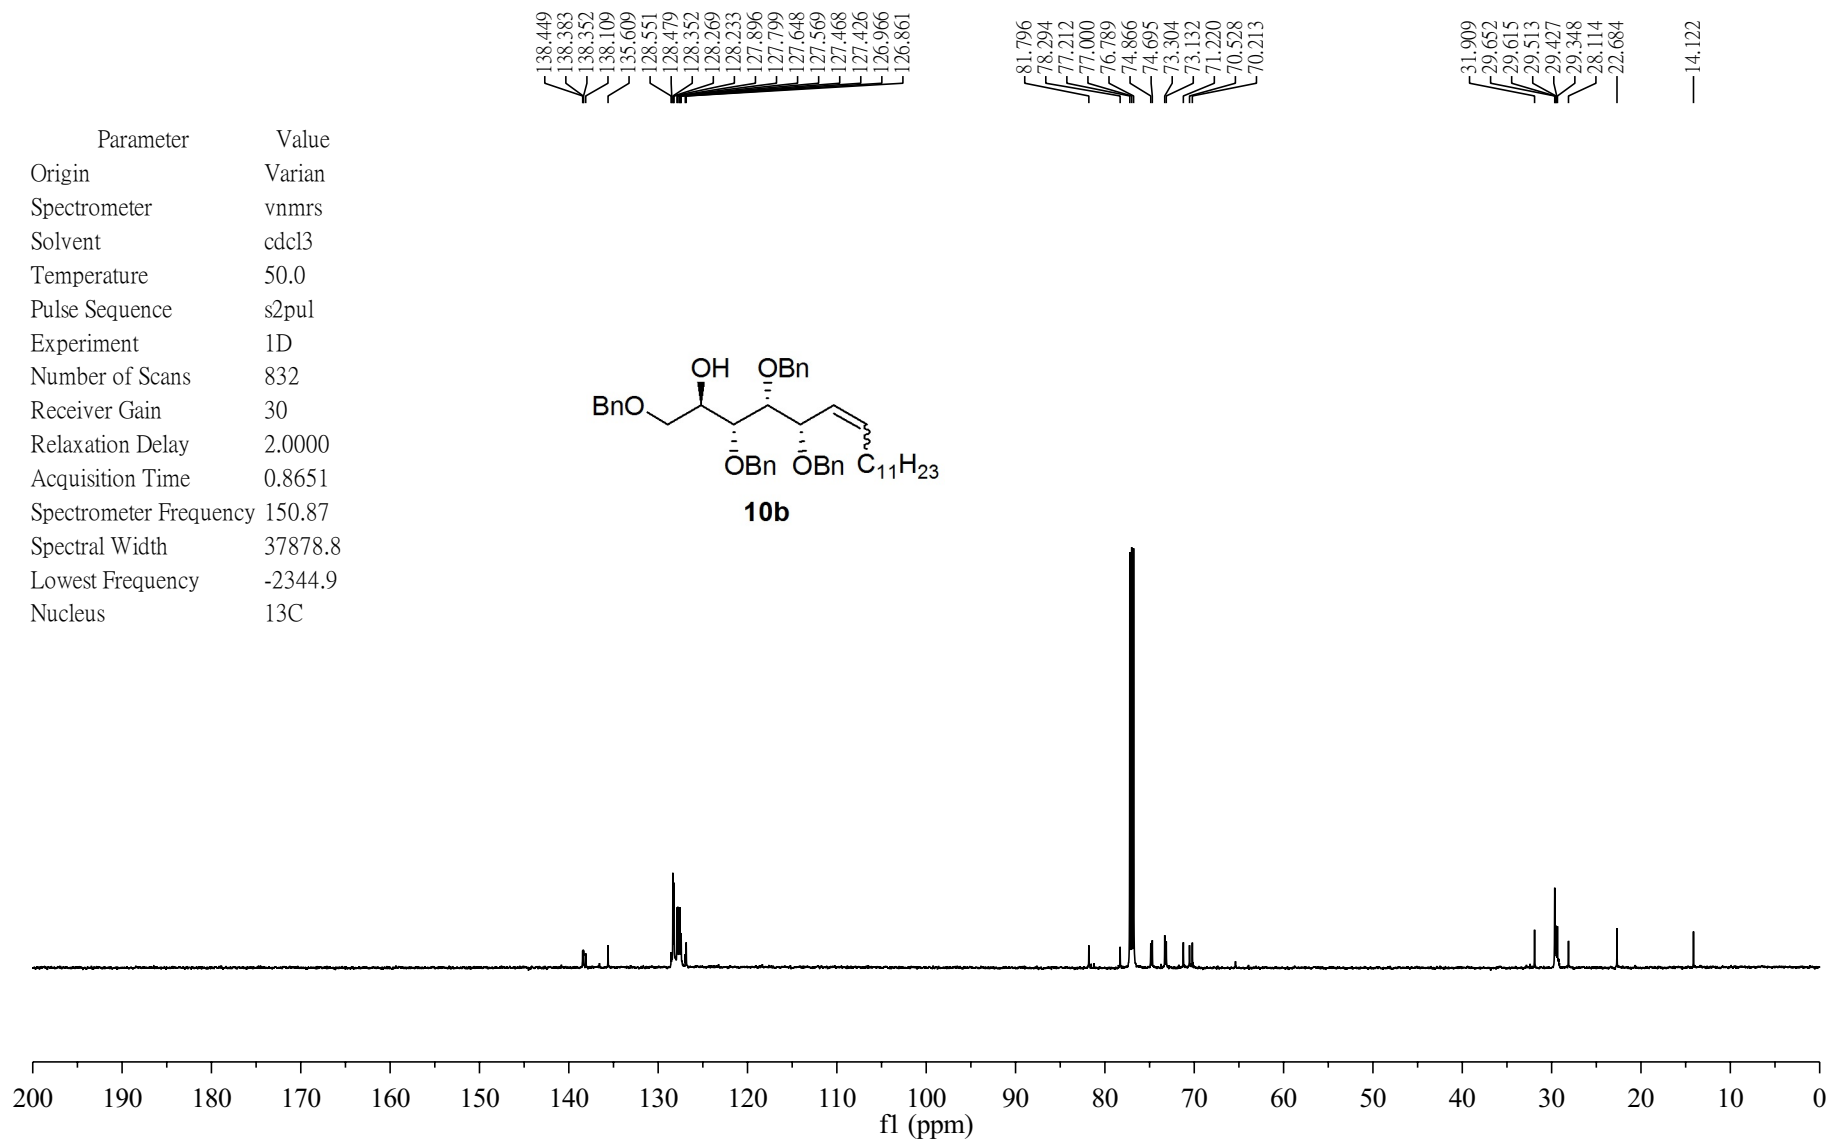

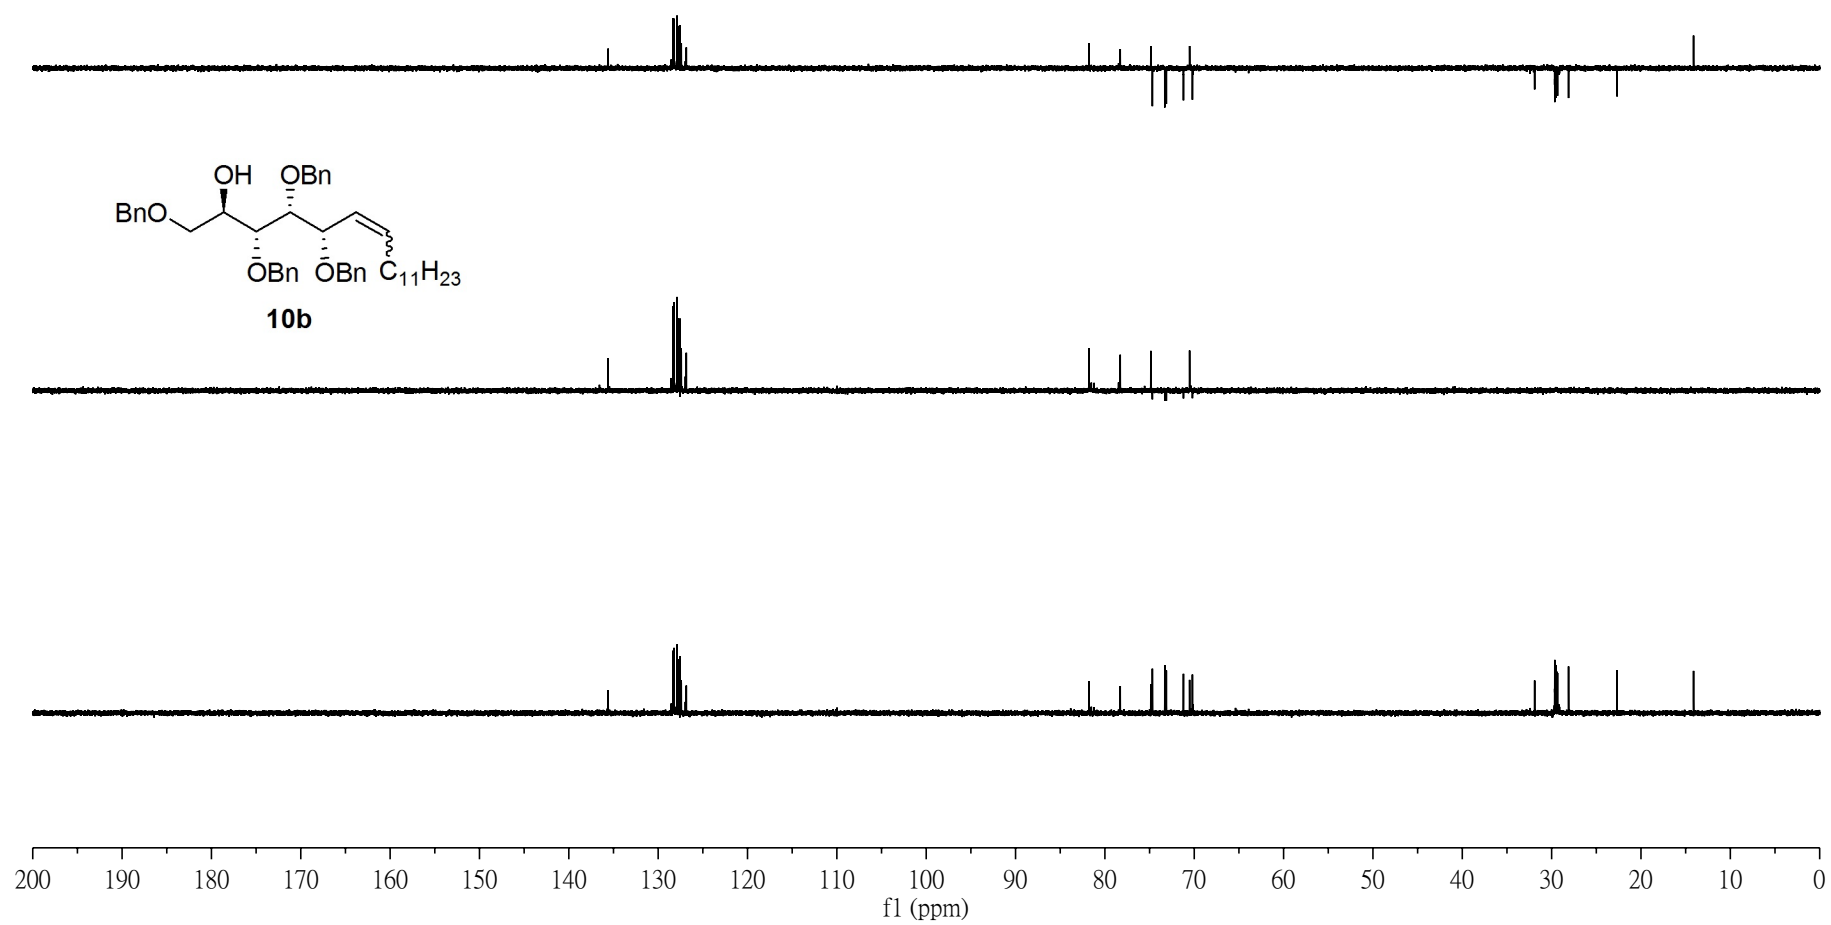

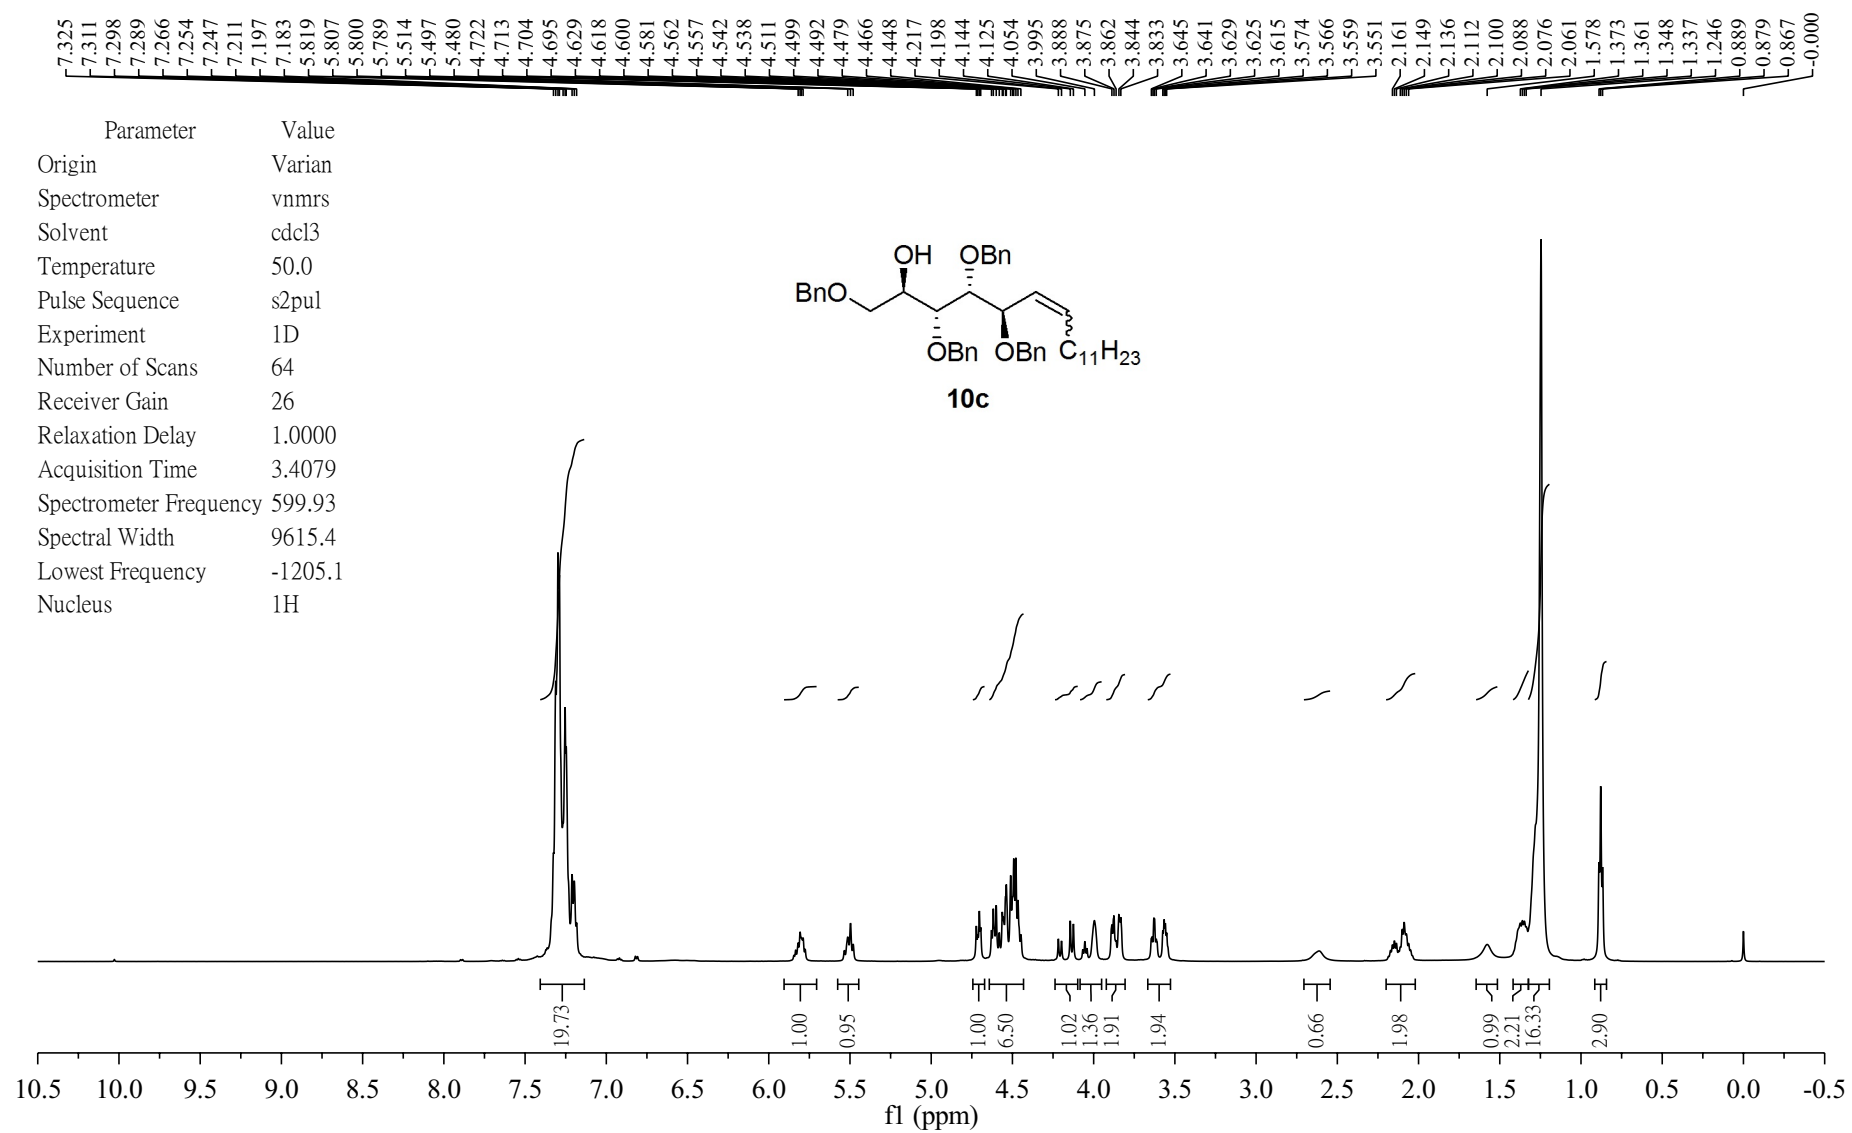

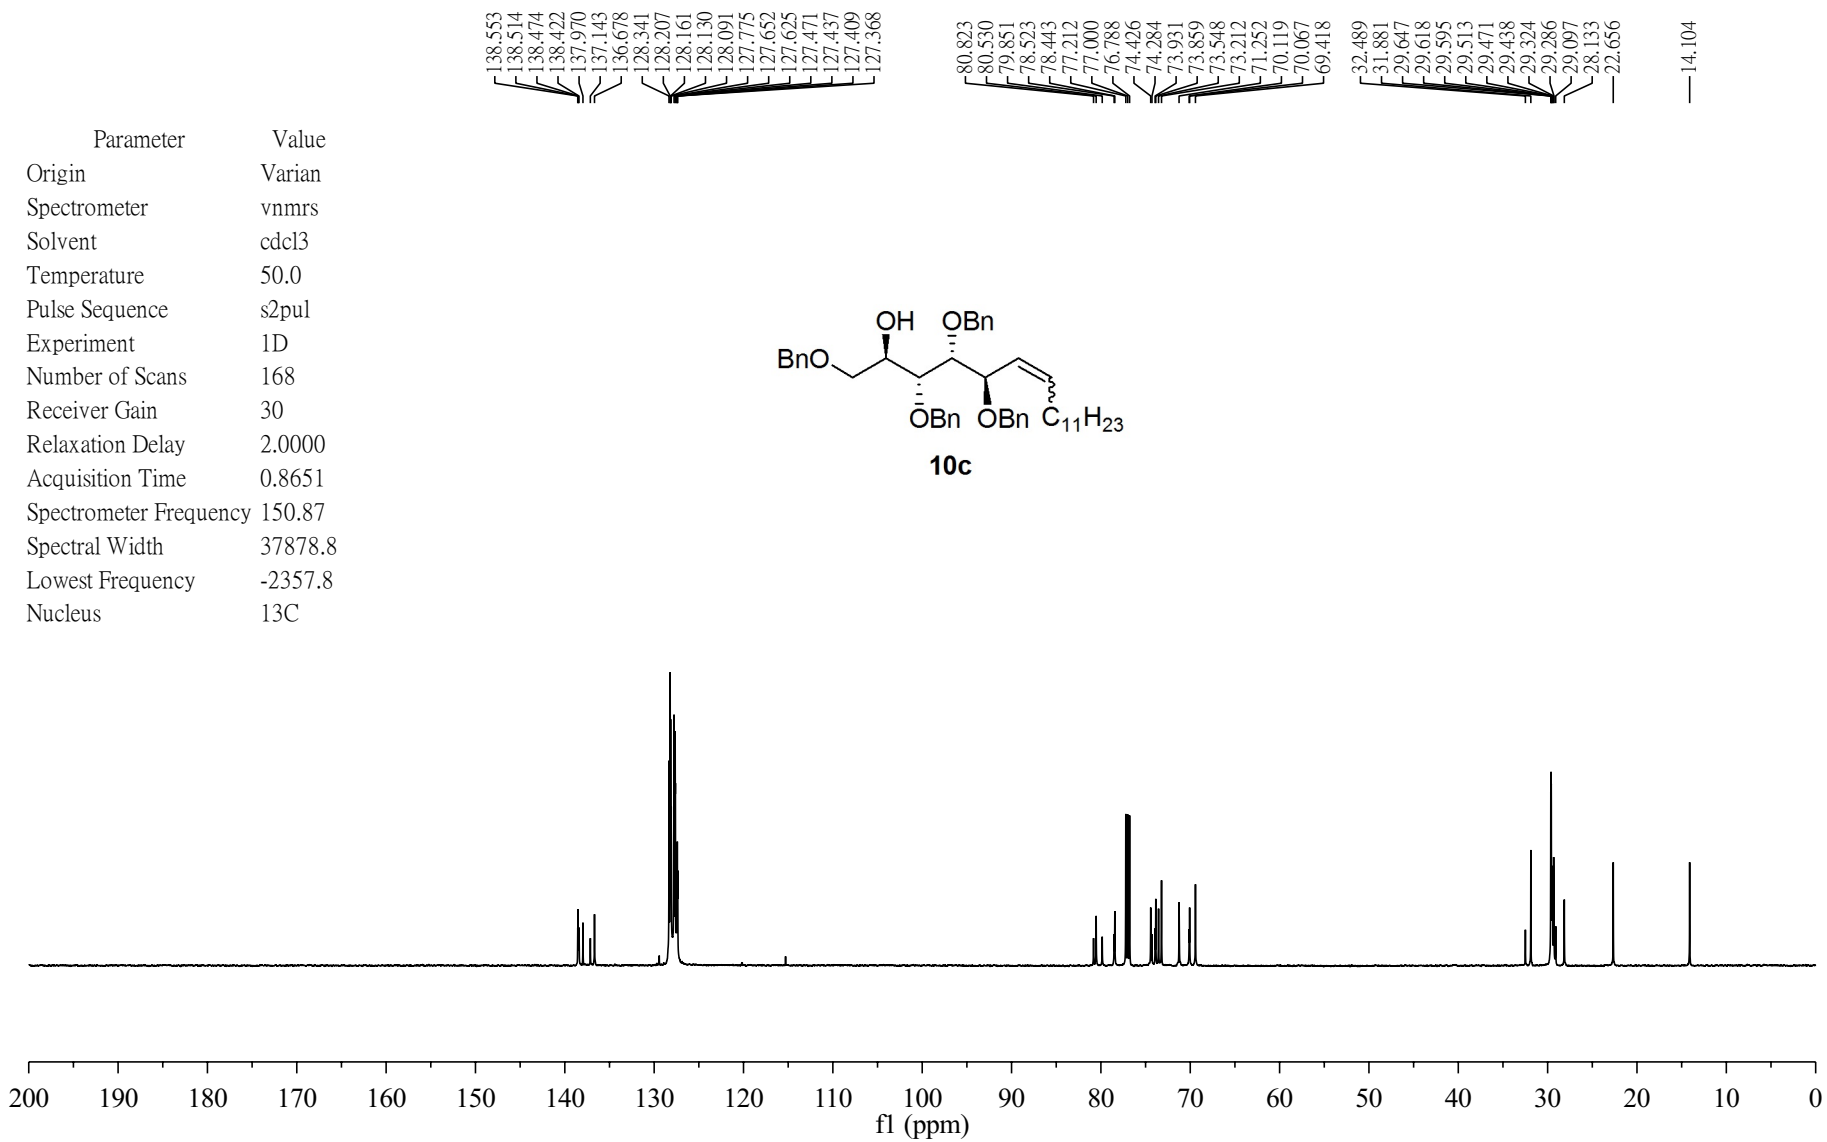

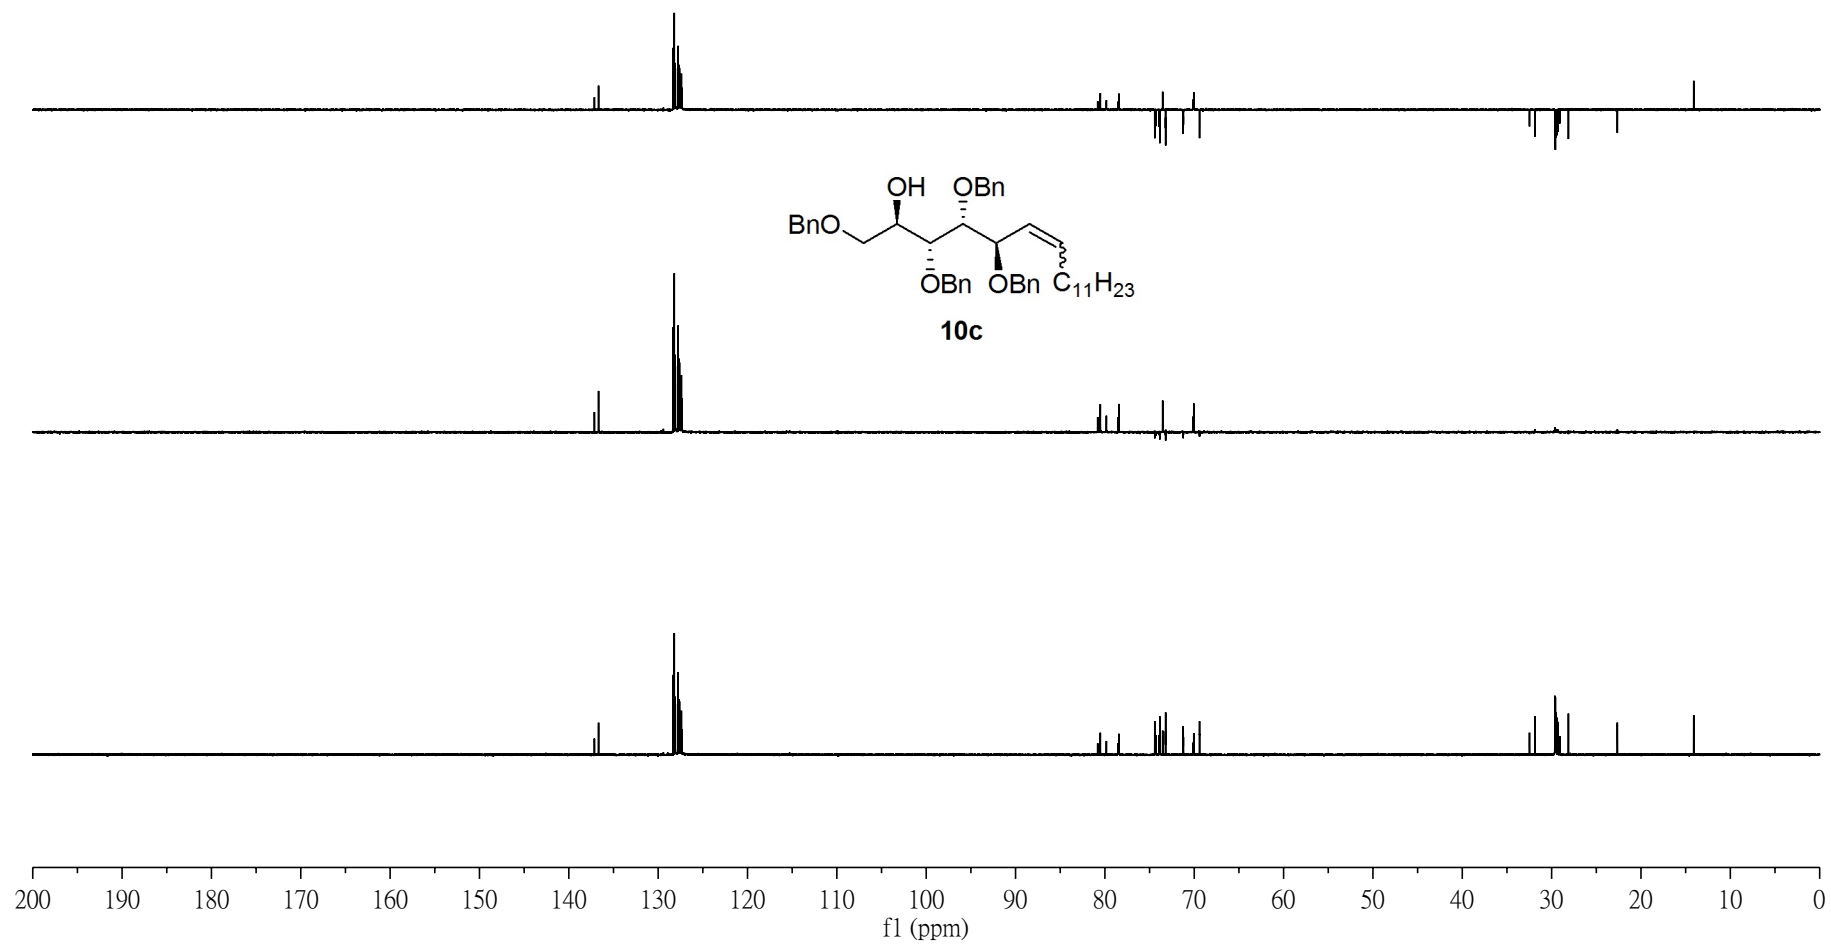

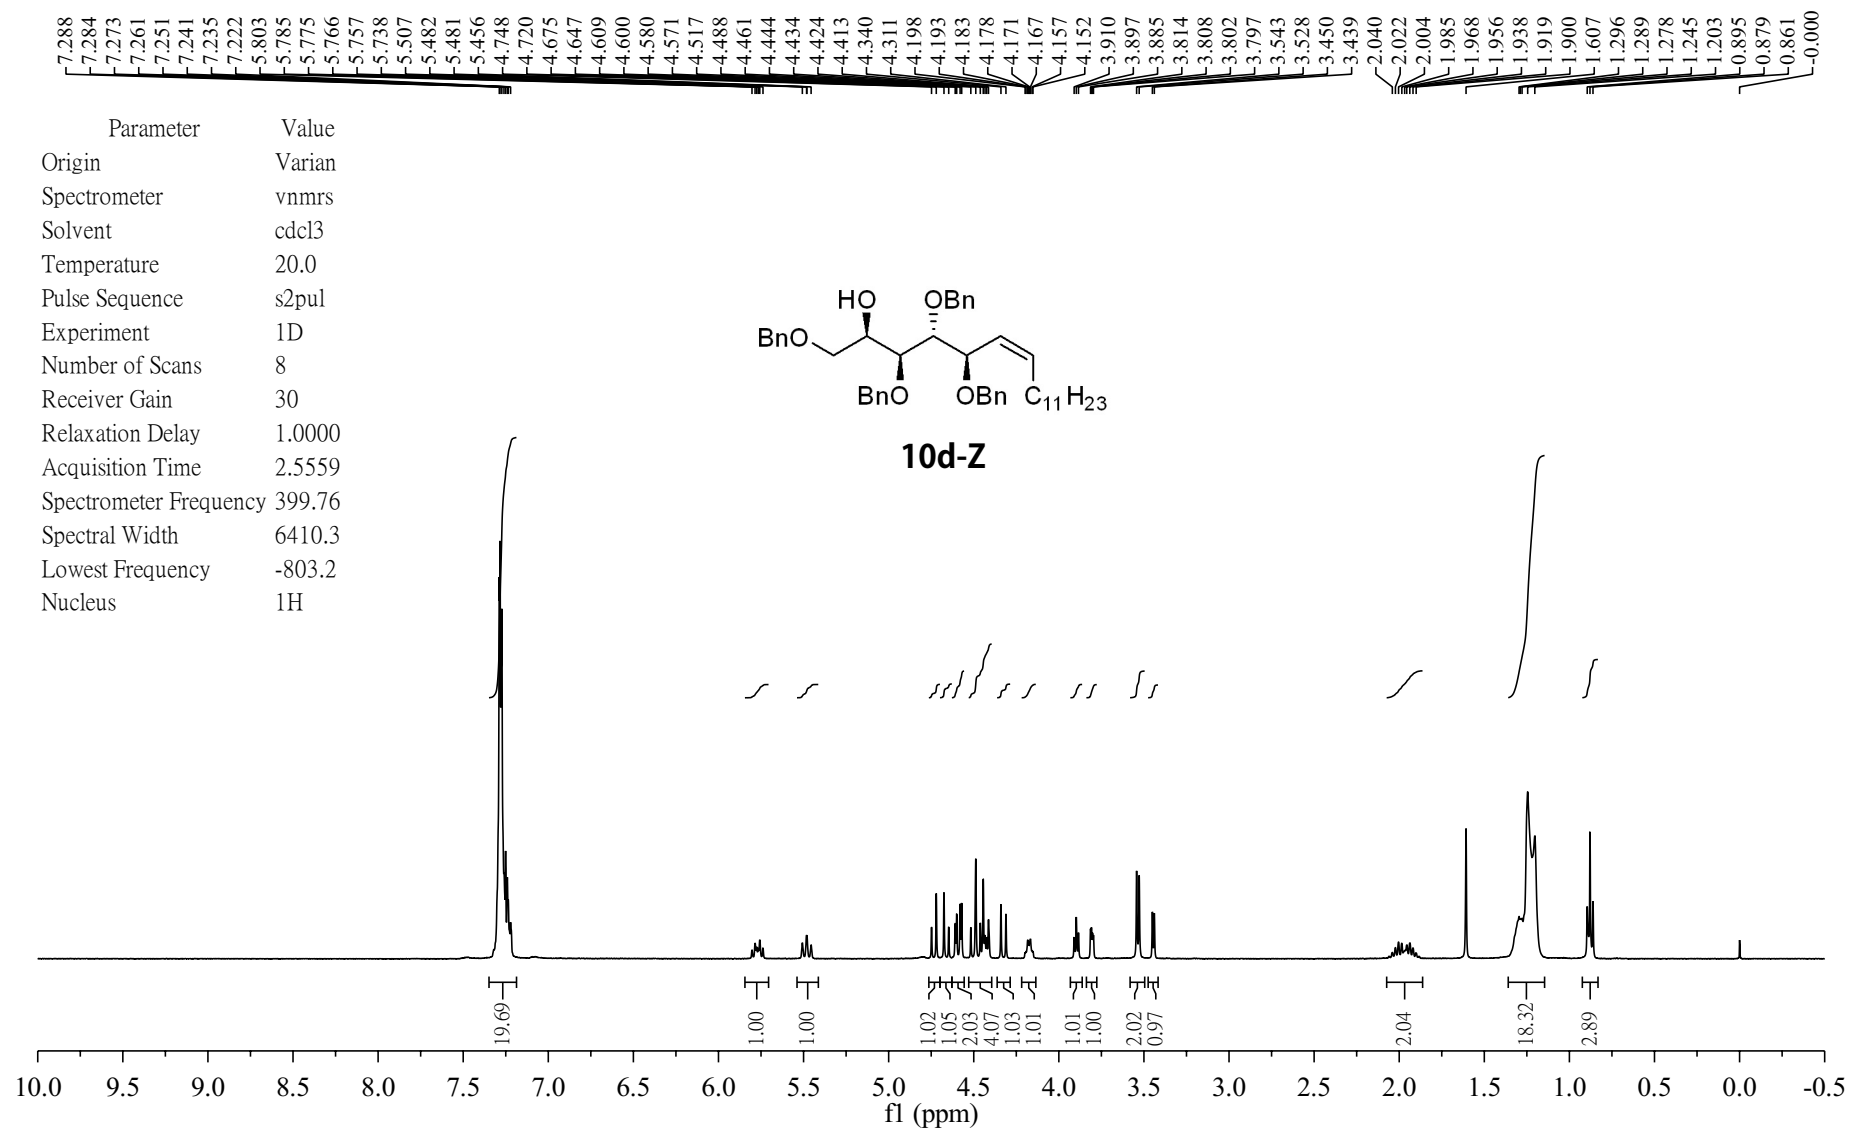

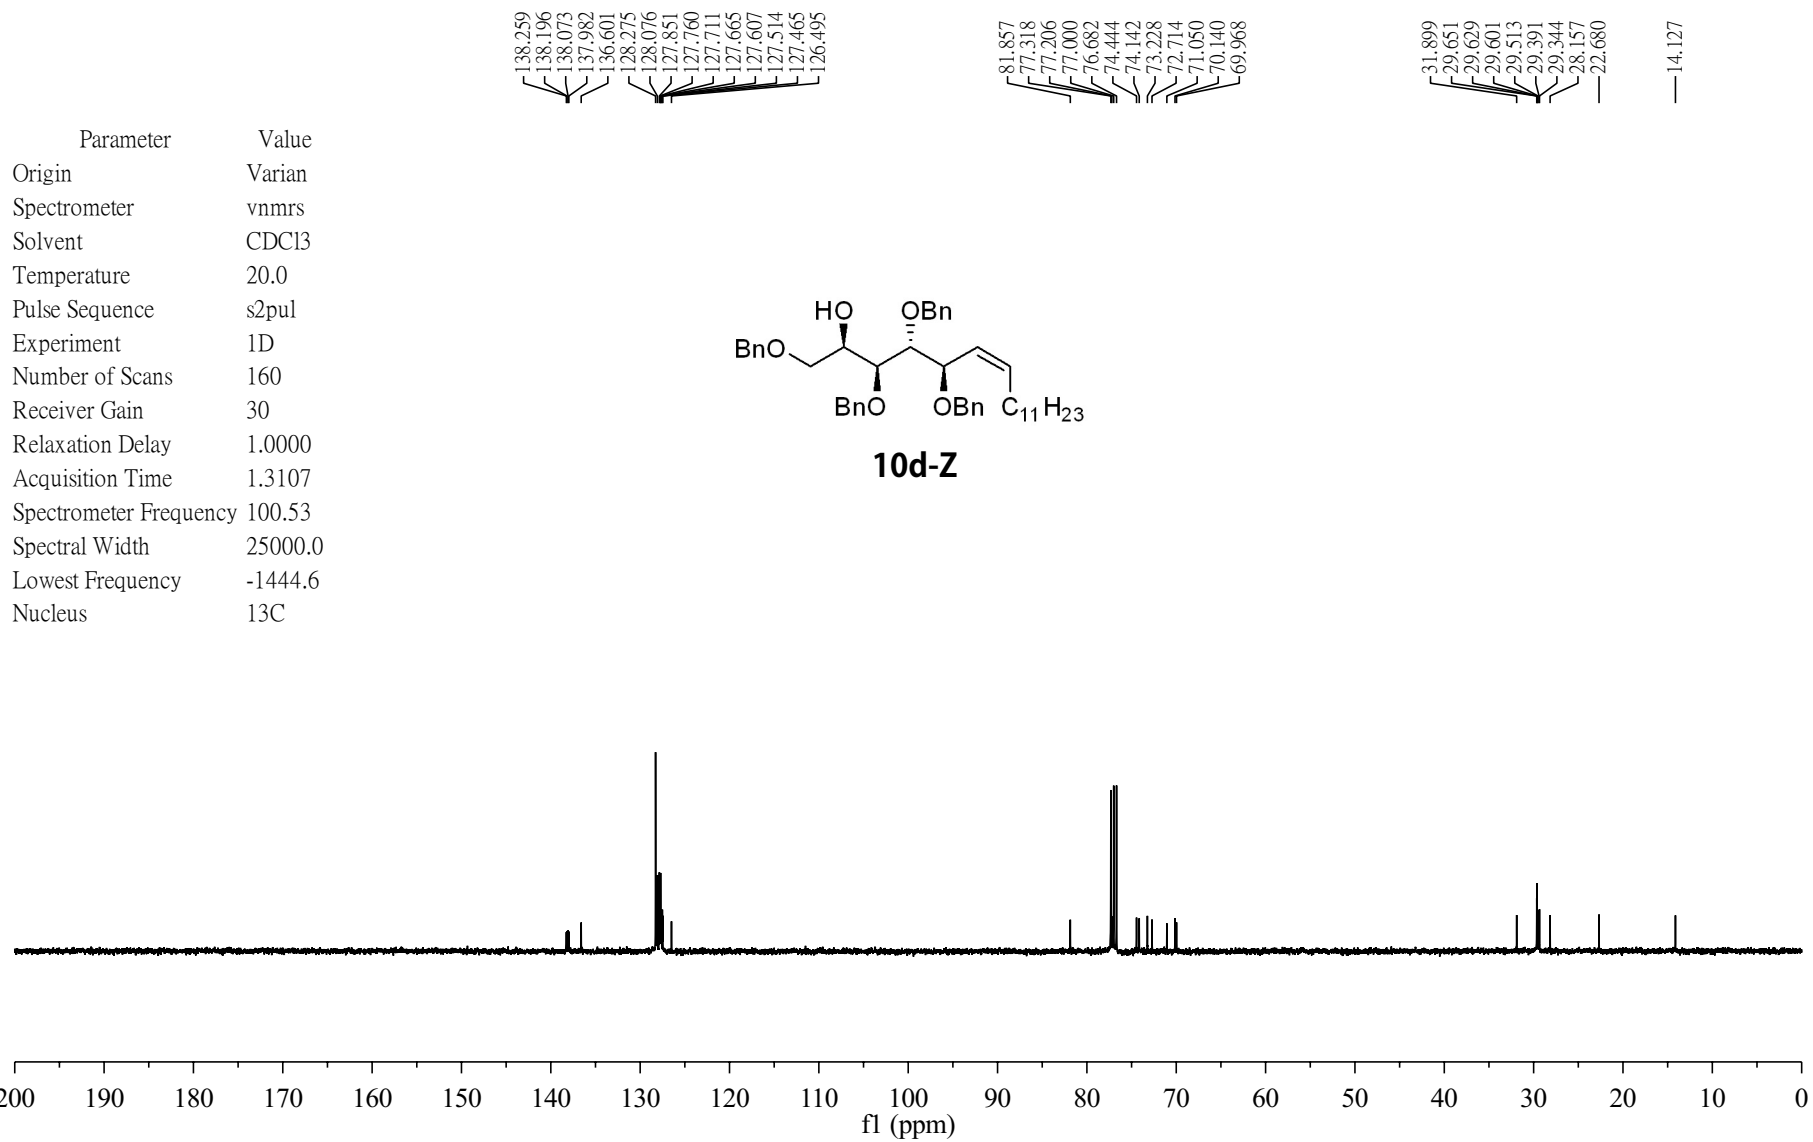



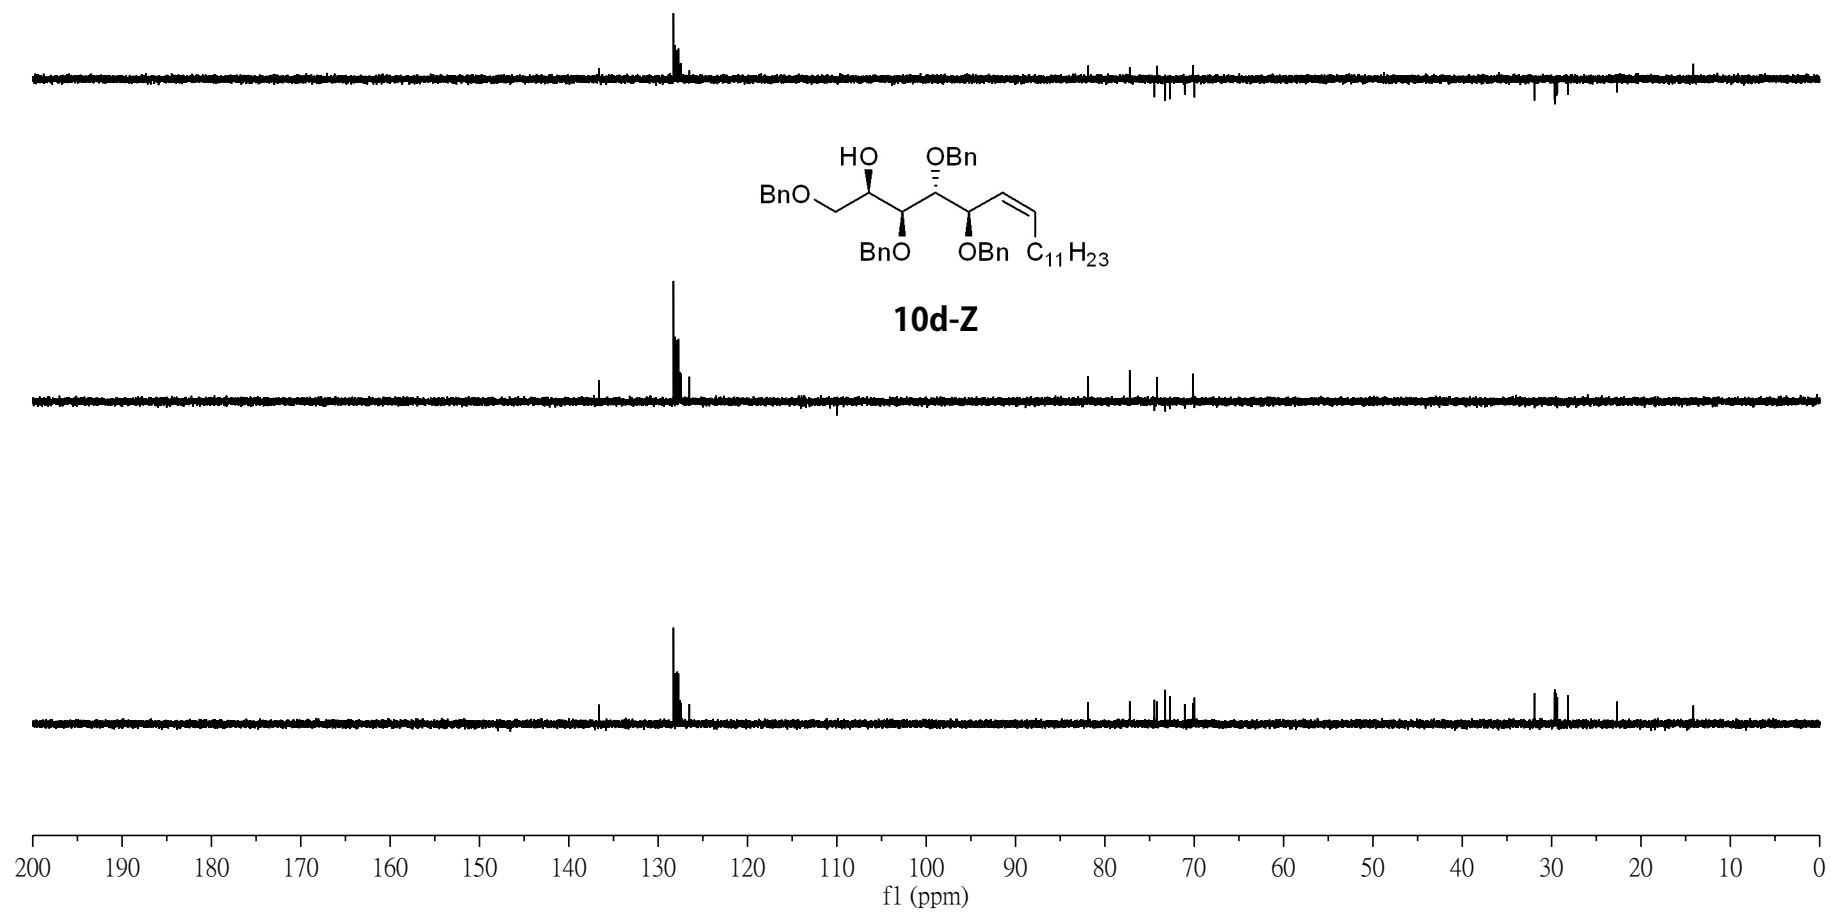

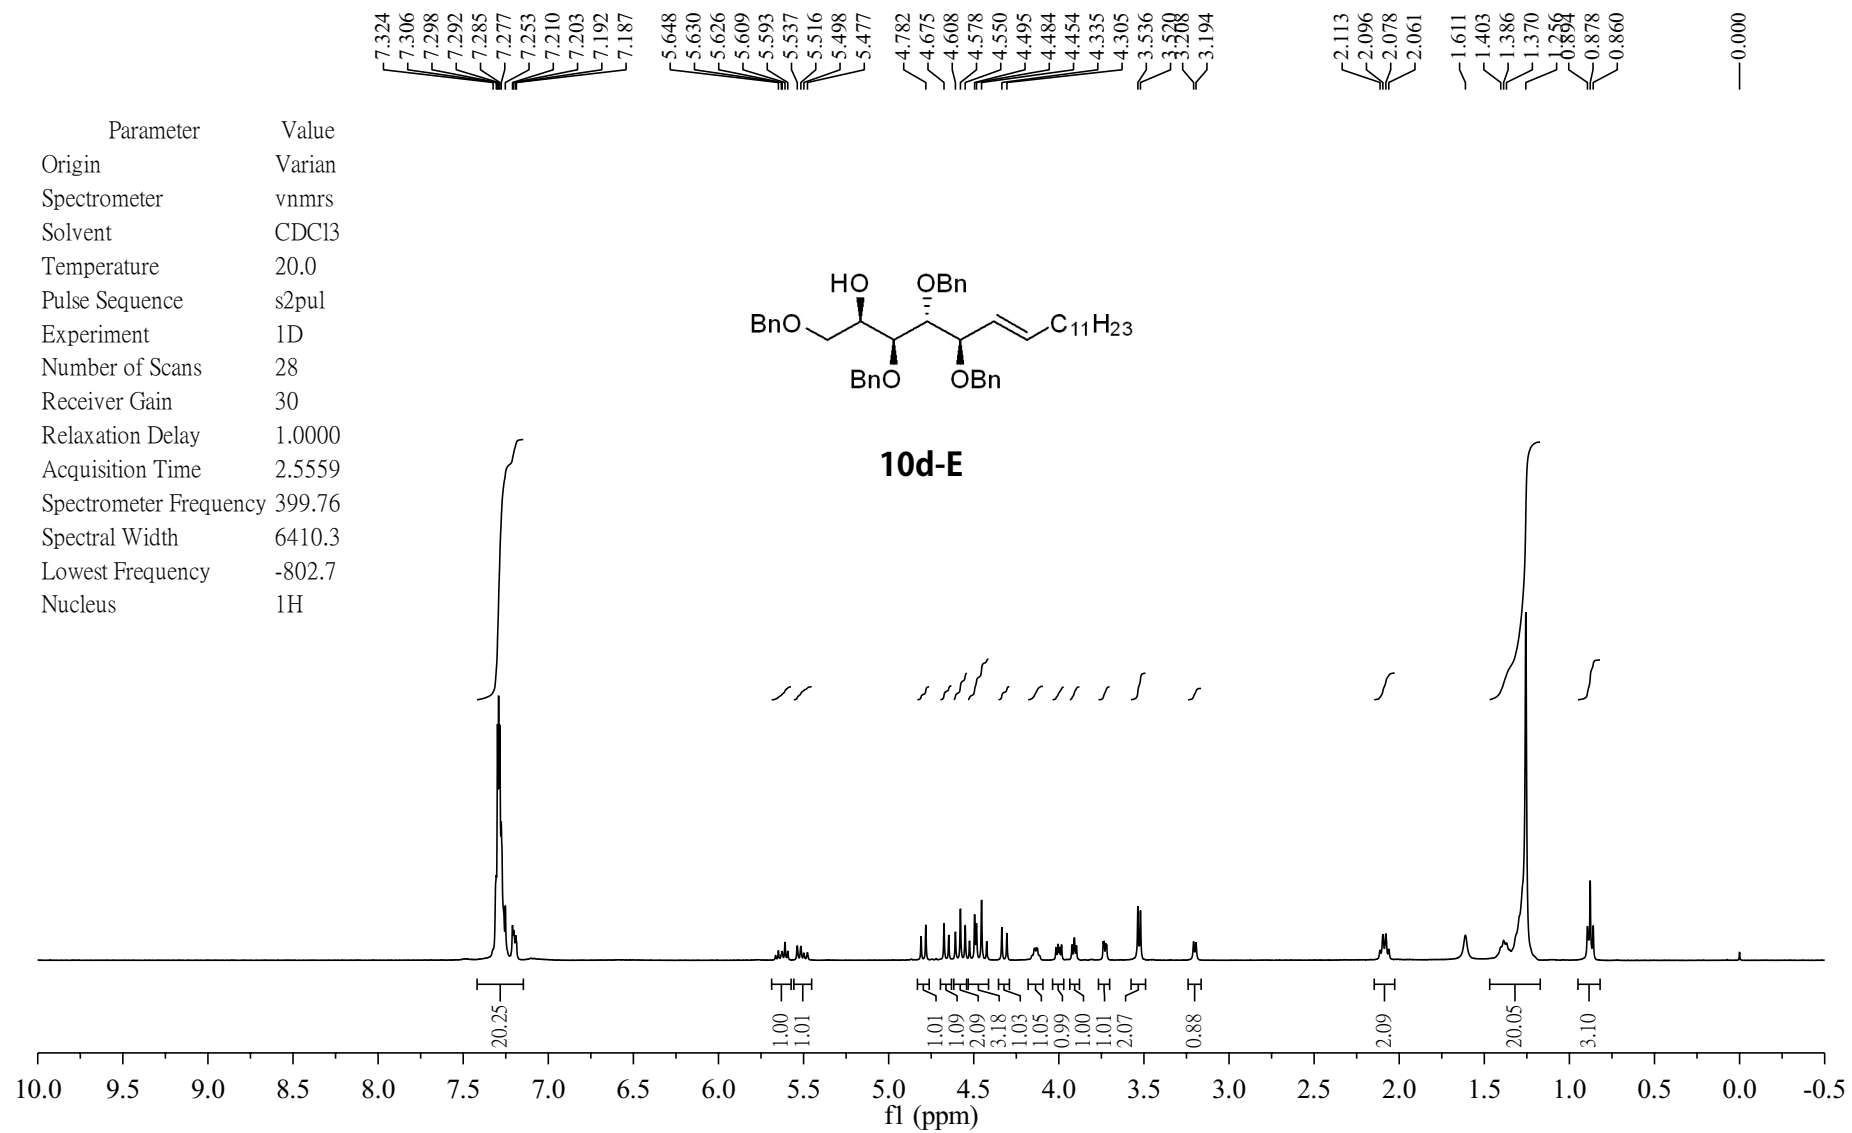

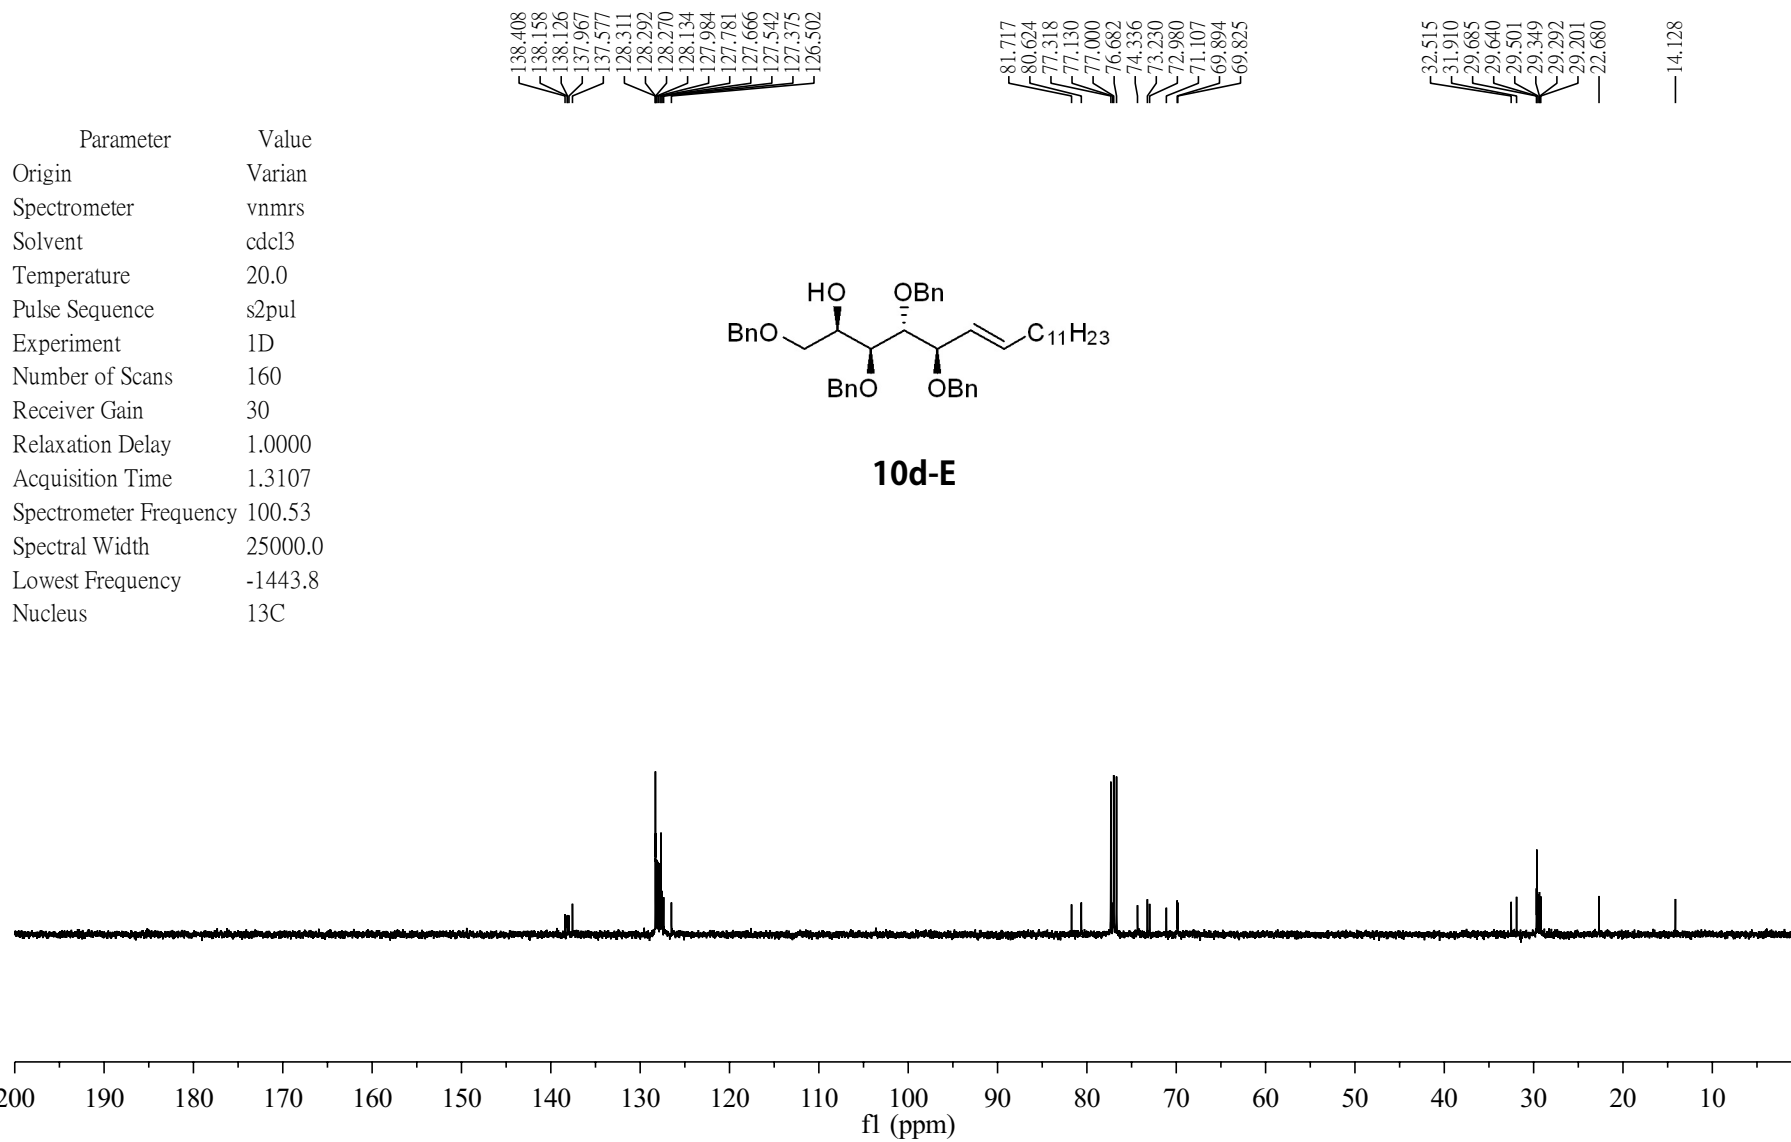

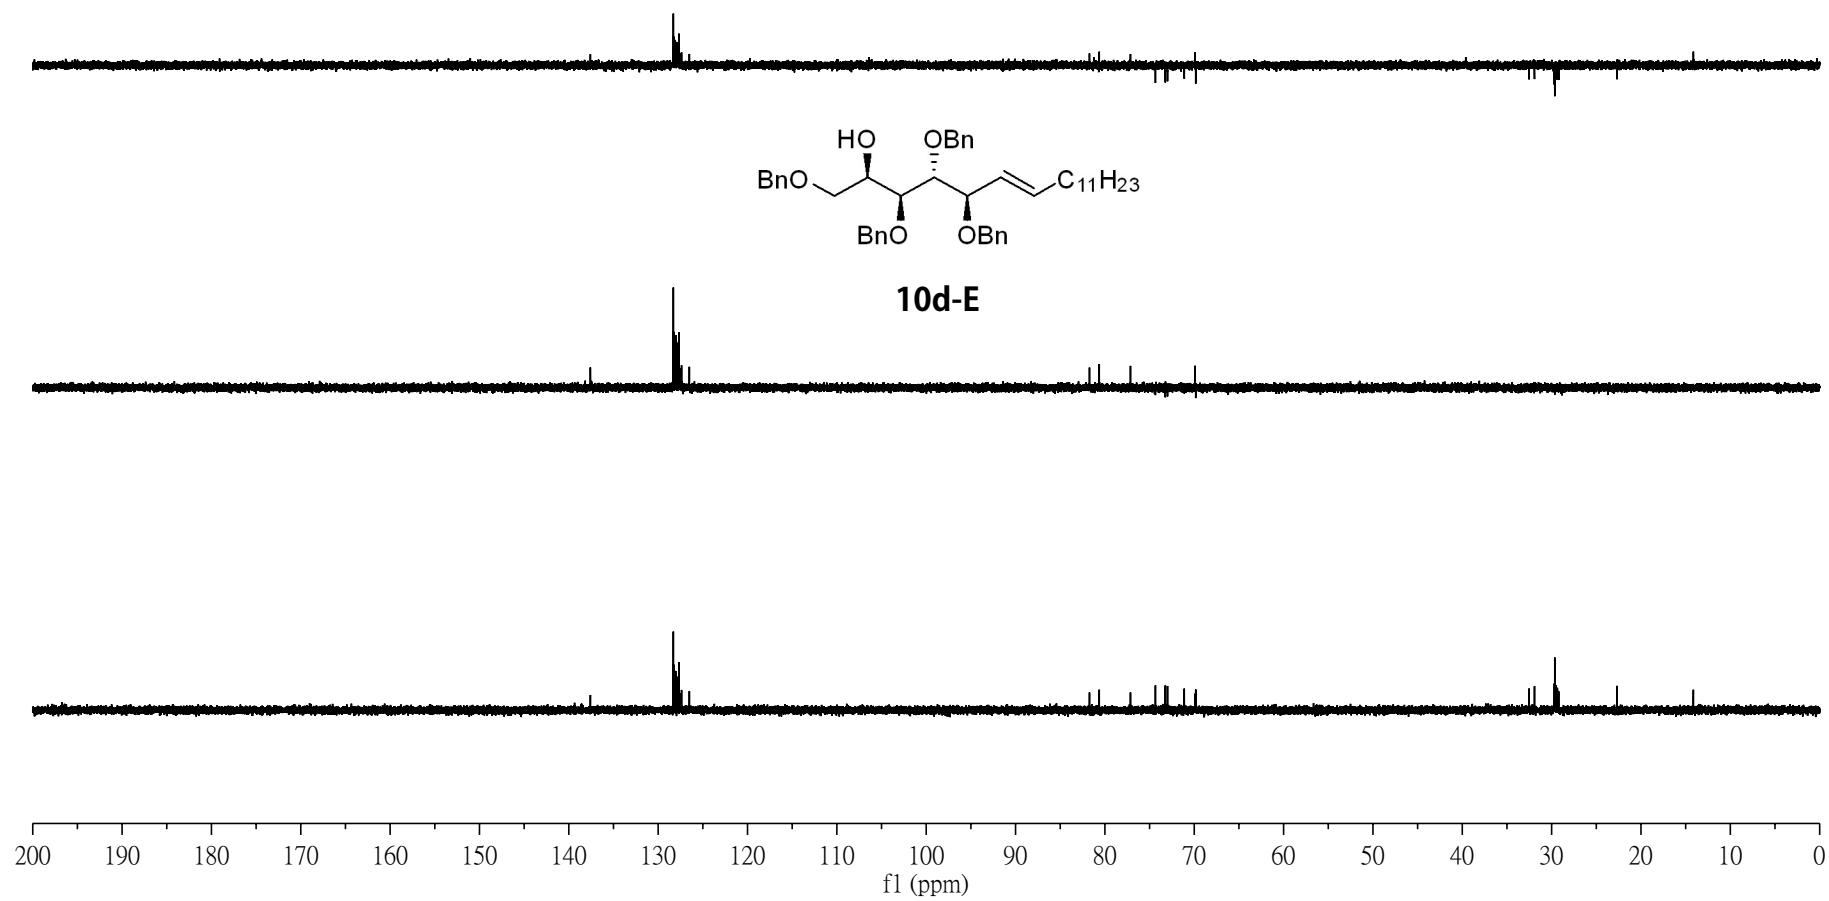

| Parameter                 | Value               |
|---------------------------|---------------------|
| 1 Comment                 | HSL-261             |
| 2 Origin                  | Varian              |
| 3 Spectrometer            | inova               |
| 4 Author                  | vnmr1               |
| 5 Solvent                 | CDCl3               |
| 6 Temperature             | 29.0                |
| 7 Pulse Sequence          | s2pul               |
| 8 Number of Scans         | 64                  |
| 9 Receiver Gain           | 30                  |
| 10 Relaxation Delay       | 1.0000              |
| 11 Pulse Width            | 0.0000              |
| 12 Acquisition Time       | 2.0000              |
| 13 Modification Date      | 2012-08-29T16:43:26 |
| 14 Spectrometer Frequency | 599.94              |
| 15 Spectral Width         | 8000.0              |
| 16 Lowest Frequency       | -500.0              |
| 17 Nucleus                | 1H                  |
| 18 Acquired Size          | 16000               |
| 19 Spectral Size          | 32768               |

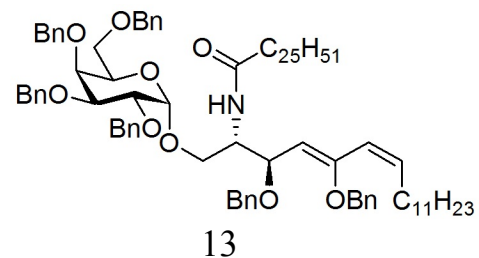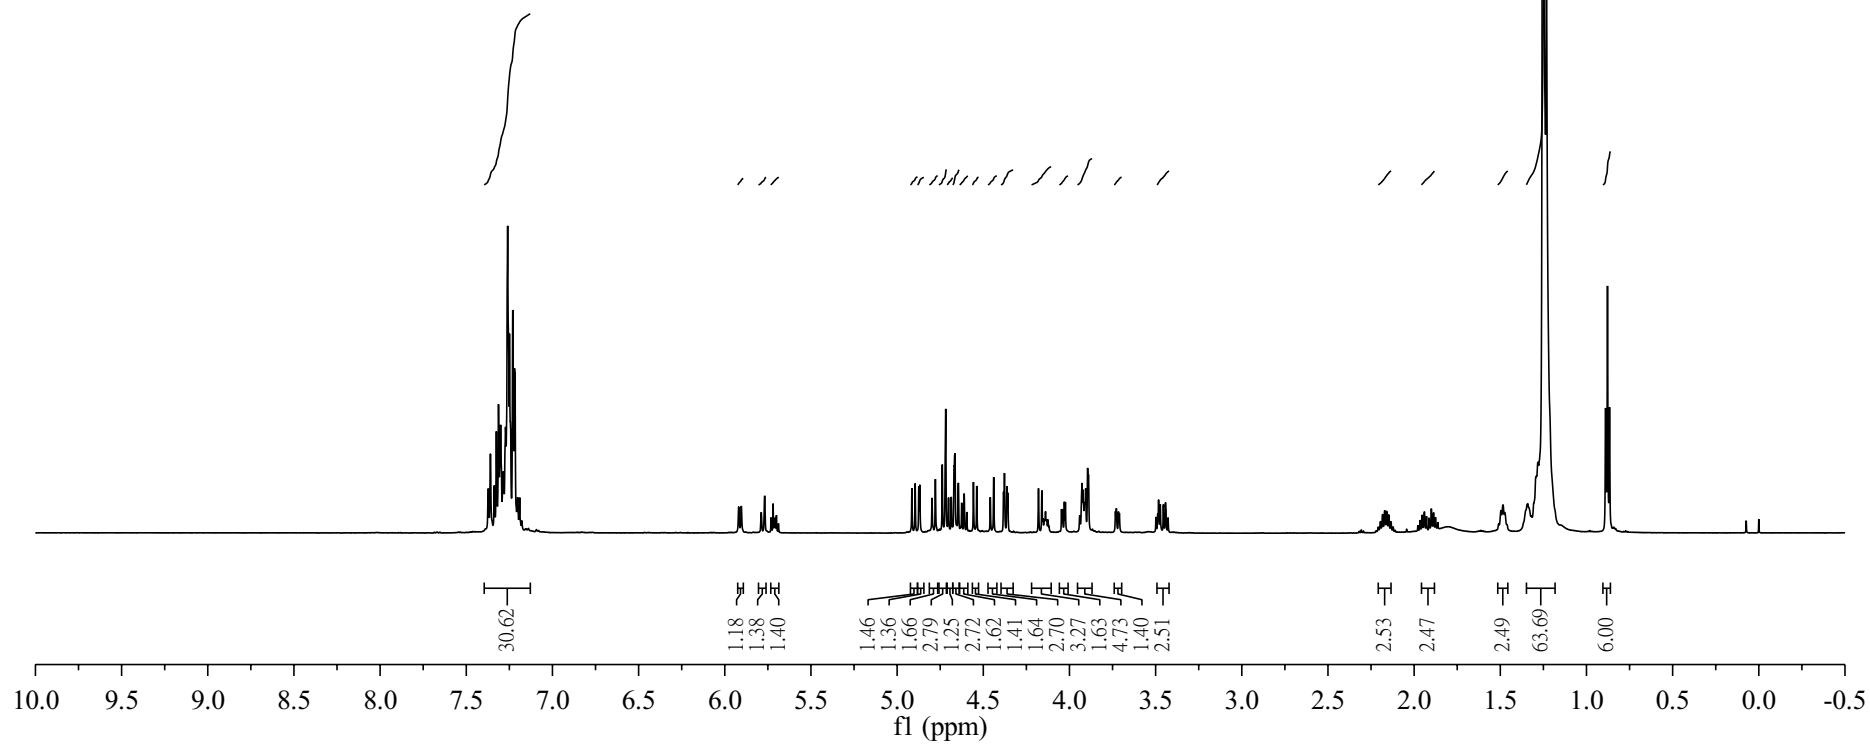

| Parameter                 | Value               |
|---------------------------|---------------------|
| 1 Comment                 | HSL-261             |
| 2 Origin                  | Varian              |
| 3 Spectrometer            | inova               |
| 4 Author                  | vnmr1               |
| 5 Solvent                 | CDC13               |
| 6 Temperature             | 22.0                |
| 7 Pulse Sequence          | s2pul               |
| 8 Number of Scans         | 256                 |
| 9 Receiver Gain           | 58                  |
| 10 Relaxation Delay       | 0.5000              |
| 11 Pulse Width            | 0.0000              |
| 12 Acquisition Time       | 0.9997              |
| 13 Modification Date      | 2012-08-29T16:43:22 |
| 14 Spectrometer Frequency | 150.87              |
| 15 Spectral Width         | 40000.0             |
| 16 Lowest Frequency       | -4043.5             |
| 17 Nucleus                | $^{13}\text{C}$     |
| 18 Acquired Size          | 39987               |
| 19 Spectral Size          | 131072              |

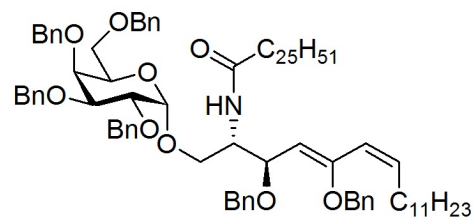

13

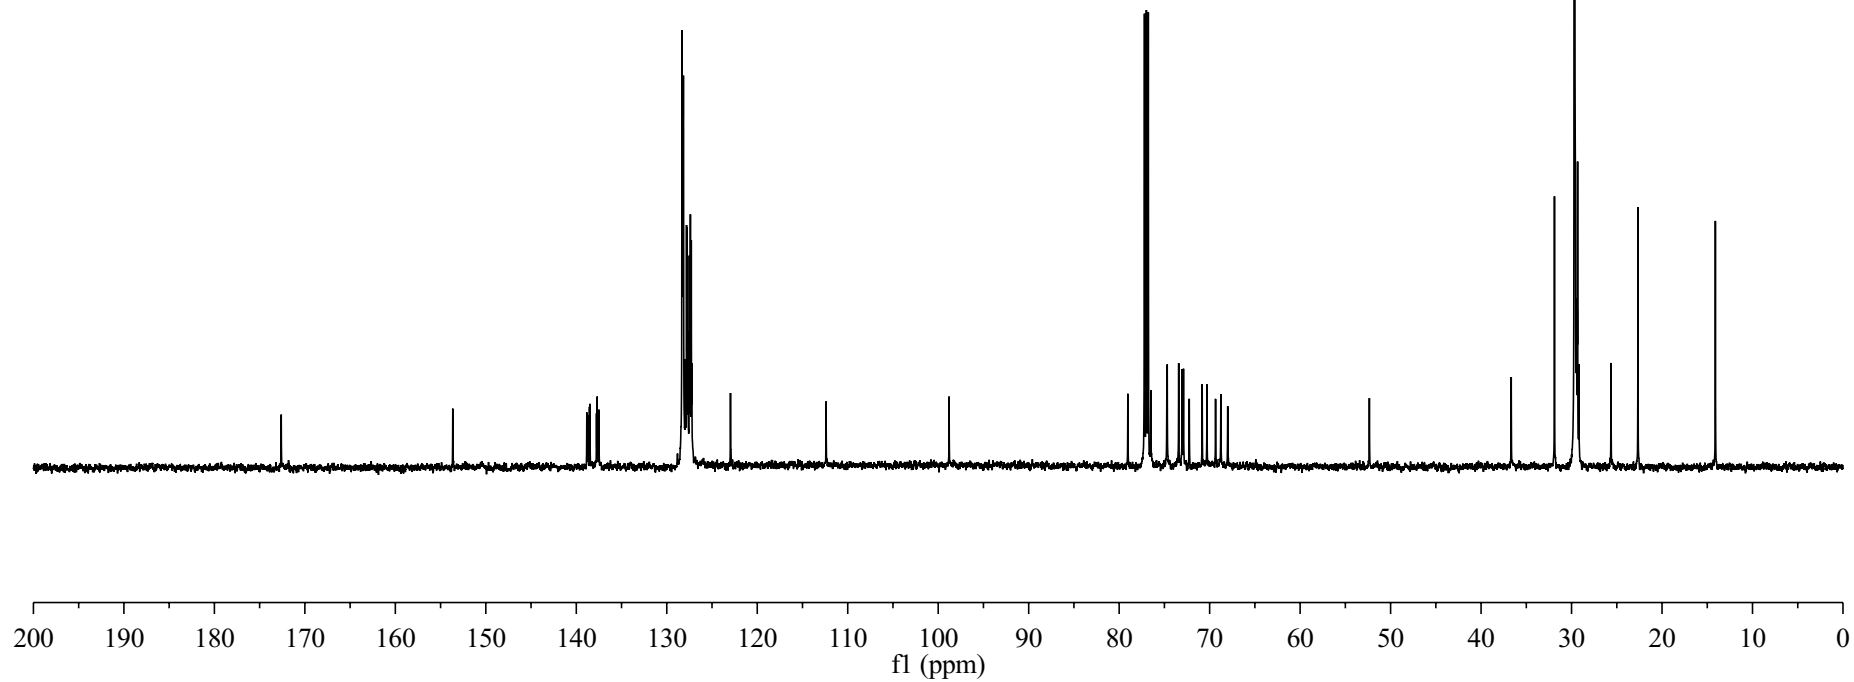



| Parameter              | Value (f2, f1)   |
|------------------------|------------------|
| Origin                 | Varian           |
| Spectrometer           | inova            |
| Solvent                | CDCl3            |
| Temperature            | 29.0             |
| Pulse Sequence         | gCOSY            |
| Experiment             | 2D-COSY          |
| Number of Scans        | 16               |
| Receiver Gain          | 30               |
| Relaxation Delay       | 1.0000           |
| Acquisition Time       | 0.1280           |
| Spectrometer Frequency | (599.94, 599.94) |
| Spectral Width         | (8000.0, 8000.0) |
| Lowest Frequency       | (-500.3, -500.6) |
| Nucleus                | (1H, 1H)         |
| Acquired Size          | (1024, 256)      |
| Spectral Size          | (1024, 1024)     |

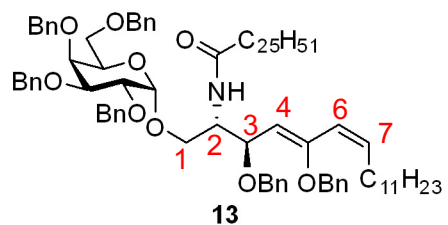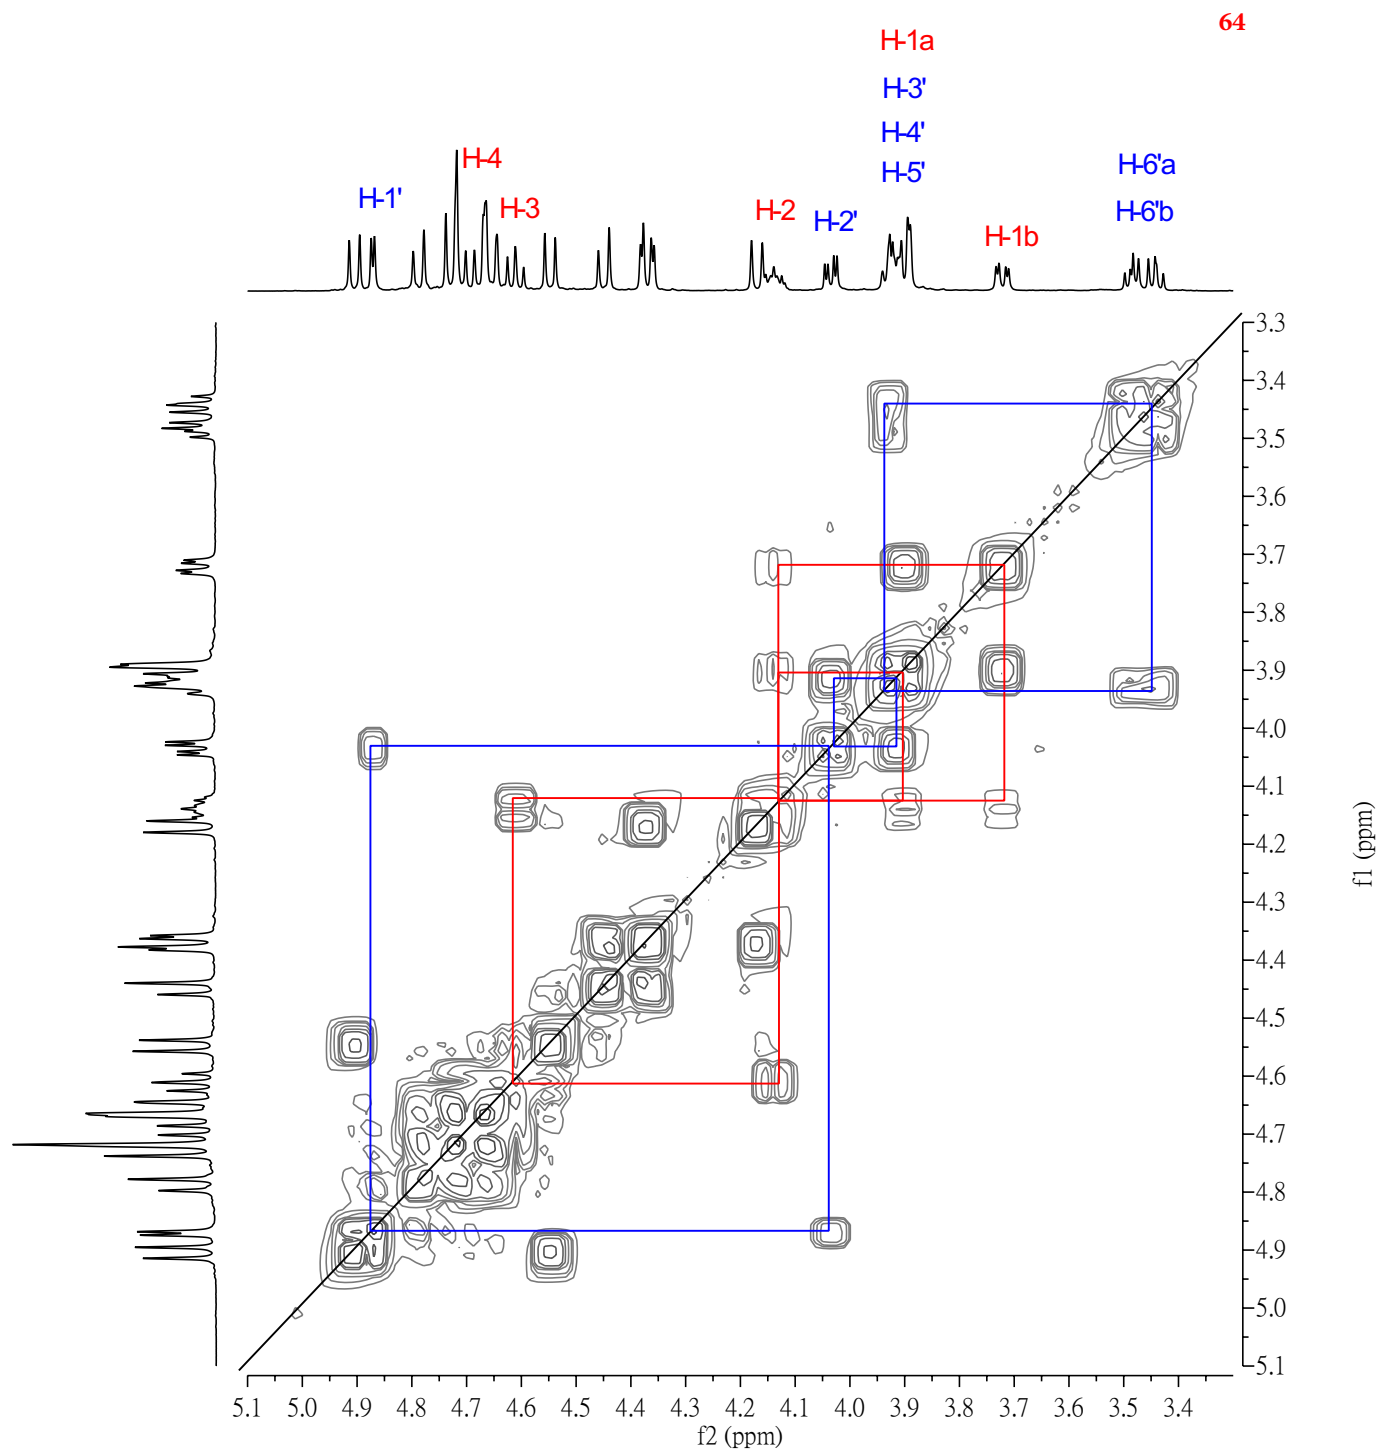



| Parameter              | Value (f2, f1)    |
|------------------------|-------------------|
| Origin                 | Varian            |
| Spectrometer           | inova             |
| Solvent                | CDC13             |
| Temperature            | 29.0              |
| Pulse Sequence         | gHSQC             |
| Experiment             | 2D-HSQC           |
| Number of Scans        | 16                |
| Receiver Gain          | 50                |
| Relaxation Delay       | 1.0000            |
| Acquisition Time       | 0.1280            |
| Spectrometer Frequency | (599.94, 150.86)  |
| Spectral Width         | (8000.0, 25641.0) |
| Lowest Frequency       | (-504.6, -1545.3) |
| Nucleus                | (1H, 13C)         |
| Acquired Size          | (1024, 256)       |
| Spectral Size          | (1024, 1024)      |

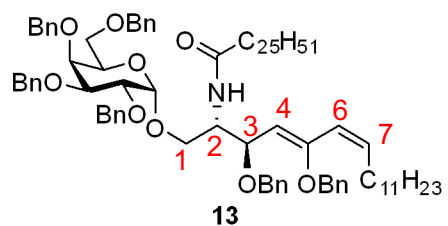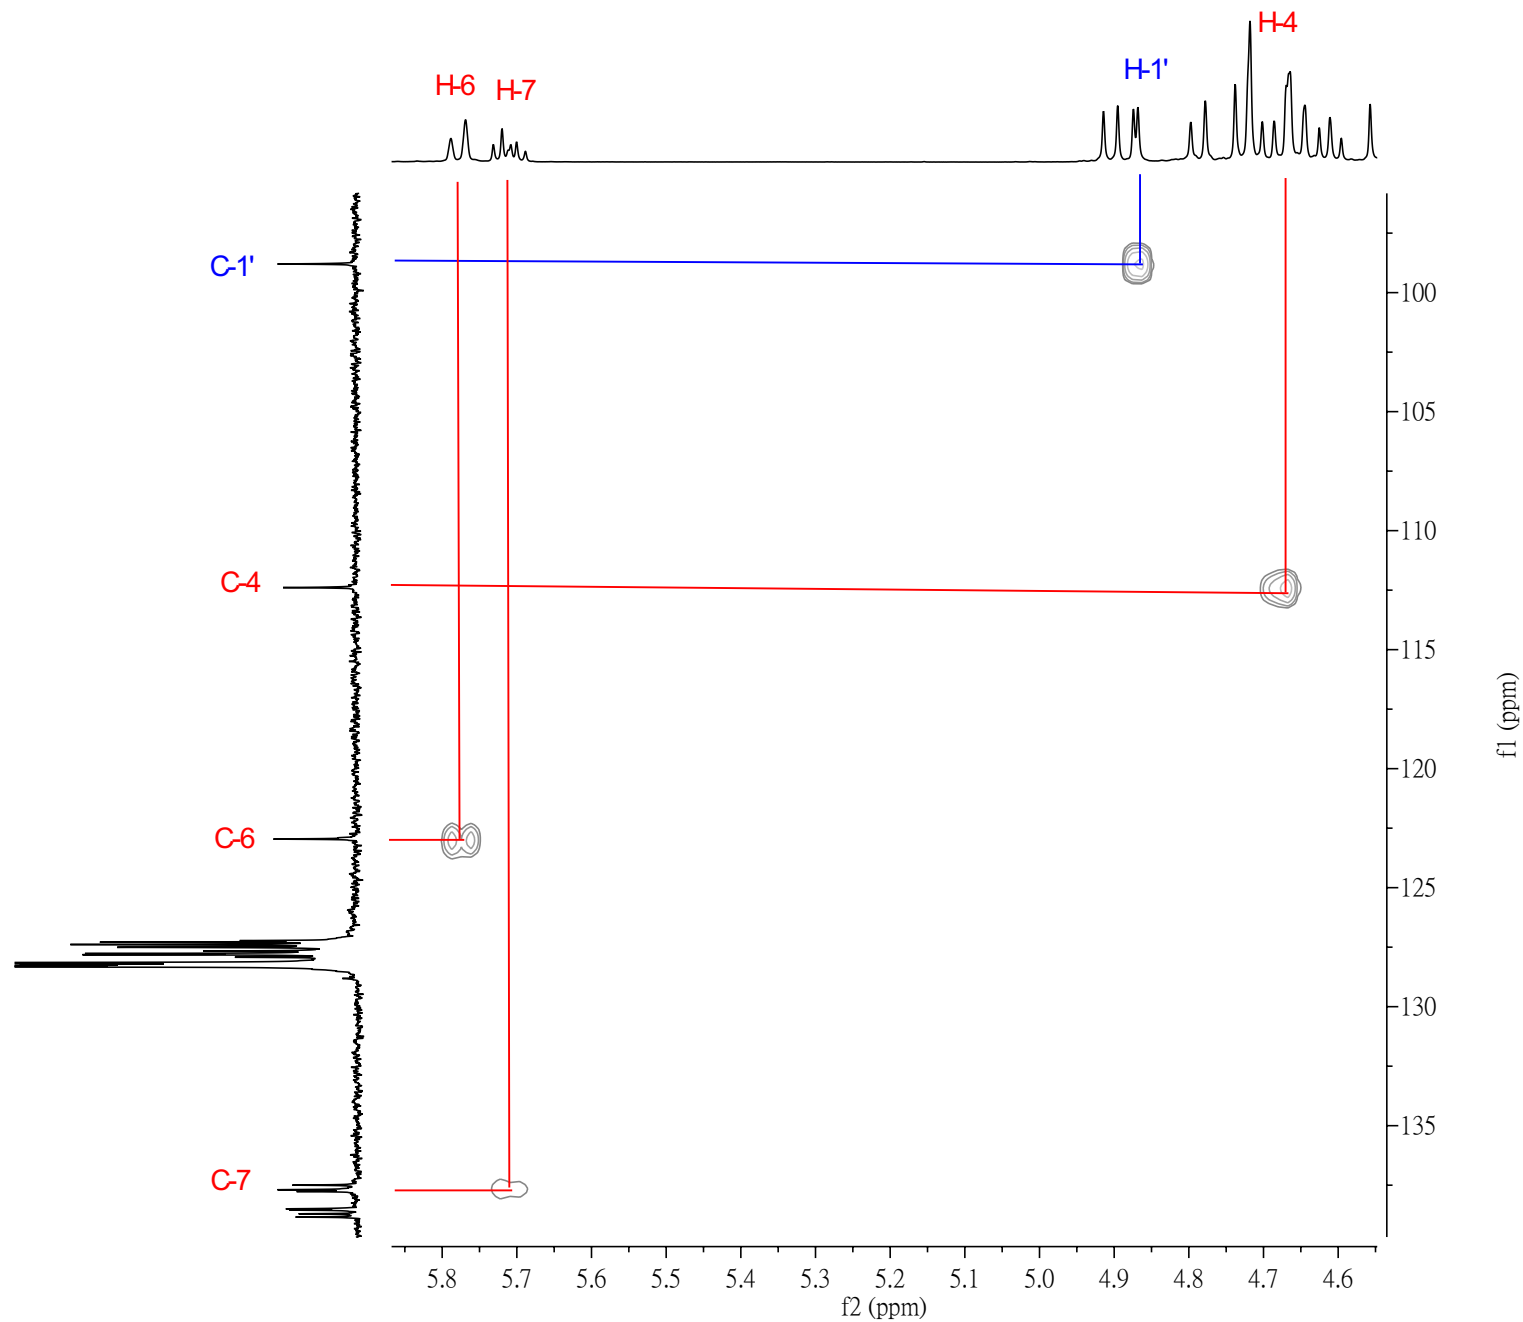

| Parameter                 | Value               |
|---------------------------|---------------------|
| 1 Comment                 | HSL-262             |
| 2 Origin                  | Varian              |
| 3 Spectrometer            | nmrs                |
| 4 Author                  |                     |
| 5 Solvent                 | pyridine            |
| 6 Temperature             | 25.0                |
| 7 Pulse Sequence          | s2pul               |
| 8 Number of Scans         | 84                  |
| 9 Receiver Gain           | 30                  |
| 10 Relaxation Delay       | 1.0000              |
| 11 Pulse Width            | 0.0000              |
| 12 Acquisition Time       | 2.5559              |
| 13 Modification Date      | 2013-01-03T13:19:24 |
| 14 Spectrometer Frequency | 399.76              |
| 15 Spectral Width         | 6410.3              |
| 16 Lowest Frequency       | -927.4              |
| 17 Nucleus                | <sup>1</sup> H      |
| 18 Acquired Size          | 16384               |
| 19 Spectral Size          | 32768               |

5.546 5.394 5.384 4.690 4.681 4.665 4.656 4.564 4.556 4.501 4.493 4.477 4.468 4.455 4.406 4.397 2.706 2.687 2.669 2.464 2.445 2.445 2.427 2.391 2.387 1.826 1.590 1.360 1.342 1.298 1.237 0.867 0.856 0.850 0.839 0.833

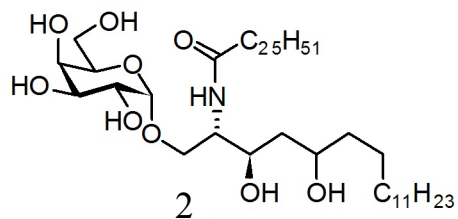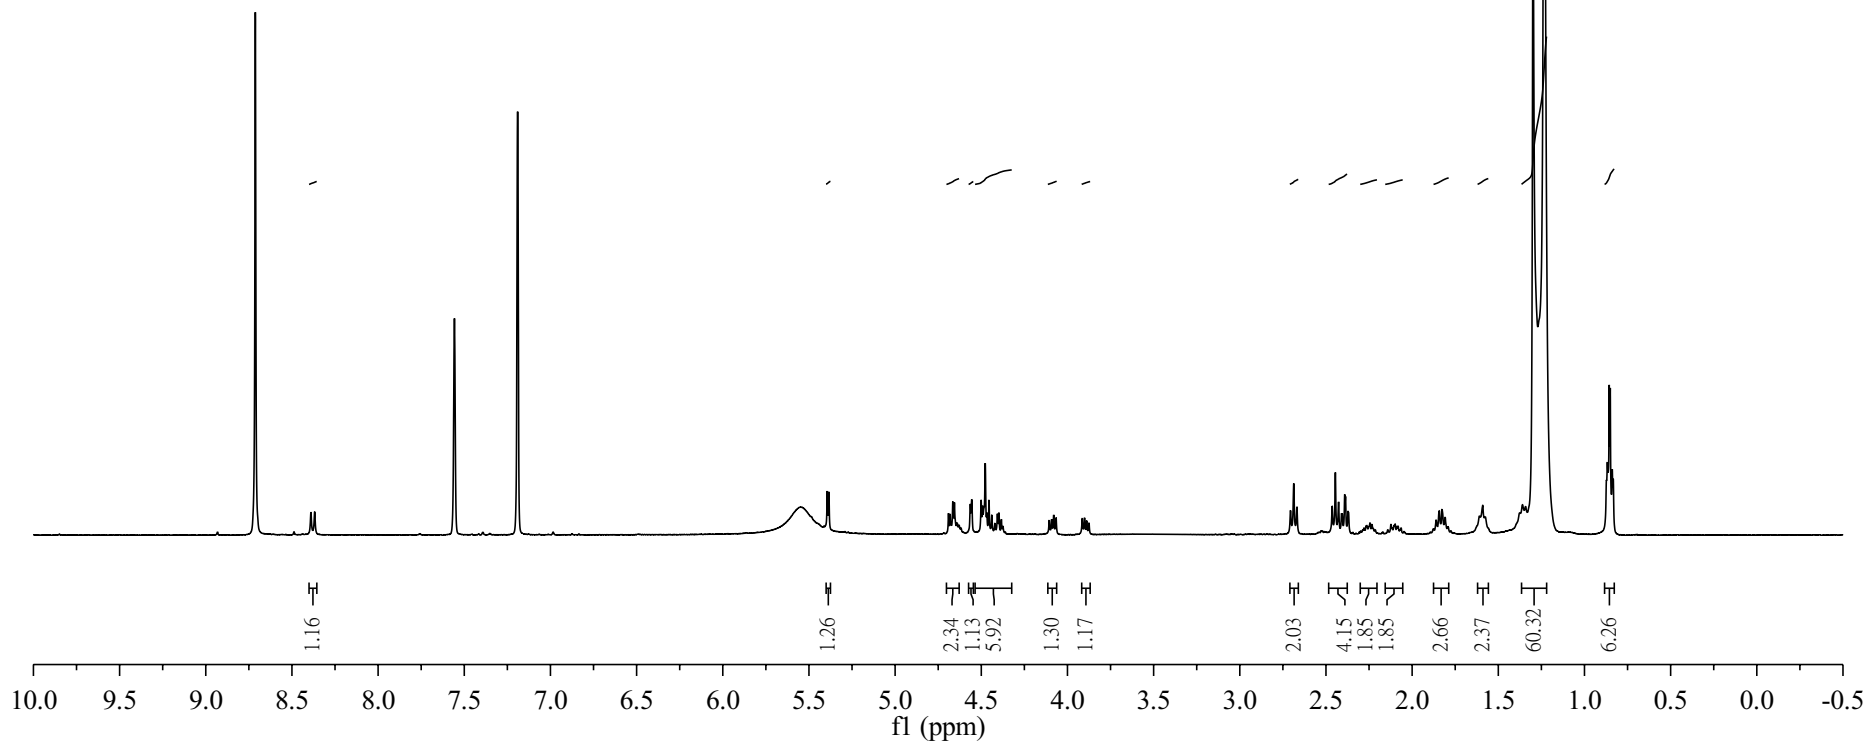

HSL-262\_100

exp50 s2pu1

|                     |                |            |          |
|---------------------|----------------|------------|----------|
| SAMPLE              |                | DEC. & VT  |          |
| date                | Mar 27 2013    | dfrq       | 599.936  |
| solvent             | pyridine       | dn         | H1       |
| file                | /export/home/~ | dpwr       | 41       |
| data2/Lo/HSL-262_1~ |                | dof        | 0        |
| 00-C13.fid          |                | dm         | nyy      |
| ACQUISITION         |                | dmm        | w        |
| sfrq                | 150.869        | dmf        | 14925    |
| tn                  | C13            | dseq       |          |
| at                  | 1.000          | dres       | 1.0      |
| np                  | 79974          | homo       | n        |
| sw                  | 40000.0        | temp       | 100.0    |
| fb                  | not used       | DEC2       |          |
| bs                  | 16             | dfrq2      | 0        |
| tpwr                | 60             | dn2        |          |
| pw                  | 3.8            | dpwr2      | 1        |
| d1                  | 0.500          | dof2       | 0        |
| d2                  | 1.500          | dm2        | n        |
| tof                 | 2500.0         | dmm2       | c        |
| nt                  | 20000          | dmf2       | 10000    |
| ct                  | 2240           | dseq2      |          |
| alock               | n              | dres2      | 1.0      |
| gain                | 58             | homo2      | n        |
| FLAGS               |                | PROCESSING |          |
| il                  | n              | lb         | 3.00     |
| in                  | n              | wtfile     |          |
| dp                  | y              | proc       | ft       |
| hs                  | nn             | fn         | not used |
| DISPLAY             |                | math       | f        |
| sp                  | -1508.8        |            |          |
| wp                  | 34696.0        | werr       |          |
| vs                  | 1241           | wexp       |          |
| sc                  | 0              | wbs        |          |
| wc                  | 250            | wnt        |          |
| hzmm                | 138.78         |            |          |
| is                  | 500.00         |            |          |
| rfl                 | 22418.8        |            |          |
| rfp                 | 18630.3        |            |          |
| th                  | 101            |            |          |
| ins                 | 100.000        |            |          |
| nm                  | cdc            | ph         |          |

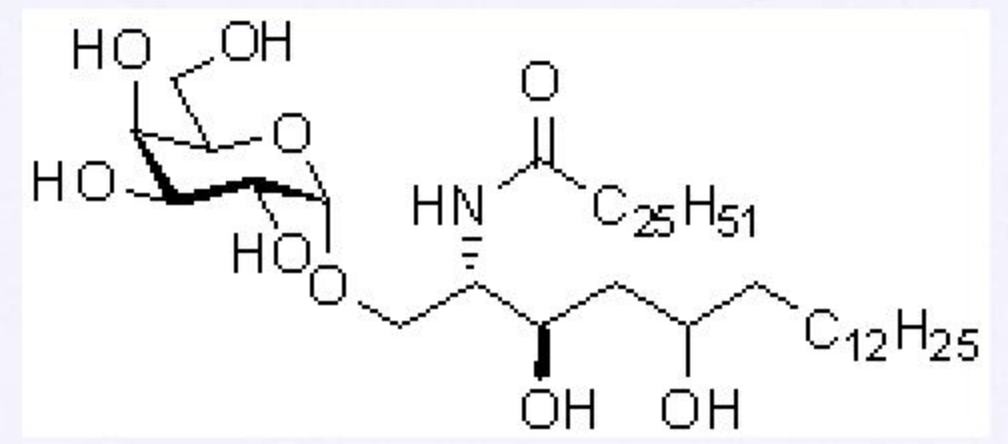

2

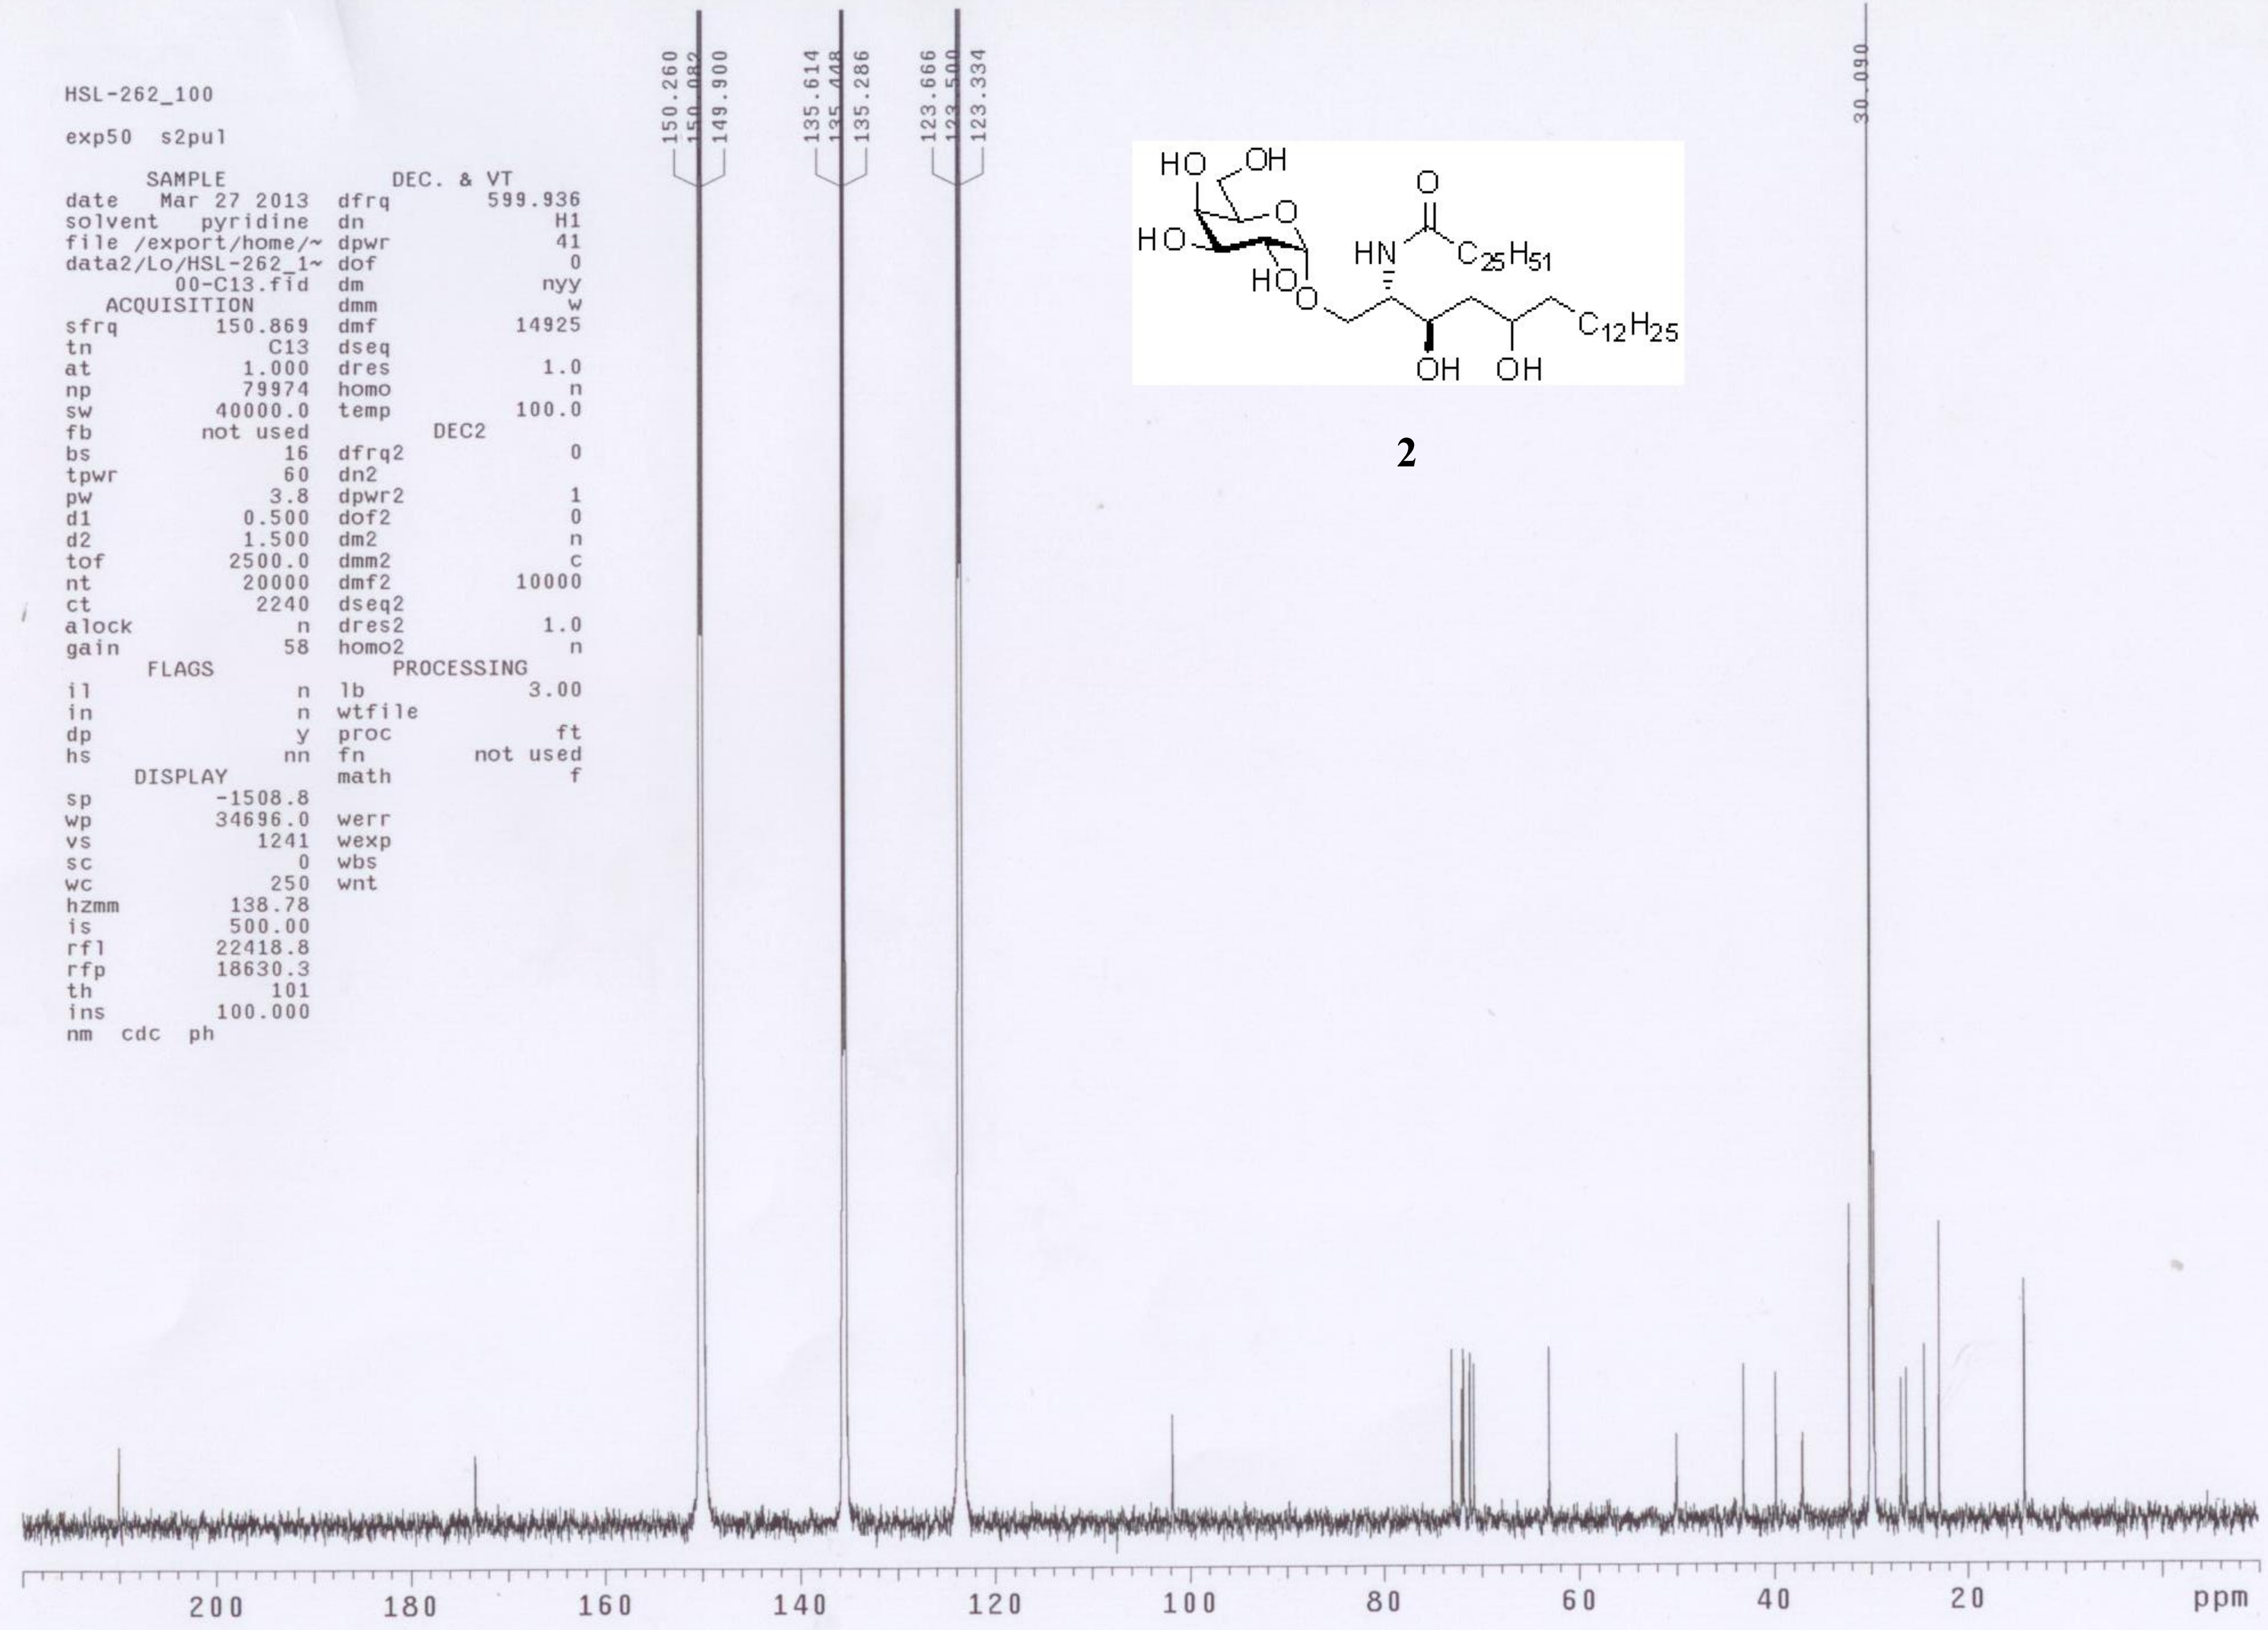

150.260  
150.082  
149.900

135.614  
135.448  
135.286

123.666  
123.500  
123.334

30.090

200 180 160 140 120 100 80 60 40 20 ppm

HSL-262\_100

Pulse Sequence: DEPT

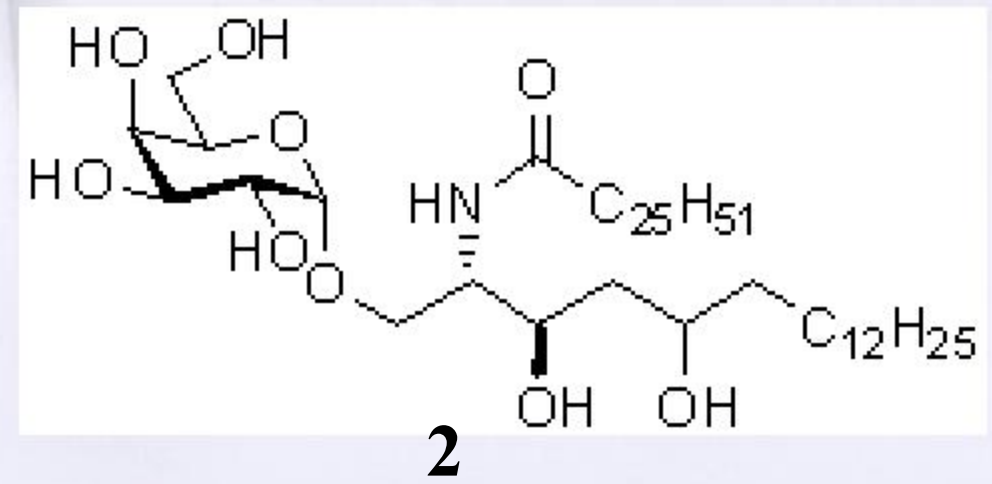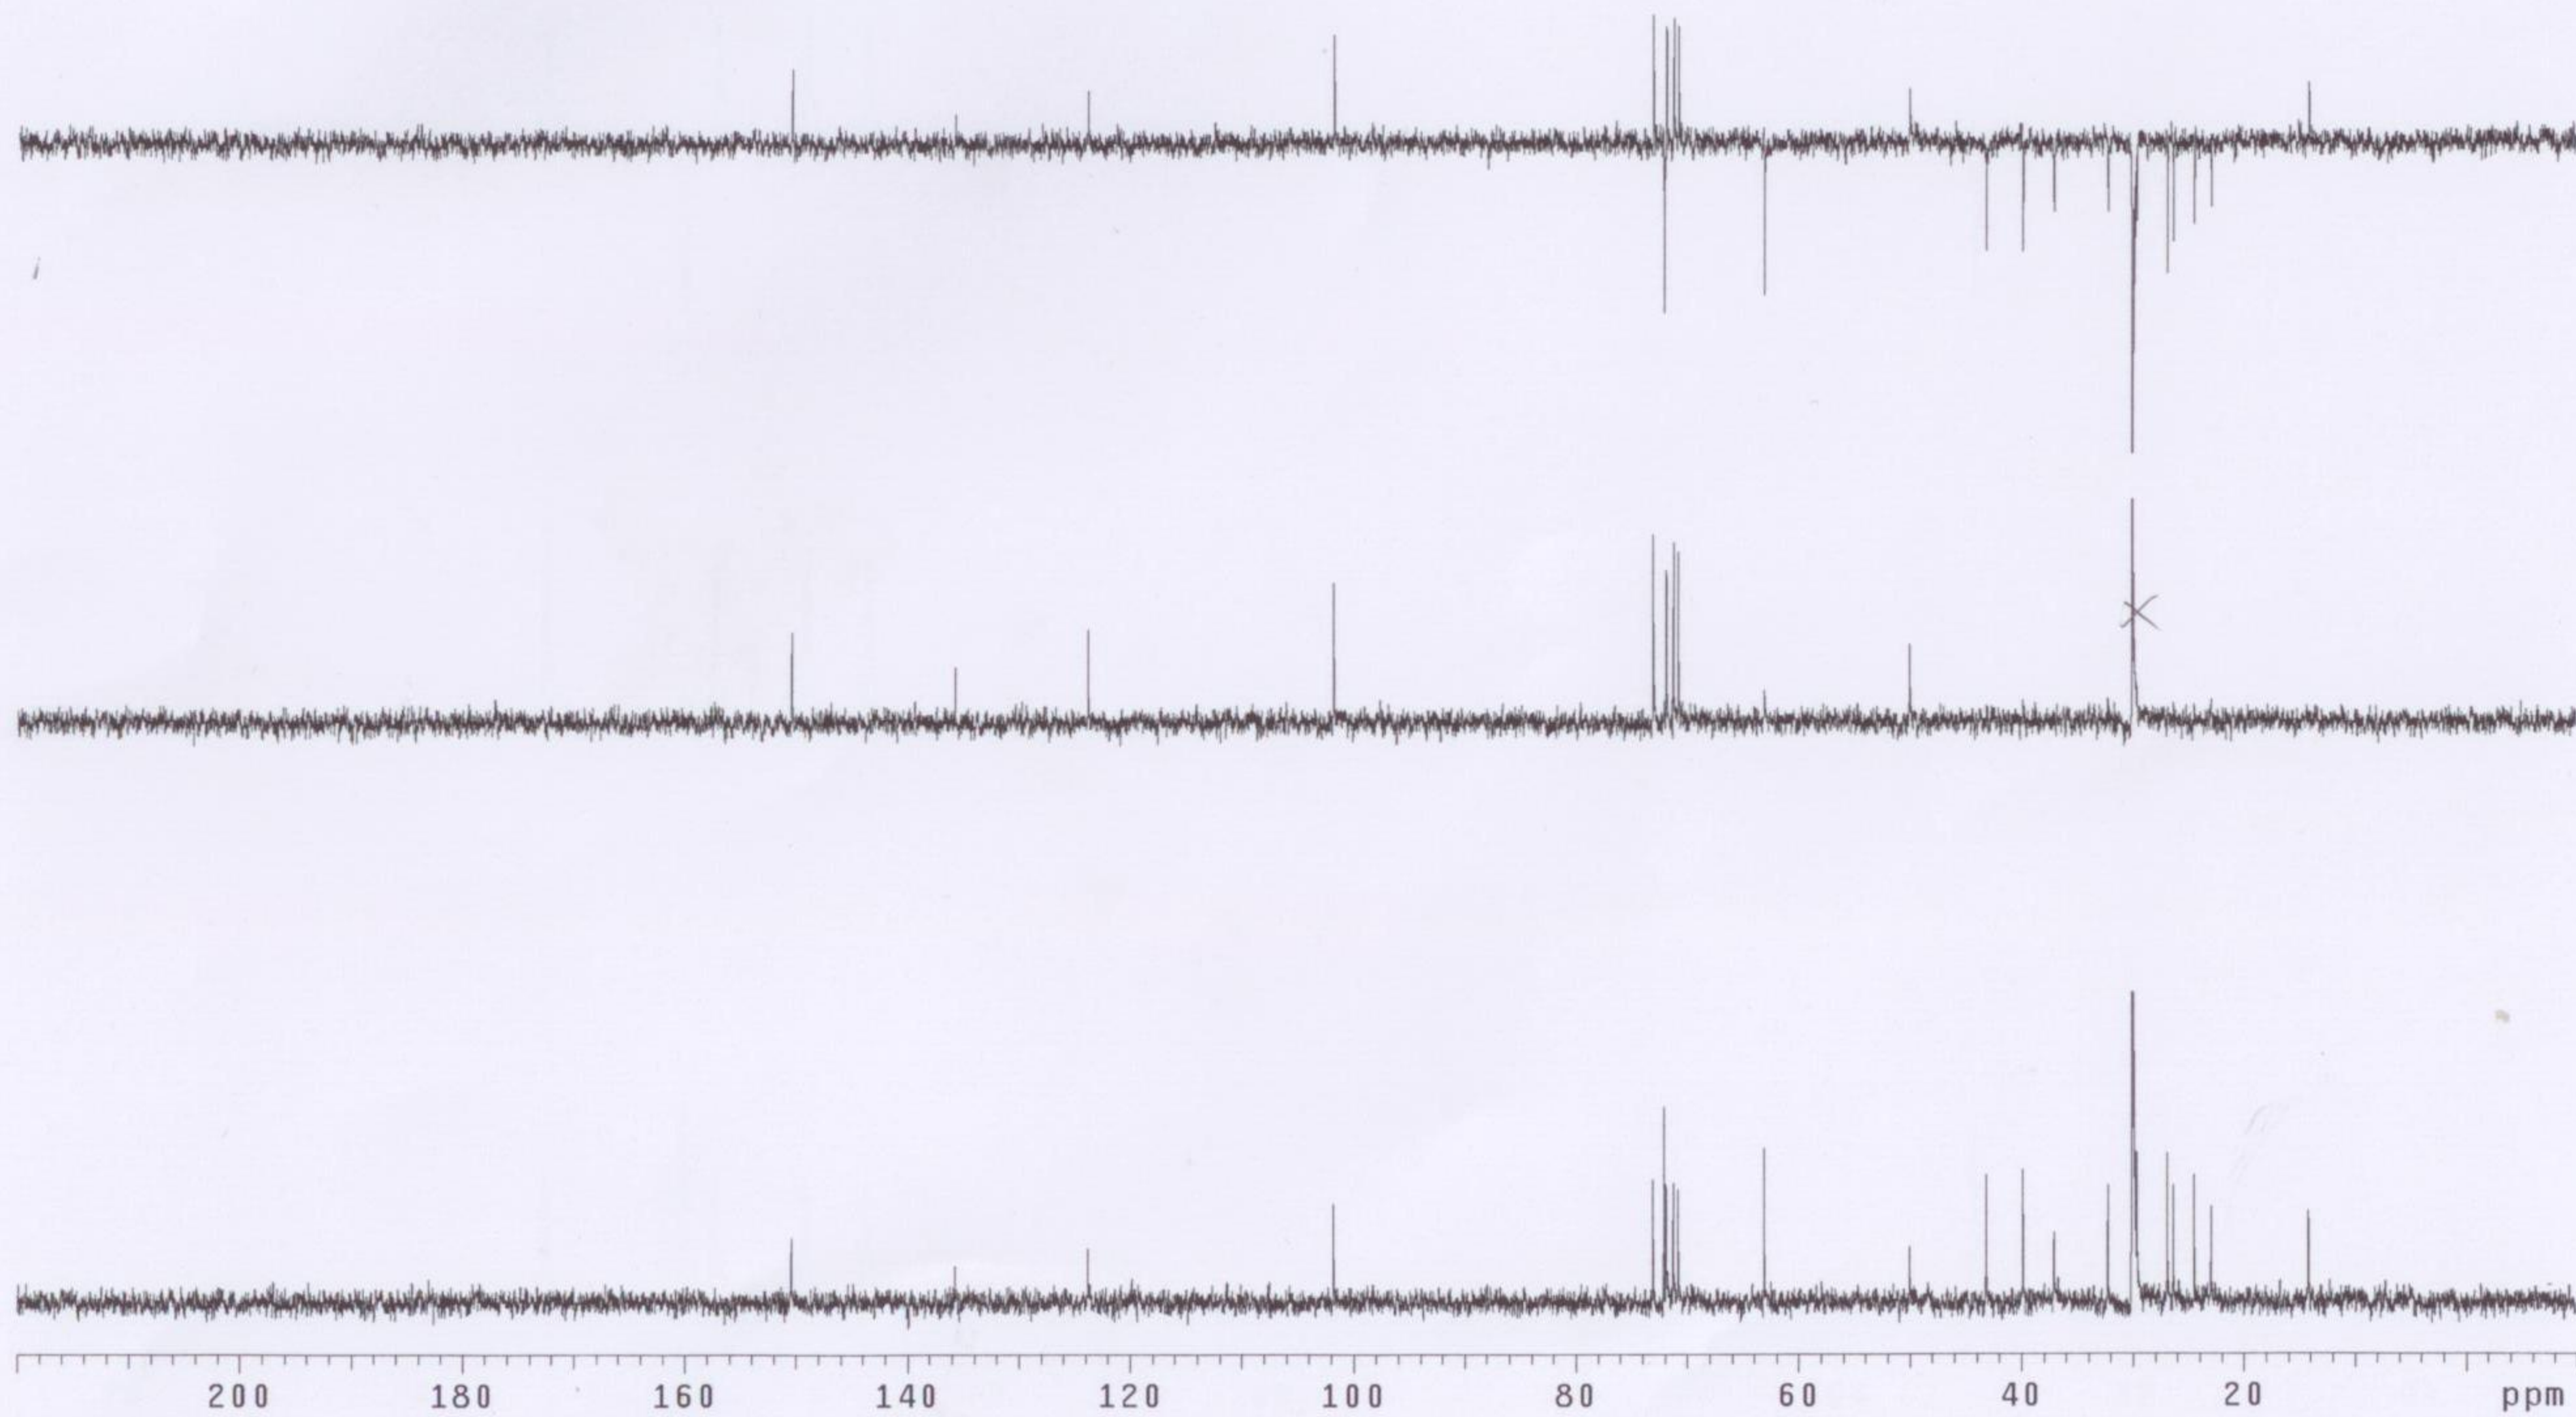

Supplement: c4ra03369h1.pdf [file c4ra03369h1.pdf]
